# Supplementary material for: An epidemiological study of the predictors of multidrug resistance and methicillin resistance among Staphylococcus spp. isolated from canine specimens submitted to a diagnostic laboratory in Tennessee, USA
Source: PeerJ. 2023 Mar 24;11:e15012. doi: 10.7717/peerj.15012 (PMC10042164; doi:10.7717/peerj.15012)
Supplement: Supplemental Information 1 [file peerj-11-15012-s001.xlsx]

## Sheet: studydata_corrected
MI_number	Year	Species	Breed	Sex	Body_site	ZoneSize_Ox	ZoneSize_Fox	ZoneSize_Cpd	AN	AMC	ampicillin	CF	C	ciproflox	CC	D	Efx	E	GM	Mar	Min	Pen	Rif	Tet	SXT	Etest_MIC	Etest_Ox	MIC_Vitek_Trek	PCR_RTmecA	SCCmec	Patient_Type	Deleted	dup_isolates	amikacin2	amoxiclav2	ampicillin2	cefpodox2	cephalothin2	chloram2	ciproflox2	clindamycin2	doxy2	enroflox2	erythro2	gentamicin2	marboflox2	minocycline2	penicillin2	rifampin2
80785	2008	CANINE	ENGLISH BULLDOG	MALE	skin	24	31	27		S	S	S	S		S			S	S	S		S		S	S						Clinical				S	S	S	S	S		S			S	S	S		S
81355	2008	CANINE	GOLDEN RETRIEVER	MALE CASTRATED	skin	21	34	29		S	R	S	S		S			S	S	S		R		R	S						Clinical				S	R	S	S	S		S			S	S	S		R
81633	2008	CANINE	GOLDEN RETRIEVER	MALE CASTRATED	skin	17	32	28	S	S	R	S	S		R	I		R	I	R		R	S	R	R					mec+, Type 5	Clinical			S	S	R	S	S	S		R	R		R	R	R		R	S
81688	2008	CANINE	GOLDEN RETRIEVER	MALE CASTRATED	skin	24	32	30		S	S	S	S		S			S	S	S		S		S	S						Clinical				S	S	S	S	S		S			S	S	S		S
82154	2008	CANINE	GOLDEN RETRIEVER	MALE CASTRATED	skin	20	35	29		S		S	R		R			R	R	S		R		R	S					0, no band	Clinical				S		S	S	R		R			R	R	S		R
81276	2008	CANINE	GRIFFON,WIREHAIRED POINTING	MALE	urine	20	34	30		S	R	S	R		R			R	R	S		R		R	S						Clinical				S	R	S	S	R		R			R	R	S		R
061410	2006	CANINE			urine	24	37	32		S	R	S	S		S			S	S	S		R		S	S				0		Referral	No	No		S	R	S	S	S		S			S	S	S		R
070257	2007	CANINE	LABRADOR RETRIEVER	MALE CASTRATED	skin	25	33	29		S	S	S	S		S			S	S	S		S		S	S					Neg	Clinical				S	S	S	S	S		S			S	S	S		S
072614a	2007	CANINE	MIXED BREED DOG	FEMALE SPAYED	skin	22	36	32		S	R	S	S		S			S	S	S		R		R	R						Clinical				S	R	S	S	S		S			S	S	S		R
065592	2006	CANINE	MIXED BREED DOG	MALE CASTRATED	skin	8	23	10		S	R	S	S		R			R	I	R		R		R	R		>256			Type 5	Clinical	No	No		S	R	R	S	S		R			R	R	R		R
075443	2007	CANINE	MIXED BREED DOG	MALE CASTRATED	skin	22	33	29		S	R	S	S		S			S	S	S		R		S	S						Clinical				S	R	S	S	S		S			S	S	S		R
84930	2008	CANINE			skin	15	31	20		S	R	S	S		S			S	S	R		R		S	S						Referral				S	R	R	S	S		S			S	S	R		R
84931	2008	CANINE			ear	15	30	26		S	R	S	S		S			S	S	R		R		S	S						Referral				S	R	S	S	S		S			S	S	R		R
094786	2009	CANINE			urine	21	36	32		S	R	S	S		S			S	S	S		R		S	S						Referral				S	R	S	S	S		S			S	S	S		R
82771	2008	CANINE	GREAT DANE	MALE CASTRATED	skin	20	34	30		S	R	S	S		S			S	S	S		R		R	S						Clinical				S	R	S	S	S		S			S	S	S		R
093414	2009	CANINE			urine	20	32	30		S	S	S	S		S			S	S	S		S		S	S						Referral				S	S	S	S	S		S			S	S	S		S
063482	2006	CANINE	YORKSHIRE TERRIER	MALE CASTRATED	joint	18	37	34		S	R	S	S		S			S	S	S		R		S	S		0.125			0	Referral	No	No		S	R	S	S	S		S			S	S	S		R
070771	2007	CANINE	DOBERMAN PINSCHER	MALE	urine	23	33	30		S	R	S	S		S			S	S	S		R		S	I						Clinical				S	R	S	S	S		S			S	S	S		R
81168	2008	CANINE	BEAGLE	MALE CASTRATED	urine	23	33	30		S	R	S	S		S			S	S	S		R		S	S						Clinical				S	R	S	S	S		S			S	S	S		R
064441	2006	CANINE	ESKIMO	FEMALE SPAYED	eye	21	33	30		S	R	S	S	S	S			S	S	S		R		S	I		0.25			0	Clinical	No	No		S	R	S	S	S	S	S			S	S	S		R
064724	2006	CANINE			urine	27	37	33		S	S	S	S		S			S	S	S		S		S	S					0	Referral	No	No		S	S	S	S	S		S			S	S	S		S
074040	2007	CANINE	BORDER COLLIE	FEMALE SPAYED	skin	20	33	29		S	R	S	S		S			S	S	S		R		R	S						Clinical				S	R	S	S	S		S			S	S	S		R
075257	2007	CANINE	BORDER COLLIE	FEMALE SPAYED	skin	6	24	6		R	R	S	S		S			S	R	S		R		R	S					mec+, Type 3	Clinical				R	R	R	S	S		S			S	R	S		R
85709	2008	CANINE	GERMAN SHEPHERD DOG	MALE	skin	23	32			S	S	S	S		S			S	S	S		S		S	S						Clinical				S	S		S	S		S			S	S	S		S
85709	2008	CANINE	GERMAN SHEPHERD DOG	MALE	skin	19	25			S	R	S	S		S			S	S	S		R		S	S						Clinical				S	R		S	S		S			S	S	S		R
090612	2009	CANINE	GERMAN SHEPHERD DOG	MALE	skin	6	23			R	R	R	S		S			S	S	I		R		S	S					POS	Clinical				R	R		R	S		S			S	S	R		R
85116	2008	CANINE	FRENCH BULLDOG	FEMALE SPAYED	skin	11	28	18	S	S	R	S	S		R	S		R	S	S	I	R	S	R	R						Clinical			S	S	R	R	S	S		R	S		R	S	S	R	R	S
090396	2009	CANINE	SHIH TZU	MALE CASTRATED	skin	6	22			S	R	S	S		R			R	S	R		R		R	R					POS	Clinical				S	R		S	S		R			R	S	R		R
090396	2009	CANINE	SHIH TZU	MALE CASTRATED	skin	24	32			S	S	S	S		S			S	S	S		S		S	S						Clinical				S	S		S	S		S			S	S	S		S
092109	2009	CANINE	SHIH TZU	MALE CASTRATED	skin	22	33	28		S	S	S	S		S			S	S	S		S		S	S						Clinical				S	S	S	S	S		S			S	S	S		S
094603	2009	CANINE	SHIH TZU	MALE CASTRATED	ear	21	31	28		S	S	S	S		S			S	S	S		S		S	S						Clinical				S	S	S	S	S		S			S	S	S		S
092478	2009	CANINE			ear	19	33	31		S	R	S	S		S			S	S	S		R		S	S					Neg	Referral				S	R	S	S	S		S			S	S	S		R
091230	2009	CANINE	COCKER SPANIEL	MALE CASTRATED	skin	19	33	29		S	R	S	S		S			S	S	S		R		S	R						Clinical				S	R	S	S	S		S			S	S	S		R
83336	2008	CANINE	ROTTWEILER	MALE CASTRATED	skin	6				R	R	S	S		R			R	S	R		R		S	S						Clinical				R	R		S	S		R			R	S	R		R
83715	2008	CANINE	MIXED BREED DOG	MALE	skin	24	31	28		S	S	S	S		S			S	S	S		S		S	S						Clinical				S	S	S	S	S		S			S	S	S		S
060571	2006	CANINE			skin	26	34	29		S	S	S	S		S			S	S	S		S		S	S				43.99		Referral	No	No		S	S	S	S	S		S			S	S	S		S
094058	2009	CANINE	GERMAN SHEPHERD DOG	FEMALE	urine	19	33	29		S	R	S	S		S			S	S	S		R		S	S					Neg	Clinical				S	R	S	S	S		S			S	S	S		R
091057	2009	CANINE	GERMAN SHEPHERD DOG	FEMALE SPAYED	skin	6	6	6	S	R	R	R	R		R	S		R	R	R	S	R	S	R	R					POS	Clinical			S	R	R	R	R	R		R	S		R	R	R	S	R	S
091907	2009	CANINE	GERMAN SHEPHERD DOG	FEMALE SPAYED	skin	9	25	11	S	S	R	S	S		R	I		R	I	R		R	S	R	R					POS	Clinical			S	S	R	R	S	S		R	R		R	R	R		R	S
83037	2008	CANINE	MIXED BREED DOG	MALE CASTRATED	skin	22	35	29		S	R	S	S		S			S	S	S		R		R	S					0,	Clinical				S	R	S	S	S		S			S	S	S		R
82250	2008	CANINE	MIXED BREED DOG	FEMALE SPAYED	urine	20	31	24		S		S	S		S			S	S	S		R		S	S					0, no band	Referral				S		S	S	S		S			S	S	S		R
075585	2007	CANINE			nasal	24	32	28		S	S	S	S		S			S	S	S		S		S	S						Referral				S	S	S	S	S		S			S	S	S		S
075888	2007	CANINE			ear	20	33	29		S	R	S	S		S			S	S	S		R		R	R						Referral				S	R	S	S	S		S			S	S	S		R
092291	2009	CANINE			peritoneal	6	13	6		R	R	S	S		S			S	S	S		R		S	S						Referral				R	R	R	S	S		S			S	S	S		R
076388	2007	CANINE	SHIH TZU	MALE CASTRATED	skin	6	20	6		S	R	S	S		R			R	I	R		R		R	R					mec+, Type 5	Clinical				S	R	R	S	S		R			R	R	R		R
80451	2008	CANINE	SHIH TZU	MALE CASTRATED	skin	21	26	21		S	S	S	S		S			S	S	S		S		S	S						Clinical				S	S	S	S	S		S			S	S	S		S
84667	2008	CANINE	SHIH TZU	MALE CASTRATED	skin	6	20	6	S	S	R	S	S		R	I		R	S	R	R	R	S	R	R						Clinical			S	S	R	R	S	S		R	R		R	S	R	R	R	S
84803	2008	CANINE	MIXED BREED DOG	FEMALE	urine	21	35	30		S	R	S	S		S			S	S	S		R		S	S						Clinical				S	R	S	S	S		S			S	S	S		R
064543	2006	CANINE			ear	26	36	33		S	R	S	S		S			S	S	S		R		R	S					0	Referral	No	No		S	R	S	S	S		S			S	S	S		R
071398	2007	CANINE	MIXED BREED DOG	FEMALE SPAYED	urine	23	37	34		S	R	S	S		R			R	S	S		R		S	I						Clinical				S	R	S	S	S		R			R	S	S		R
072845	2007	CANINE			urine	22	34	31		S	R	S	S		S			S	S	S		R		S	S						Referral				S	R	S	S	S		S			S	S	S		R
062808	2006	CANINE	GERMAN SHEPHERD DOG	MALE	skin	11	24	13		S	R	S	S		R			R	S	R		R		R	R		>256		27.2	Type 5 (407 bp)	Clinical	No	No		S	R	R	S	S		R			R	S	R		R
062916	2006	CANINE	GERMAN SHEPHERD DOG	MALE	skin	12	22	13		S	R	S	S		R			R	S	R		R		R	R				25.93	Type 5 (421 bp)	Clinical	No	No		S	R	R	S	S		R			R	S	R		R
063972	2006	CANINE	MIXED BREED DOG	MALE CASTRATED	skin	6	12	6		S	R	S	S		S			S	R	S		R		R	R				POS		Clinical	No	No		S	R	R	S	S		S			S	R	S		R
076037	2007	CANINE	MIXED BREED DOG	MALE CASTRATED	joint	6	11	6		R	R	S	S		S			S	R	S		R		R	R					mec+, Type 4d	Clinical				R	R	R	S	S		S			S	R	S		R
83071	2008	CANINE	CHOW CHOW	MALE CASTRATED	skin	25	34	30		S	S	S	S		S			S	S	S		S		S	S					0,	Clinical				S	S	S	S	S		S			S	S	S		S
092014	2009	CANINE	MINIATURE SCHNAUZER 20-30LBS	FEMALE SPAYED	nasal	20	27			S	S	S	S		S			S	S	S		S		S	S						Clinical				S	S		S	S		S			S	S	S		S
092014	2009	CANINE	MINIATURE SCHNAUZER 20-30LBS	FEMALE SPAYED	nasal	11	26	14		S	R	S	S		R			R	I	R		R		R	R					POS	Clinical				S	R	R	S	S		R			R	R	R		R
092498	2009	CANINE	MINIATURE SCHNAUZER 20-30LBS	FEMALE SPAYED	skin	6	21	6	S	S	R	S	S		R	I		R	I	R	R	R	S	R	R					POS	Clinical			S	S	R	R	S	S		R	R		R	R	R	R	R	S
064797	2006	CANINE			skin	23	35	30		S	R	S	S		S			S	S	S		R		S	S					0	Referral	No	No		S	R	S	S	S		S			S	S	S		R
84244	2008	CANINE			skin	25	33	28		S	S	S	S		S			S	S	S		S		S	S						Referral				S	S	S	S	S		S			S	S	S		S
84244	2008	CANINE			skin	20	25	20		S	S	S	S		S			S	S	S		S		S	S						Referral				S	S	R	S	S		S			S	S	S		S
83380	2008	CANINE	WEST HIGHLAND WHITE TERRIER	MALE	urine	19	32	30		S	R	S	S		S			S	S	S		R		S	I						Clinical				S	R	S	S	S		S			S	S	S		R
062605	2006	CANINE			skin	22	33	29		S	R	S	S		S			S	S	S		R		R	R		0.19		38.89		Referral	No	No		S	R	S	S	S		S			S	S	S		R
85385	2008	CANINE	MIXED BREED DOG	FEMALE SPAYED	nasal	14	25			S	R	S	S		S			S	S	S		R		S	S						Clinical				S	R		S	S		S			S	S	S		R
85385b	2008	CANINE	MIXED BREED DOG	FEMALE SPAYED	nasal	17	32			S	R	S	S		R			R	S	R		R		R	S						Clinical				S	R		S	S		R			R	S	R		R
85385c	2008	CANINE	MIXED BREED DOG	FEMALE SPAYED	nasal	19	34			S	R	S	S		R			R	S	R		R		R	S						Clinical				S	R		S	S		R			R	S	R		R
093867	2009	CANINE	DACHSHUND	FEMALE SPAYED	muscle	20	33	29		S	R	S	S		S			S	S	S		R		S	S						Clinical				S	R	S	S	S		S			S	S	S		R
072426	2007	CANINE	MIXED BREED DOG	MALE CASTRATED	skin	24	35	30		S	R	S	S		S			S	S	S		R		R	S						Referral				S	R	S	S	S		S			S	S	S		R
84661	2008	CANINE	TOY HAVANESE TERRIER	FEMALE SPAYED	urine	25	36	>30		S	R	S	S		S			S	S	S		R		S	S						Referral				S	R	S	S	S		S			S	S	S		R
061687	2006	CANINE			urine	28	37	33		S	S	S	S		S		S	S	S	S		S		S	S				0		Referral	No	No		S	S	S	S	S		S		S	S	S	S		S
061856	2006	CANINE			skin	6	6	6		R	R	R	S		R			R	S	R		R		S	S				27	Type 2	Referral	No	No		R	R	R	R	S		R			R	S	R		R
061460	2006	CANINE	SCOTTISH TERRIER	FEMALE SPAYED	skin	6	22	6		S	R	S	S		R			R	S	R		R		R	R		>256		27.47	Type 5 (285bp)	Referral	No	No		S	R	R	S	S		R			R	S	R		R
092289	2009	CANINE			ear	17	24	19		S	R	S	S		S			S	S	S		R		S	S						Referral				S	R	R	S	S		S			S	S	S		R
85019	2008	CANINE			skin	8	23	13		S	R	S	S		R			R	S	R		R		R	R						Referral				S	R	R	S	S		R			R	S	R		R
090710	2009	CANINE	GERMAN SHEPHERD DOG	MALE CASTRATED	skin	6	11			R	R	R	S		S			R	S	R		R		S	S					POS	Referral				R	R		R	S		S			R	S	R		R
090710	2009	CANINE	GERMAN SHEPHERD DOG	MALE CASTRATED	skin	19	34			S	R	S	S		S			S	S	S		R		R	S						Referral				S	R		S	S		S			S	S	S		R
84833	2008	CANINE	LABRADOR RETRIEVER	MALE	skin	19	33	29		S	R	S	S		S			S	S	S		R		S	S						Clinical				S	R	S	S	S		S			S	S	S		R
84834	2008	CANINE	LABRADOR RETRIEVER	MALE	skin	18	>30	29		S	R	S	S		S			S	S	S		R		S	S						Clinical				S	R	S	S	S		S			S	S	S		R
85314	2008	CANINE	LABRADOR RETRIEVER	MALE	skin	6	17			R	R	I	S		S			S	I	S		R		S	S						Clinical				R	R		R	S		S			S	R	S		R
092730a	2009	CANINE	LABRADOR RETRIEVER	MALE	skin	12	25	20		S	R	S	S	S	S			S	S			R		S	S					POS	Clinical				S	R	R	S	S	S	S			S	S			R
092730b	2009	CANINE	LABRADOR RETRIEVER	MALE	skin	17	33	28		S	R	S	S	S	R			R	S			R	S	R	I	=0.25				Neg	Clinical				S	R	S	S	S	S	R			R	S			R	S
093428	2009	CANINE	LABRADOR RETRIEVER	MALE	skin	12	23	14	S	S	R	S	S		R	I		R	I	R	I	R	S	R	R					POS	Clinical			S	S	R	R	S	S		R	R		R	R	R	R	R	S
093907	2009	CANINE	LABRADOR RETRIEVER	MALE	skin	11	24	15	S	S	R	S	S		R	I		R	I	R	R	R	S	R	R					POS	Clinical			S	S	R	R	S	S		R	R		R	R	R	R	R	S
094528	2009	CANINE	LABRADOR RETRIEVER	MALE	skin	11	23	14	S	S	R	S	S		R	I		R	I	R	R	R	S	R	R					POS	Clinical			S	S	R	R	S	S		R	R		R	R	R	R	R	S
090546	2009	CANINE			skin	23	34			S	S	S	S		S			S	S	S		S		S	S						Referral				S	S		S	S		S			S	S	S		S
092459	2009	CANINE	WEIMARANER	MALE	skin	23	35	28		S	S	S	S		S			S	S	S		S		S	S					Neg	Clinical				S	S	S	S	S		S			S	S	S		S
076270	2007	CANINE	BOYKIN SPANIEL	FEMALE SPAYED	skin	6	20	6		S	R	S	S		S			S	R	S		R		S	S						Clinical				S	R	R	S	S		S			S	R	S		R
090553	2009	CANINE			ear	23	34			S	S	S	S		S			S	S	S		S		R	S						Referral				S	S		S	S		S			S	S	S		S
090287	2009	CANINE	GERMAN SHEPHERD DOG	FEMALE	bone	26	35			S	R	S	S		S			S	S	S		R		R	S					Neg	Clinical				S	R		S	S		S			S	S	S		R
060754	2006	CANINE			nasal	28	36	30		S	S	S	S		S			S	S	S		S		S	S				0		Referral	No	No		S	S	S	S	S		S			S	S	S		S
82804	2008	CANINE			ear	21	33	30		S	R	S	S		S			S	S	S		R			S					0, no band	Referral				S	R	S	S	S		S			S	S	S		R
092548	2009	CANINE	STANDARD POODLE	FEMALE SPAYED	trach/bronch	6	20	6	S	R	R	S	S		R	I		R	I	R	I	R	S	R	R					POS	Clinical			S	R	R	R	S	S		R	R		R	R	R	R	R	S
090208	2009	CANINE			skin	6	6			R	R	R	S		R			R	S	R		R		S	S					Neg	Referral				R	R		R	S		R			R	S	R		R
092579	2009	CANINE	GERMAN SHEPHERD DOG	FEMALE SPAYED	skin	6	11	6		R	R	R	S		S			R	S	R		R		S	S					POS	Clinical				R	R	R	R	S		S			R	S	R		R
093479	2009	CANINE	GERMAN SHEPHERD DOG	FEMALE SPAYED	blood	6		6	I	R	R	R	S		S	S		R	S	R	S	R	S	S	S					POS	Clinical			R	R	R	R	R	S		S	S		R	S	R	S	R	S
094775	2009	CANINE			ear	19	32	28		S	R	S	S		S			S	S	S		R		S	S						Referral				S	R	S	S	S		S			S	S	S		R
092370	2009	CANINE			skin	19	32	29		S	R	S	S		S			S	S	S		R		S	S						Referral				S	R	S	S	S		S			S	S	S		R
093554	2009	CANINE			skin	13	26	16		S	R	S	S	R	R			R	I			R		R	R					POS	Referral				S	R	R	S	S	R	R			R	R			R
091959	2009	CANINE	MIXED BREED DOG	FEMALE SPAYED	skin	6	24	9		S	R	S	S		S			S	S	R		R		R	S					POS	Referral				S	R	R	S	S		S			S	S	R		R
83902a	2008	CANINE	PUG	FEMALE SPAYED	urine	17	33	30		S	R	S	S		S			S	S	S		R		R	R						Clinical				S	R	S	S	S		S			S	S	S		R
83902c	2008	CANINE	PUG	FEMALE SPAYED	urine	19	30	24		S	R	S	S		S			S	S	S		R		R	R						Clinical				S	R	S	S	S		S			S	S	S		R
063983	2006	CANINE	MINIATURE SCHNAUZER 20-30LBS	MALE CASTRATED	bone	22	33	30		S	R	S	S		R			R	R	S		R		R	R		0.19			0	Clinical	No	No		S	R	S	S	S		R			R	R	S		R
091858	2009	CANINE			ear	6	25	6		S	R	S	S		S			S	R	R		R		S	S					POS	Referral				S	R	R	S	S		S			S	R	R		R
090207	2009	CANINE	MIXED BREED DOG	FEMALE SPAYED	nasal	19	33			S	R	S	S		S	S		S	S	S		R		R	S					Neg	Referral				S	R		S	S		S	S		S	S	S		R
075017	2007	CANINE	MASTIFF	MALE	ear	14	23	17		S	R	S	S		R			R	I	R		R		R	R					mec+, Type 5	Clinical				S	R	R	S	S		R			R	R	R		R
81437	2008	CANINE	WEST HIGHLAND WHITE TERRIER	FEMALE SPAYED	ear	23	34	28		S	R	S	S		S			S	S	S		R		S	S						Referral				S	R	S	S	S		S			S	S	S		R
091138	2009	CANINE			urine	20	34	30		S	R	S	S		S			S	S	S		R		S	S						Referral				S	R	S	S	S		S			S	S	S		R
85569	2008	CANINE	MIXED BREED DOG	FEMALE SPAYED	skin	6	21		S	R	R	R	S		R	I		R	I	R	I	R	S	R	R						Clinical			S	R	R		R	S		R	R		R	R	R	R	R	S
093728	2009	CANINE	LABRADOR RETRIEVER	FEMALE SPAYED	skin	16.5	34	30		S	R	S	S	S	S			S	S	S		R	S	S	I	=0.25				Neg	Clinical				S	R	S	S	S	S	S			S	S	S		R	S
093856	2009	CANINE			skin	19	34	30		S	R	S	R	S	R			R	R			R		R	I						Referral				S	R	S	S	R	S	R			R	R			R
070281	2007	CANINE	DOBERMAN PINSCHER	FEMALE SPAYED	skin	19	30	25		S	R	S	S		S			S	S	S		R		S	S					Neg	Clinical				S	R	S	S	S		S			S	S	S		R
071748	2007	CANINE			ear	26	37	31		S	S	S	S		S			S	S	S		S		S	S						Referral				S	S	S	S	S		S			S	S	S		S
063062a	2006	CANINE	TOY POODLE	MALE CASTRATED	ttw	23	34	31		S	R	S	S		S			S	S	S		R		S	S				38.6		Clinical	No	No		S	R	S	S	S		S			S	S	S		R
063062b	2006	CANINE	TOY POODLE	MALE CASTRATED	ttw	13	23	15		S	R	S	S		R			R	I	R		R		R	R		>256		26.82	Type 5 (380 bp)	Clinical	No	No		S	R	R	S	S		R			R	R	R		R
075746	2007	CANINE	BORDER COLLIE	FEMALE SPAYED	skin	6	22	6		S	R	S	S		R			R	I	R		R		R	R					mec+, Type 5	Clinical				S	R	R	S	S		R			R	R	R		R
80153	2008	CANINE	BORDER COLLIE	FEMALE SPAYED	skin	6	24	10	S	S	R	S	R		R	I		R	R	R		R	S	R	R					mec+,	Clinical			S	S	R	R	S	R		R	R		R	R	R		R	S
80619a	2008	CANINE	BORDER COLLIE	FEMALE SPAYED	nasal	20	33	30		S	R	S	R		R			R	R	S		R		R	S						Clinical				S	R	S	S	R		R			R	R	S		R
80619b	2008	CANINE	BORDER COLLIE	FEMALE SPAYED	nasal	6	23	6		S	R	S	S		R			R	S	R		R		R	R					mec+, Type 5	Clinical				S	R	R	S	S		R			R	S	R		R
80624	2008	CANINE	BORDER COLLIE	FEMALE SPAYED	skin	20	33	29		S	R	S	R		R	I		R	R	S		R		R	S						Clinical				S	R	S	S	R		R	R		R	R	S		R
82056	2008	CANINE	BORDER COLLIE	FEMALE SPAYED	nasal/axilla	9	28	13		S	R	S	S		R			R	I	R		R		R	R					mec+, Type 5	Clinical				S	R	R	S	S		R			R	R	R		R
064380	2006	CANINE	BOXER	MALE CASTRATED	nasal	6	10	6		R	R	S	S		R			R	S	S		R		S	S				POS		Referral	No	No		R	R	R	S	S		R			R	S	S		R
82213	2008	CANINE	BLOOD HOUND	MALE	skin	23	33	29		S		S	S		S			S	S	S		R		S	S					0, no band	Clinical				S		S	S	S		S			S	S	S		R
073225	2007	CANINE			tracheal	22	34	30		S	R	S	S		S			S	S	S		R		R	S						Referral				S	R	S	S	S		S			S	S	S		R
80071	2008	CANINE			ear	19	34	29		S	R	S	S		S			S	S	S		R		S	S						Referral				S	R	S	S	S		S			S	S	S		R
074337	2007	CANINE	LHASA APSO		ear	25	35	32		S	S	S	S	R	S			S	S	R		S		S	S						Referral				S	S	S	S	S	R	S			S	S	R		S
074856	2007	CANINE	LHASA APSO		ear	22	31	28		S	S	S	S		S			S	S	R		S		S	S						Referral				S	S	S	S	S		S			S	S	R		S
82371	2008	CANINE			skin	17	26	29		S		S	S		S			S	S	S		R		S	S					0, no band	Referral				S		S	S	S		S			S	S	S		R
80355	2008	CANINE			skin	6	23	6	I	S	R	S	S		R	I		R	R	R		R	S	R	R					mec+, Type 5	Referral			R	S	R	R	S	S		R	R		R	R	R		R	S
091408	2009	CANINE			joint	23	33	29		S	S	S	S		S			S	S	S		S		S	S					Neg	Referral				S	S	S	S	S		S			S	S	S		S
82331	2008	CANINE	GERMAN SHEPHERD DOG	FEMALE SPAYED	skin	21	34	30		S		S	S		S			S	S	S		R		S	S					0, no band	Clinical				S		S	S	S		S			S	S	S		R
065759	2006	CANINE	PEKINGESE	FEMALE SPAYED	urine	23	35	30		S	R	S	S		S			S	S	S		R		R	S					0	Clinical	No	No		S	R	S	S	S		S			S	S	S		R
090697	2009	CANINE			skin	11	25			S	R	S	S		R			R	S	R		R		R	R					POS	Referral				S	R		S	S		R			R	S	R		R
85262	2008	CANINE	GOLDEN RETRIEVER	MALE CASTRATED	skin	23	33	29		S	S	S	S		S			S	S	S		S		S	S						Clinical				S	S	S	S	S		S			S	S	S		S
85263	2008	CANINE	GOLDEN RETRIEVER	MALE CASTRATED	ear	22	34	32		S	S	S	S		S			S	S	S		S		S	S						Clinical				S	S	S	S	S		S			S	S	S		S
065078	2006	CANINE	MIXED BREED DOG	MALE CASTRATED	skin	6	24	6		S	R	S	S		R			R	S	R		R		R	R		>256			Type 5	Clinical	No	No		S	R	R	S	S		R			R	S	R		R
84731	2008	CANINE	MIXED BREED DOG	MALE CASTRATED	skin	6	21	6	S	S	R	S	S		R	I		R	S	R	I	R	S	R	R						Clinical			S	S	R	R	S	S		R	R		R	S	R	R	R	S
84565	2008	CANINE	COCKER SPANIEL	MALE CASTRATED	ear	20	29	26		S	R	S	S		S			S	R	R		R		S	S						Clinical				S	R	S	S	S		S			S	R	R		R
84566	2008	CANINE	COCKER SPANIEL	MALE CASTRATED	skin	24	35	30		S	R	S	S		S			S	S	S		R		S	S						Clinical				S	R	S	S	S		S			S	S	S		R
84567	2008	CANINE	COCKER SPANIEL	MALE CASTRATED	skin	20	31	28		S	R	S	S		S			S	R	R		R		S	S						Clinical				S	R	S	S	S		S			S	R	R		R
84349	2008	CANINE			skin	9	24	11		S	R	S	S		R			R	S	R		R		R	R						Referral				S	R	R	S	S		R			R	S	R		R
071867	2007	CANINE			ear	22	34	30		S	R	S	S		S			S	S	S		R		S	S						Referral				S	R	S	S	S		S			S	S	S		R
80175	2008	CANINE	MIXED BREED DOG	FEMALE SPAYED	lung	22	32	28		S	R	S	S		S			S	S	S		R		S	S						Clinical				S	R	S	S	S		S			S	S	S		R
074980	2007	CANINE	DACHSHUND	FEMALE SPAYED	skin	20	33	30		S	R	S	S		R			R	S	S		R		R	S						Clinical				S	R	S	S	S		R			R	S	S		R
076187	2007	CANINE	DACHSHUND	FEMALE SPAYED	skin	20	35	30		S	R	S	S		R		S	R	S			R		R	S						Clinical				S	R	S	S	S		R		S	R	S			R
83018	2008	CANINE	DACHSHUND	FEMALE SPAYED	skin	20	34	30		S	R	S	S		R			R	S	S		R		R	S					0,	Clinical				S	R	S	S	S		R			R	S	S		R
093439	2009	CANINE	MIXED BREED DOG	MALE CASTRATED	ear	23	33	30		S	R	S	S		S			S	S	S		R		S	S						Clinical				S	R	S	S	S		S			S	S	S		R
093439	2009	CANINE	MIXED BREED DOG	MALE CASTRATED	ear	23	31	27		S	S	S	S		S			S	S	S		S		S	S						Clinical				S	S	S	S	S		S			S	S	S		S
063832	2006	CANINE			urine	28	38	35		S	S	S	S		S			S	S	S		S		S	S					0	Referral	No	No		S	S	S	S	S		S			S	S	S		S
075419	2007	CANINE			ear	23	37	>30		S	S	S	S		S			S	S	S		S		S	S						Referral				S	S	S	S	S		S			S	S	S		S
076006	2007	CANINE			ear	23	32	29		S	S	S	S		S			S	S	S		S		S	S						Referral				S	S	S	S	S		S			S	S	S		S
093661	2009	CANINE	FIELD SPANIEL	FEMALE SPAYED	skin	9	24	15		S	R	S	S		R			R	I	R		R		R	R					POS	Clinical				S	R	R	S	S		R			R	R	R		R
064561	2006	CANINE	BERNESE MOUNTAIN DOG	FEMALE SPAYED	pleural	21	30	27		S	R	S	S		S			S	S	S		R		S	S		0.094		Neg		Clinical	No	No		S	R	S	S	S		S			S	S	S		R
065360	2006	CANINE			urine	25	40	38		S	R	S	S		S			S	S	S		R		R	S					0	Referral	No	No		S	R	S	S	S		S			S	S	S		R
064531	2006	CANINE	BOXER	FEMALE SPAYED	skin	25	35	32		S	R	S	S		S			S	S	S		R		S	I					0	Clinical	No	No		S	R	S	S	S		S			S	S	S		R
072814	2007	CANINE	BOXER	FEMALE SPAYED	skin	6	6	6		R	R	S	I		R			R	S	R		R		S	S					mec+, Type 5	Clinical				R	R	R	S	R		R			R	S	R		R
072814	2007	CANINE	BOXER	FEMALE SPAYED	skin	22	34	30		S	R	S	S		S			S	S	S		R		S	S						Clinical				S	R	S	S	S		S			S	S	S		R
073505	2007	CANINE	BOXER	FEMALE SPAYED	skin	6	23	6		S	R	S	S		R			R	I	R		R		R	R					mec+, Type 5	Clinical				S	R	R	S	S		R			R	R	R		R
075699	2007	CANINE	BOXER	FEMALE SPAYED	skin	6	22	9		S	R	S	S		R			R	I	R		R		R	R					mec+, Type 5	Clinical				S	R	R	S	S		R			R	R	R		R
84574	2008	CANINE	GOLDEN RETRIEVER	MALE CASTRATED	skin	18	32	27		S	R	S	S		S			S	I	I		R		S	S						Clinical				S	R	S	S	S		S			S	R	R		R
84890	2008	CANINE	STANDARD SCHNAUZER 30-40LBS	FEMALE	urine	21	33	28		S	R	S	S		S			S	S	S		R		S	S						Referral				S	R	S	S	S		S			S	S	S		R
090288	2009	CANINE	STANDARD SCHNAUZER 30-40LBS	FEMALE	urine	19	35			S	R	S	S		S			S	S	S		R		S	S					Neg	Referral				S	R		S	S		S			S	S	S		R
092461	2009	CANINE			ear	19	30	24		S	S	S	S		S			S	S	S		S		S	S						Referral				S	S	S	S	S		S			S	S	S		S
092836	2009	CANINE			skin	6	20	6		R	R	S	S	R	R			R	R			R		R	R					POS	Referral				R	R	R	S	S	R	R			R	R			R
094506	2009	CANINE	GREAT PYRENEES	MALE CASTRATED	skin	25	=33	33		S	S	S	S		S			S	S	S		S		R	S						Clinical				S	S	S	S	S		S			S	S	S		S
073474	2007	CANINE	GOLDEN RETRIEVER	MALE	skin	12	25	16		S	R	S	S		R			R	I	R		R		R	R					mec+, Type 5	Clinical				S	R	R	S	S		R			R	R	R		R
074185	2007	CANINE	GOLDEN RETRIEVER	MALE	skin	12	25	15		S	R	S	S		R			R	I	R		R		R	R					mec+, Type 5	Clinical				S	R	R	S	S		R			R	R	R		R
83940	2008	CANINE	GOLDEN RETRIEVER	MALE	skin	17	32	30	S	S	R	S	S		R	I		R	S	R	I	R	S	R	R						Clinical			S	S	R	S	S	S		R	R		R	S	R	R	R	S
075251	2007	CANINE	MIXED BREED DOG	FEMALE SPAYED	mammary	20	35	29		S	R	S	S		S			S	S	S		R		S	S						Clinical				S	R	S	S	S		S			S	S	S		R
076215	2007	CANINE			joint	19	32	28		S	R	S	S		S			S	S	S		R		S	S						Referral				S	R	S	S	S		S			S	S	S		R
85221	2008	CANINE	BERNESE MOUNTAIN DOG	FEMALE SPAYED	joint	6	18	6		R	R	R	S		R			R	S	R		R		R	R						Clinical				R	R	R	R	S		R			R	S	R		R
075770	2007	CANINE	SHIH TZU	MALE CASTRATED	eye	20	33	29		S	R	S	S	S	S			S	S	S		R		S	S						Clinical				S	R	S	S	S	S	S			S	S	S		R
83353	2008	CANINE	AKITA	MALE CASTRATED	joint	17	24	20		S	R	S	S		S			S	S	S		R		S	S						Clinical				S	R	R	S	S		S			S	S	S		R
063702	2006	CANINE			skin	24	35	30		S	R	S	S		S			S	S	S		R		S	S					0	Referral	No	No		S	R	S	S	S		S			S	S	S		R
83208a	2008	CANINE	DALMATIAN	MALE CASTRATED	skin	6	23	9		S	R	S	S		R			R	S	R		R		R	R						Clinical				S	R	R	S	S		R			R	S	R		R
83208b	2008	CANINE	DALMATIAN	MALE CASTRATED	skin	9	24	15		S	R	S	S		S			S	S	S		R		R	S						Clinical				S	R	R	S	S		S			S	S	S		R
092129	2009	CANINE	DALMATIAN	MALE CASTRATED	skin	18	35	31		S	R	S	S		S			S	S	S		R		S	I						Clinical				S	R	S	S	S		S			S	S	S		R
094394	2009	CANINE	CAIRN TERRIER	FEMALE SPAYED	skin	21	33	28		S	R	S	S		S			S	S	S		R		S	S						Clinical				S	R	S	S	S		S			S	S	S		R
83713	2008	CANINE	GERMAN SHEPHERD DOG	MALE	joint	6	18	6		R	R	R	S		R			R	S	R		R		R	R						Clinical				R	R	R	R	S		R			R	S	R		R
073687	2007	CANINE			ear	24	33	30		S	R	S	S		S			S	S	S		R		S	S						Referral				S	R	S	S	S		S			S	S	S		R
83945	2008	CANINE			ear	20	32	25		S	S	S	S		S			S	S	S		S		S	S						Referral				S	S	S	S	S		S			S	S	S		S
090408	2009	CANINE			skin	20	24			S	R	S	S		R			R	S	R		R		S	S						Referral				S	R		S	S		R			R	S	R		R
073843	2007	CANINE			urine	19	35	29		S	R	S	S		S			S	I	R		R		R	R						Referral				S	R	S	S	S		S			S	R	R		R
073812a	2007	CANINE			ear	20	34	29		S	R	S	S		R		R	R	R	R		R		R	R					Neg	Referral				S	R	S	S	S		R		R	R	R	R		R
073812b	2007	CANINE			ear	11	25	14		S	R	S	S		R		R	R	R	R		R		R	R					mec+, Type 5	Referral				S	R	R	S	S		R		R	R	R	R		R
092914	2009	CANINE			skin	6	25	6		S	R	S	S		S			S	R	I		R		S	S					POS	Referral				S	R	R	S	S		S			S	R	R		R
060081	2006	CANINE	MIXED BREED DOG	FEMALE SPAYED	bone	13	23	15		S	R	S	S		R			R	S	R		R		R	R		>256		POS	Type 5 (faint)	Clinical	No	No		S	R	R	S	S		R			R	S	R		R
060174	2006	CANINE			ear	24	37	32		S	R	S	S		S			S	S	S		R		R	S				0		Referral	No	No		S	R	S	S	S		S			S	S	S		R
061703	2006	CANINE	STAFFORDSHIRE TERRIER	MALE	skin	24	36	31		S	R	S	S		R			R	S	S		R		S	S				0		Clinical	No	No		S	R	S	S	S		R			R	S	S		R
061704	2006	CANINE	STAFFORDSHIRE TERRIER	MALE	skin	22	34	29		S	R	S	S		R			R	S	S		R		S	I		0.25		0		Clinical	No	No		S	R	S	S	S		R			R	S	S		R
064530	2006	CANINE	STAFFORDSHIRE TERRIER	MALE	skin	13	26	17		S	R	S	S		R			R	S	R		R		R	R		3			Type 5	Clinical	No	No		S	R	R	S	S		R			R	S	R		R
064997	2006	CANINE	CANINE UNASSIGNED	MALE CASTRATED	skin	6	27	6		S	R	S	S		R			R	S	S		R		R	I		>256			Type 5	Clinical	No	No		S	R	R	S	S		R			R	S	S		R
065460	2006	CANINE	CANINE UNASSIGNED	MALE CASTRATED	skin	6	26	6		S	R	S	S		R			R	S	S		R		R	I					Type 5	Clinical	No	No		S	R	R	S	S		R			R	S	S		R
071456	2007	CANINE			nasal	6	22	6		S	R	S	S		S			S	R	R		R		S	S					mec+, Type 3	Referral				S	R	R	S	S		S			S	R	R		R
071515	2007	CANINE		FEMALE SPAYED	urine	21	33	30		S	R	S	S		R			R	S	S		R		R	R						Referral				S	R	S	S	S		R			R	S	S		R
071517	2007	CANINE	MIXED BREED DOG	FEMALE SPAYED	skin	6	25	15		S	R	S	S		R			R	S	R		R		R	R					mec+, Type 5	Clinical				S	R	R	S	S		R			R	S	R		R
074754b	2007	CANINE	STAFFORDSHIRE TERRIER	MALE	skin	11	24	14		S	R	S	S		R			R	I	R		R		R	R					mec+, no band	Clinical				S	R	R	S	S		R			R	R	R		R
074754c	2007	CANINE	STAFFORDSHIRE TERRIER	MALE	skin	6	8	6		R	R	S	S		R			R	S	R		R		S	S					mec+, Type 2	Clinical				R	R	R	S	S		R			R	S	R		R
076237	2007	CANINE	STAFFORDSHIRE TERRIER	MALE	skin	12	25	15		S	R	S	S		R			R	S	R		R		R	R						Clinical				S	R	R	S	S		R			R	S	R		R
82433	2008	CANINE	SCOTTISH TERRIER	FEMALE SPAYED	skin	24	32	29		S		S	S		S			S	S	S		S		S	S					0, no band	Clinical				S		S	S	S		S			S	S	S		S
82433a	2008	CANINE	SCOTTISH TERRIER	FEMALE SPAYED	skin	6	12	6		S		S	S		S			S	S	S		R		S	S					mec+, no band	Clinical				S		R	S	S		S			S	S	S		R
82531	2008	CANINE	MIXED BREED DOG	FEMALE SPAYED	skin	11	24	14	S	S		S	S		R	I		R	R	R		R	S	R	R					mec+, Type 5	Clinical			S	S		R	S	S		R	R		R	R	R		R	S
82671	2008	CANINE	CANINE UNASSIGNED	MALE CASTRATED	skin	6	25	6	S	R	R	R	S		R	S		R	S	S		R	S	R	S					0, no band	Clinical			S	R	R	R	R	S		R	S		R	S	S		R	S
83151	2008	CANINE	SCOTTISH TERRIER	FEMALE SPAYED	skin	6	21	6	S	R	R	S	S		R	I		R	I	R	I	R	S	R	R						Clinical			S	R	R	R	S	S		R	R		R	R	R	R	R	S
84972	2008	CANINE	MIXED BREED DOG	FEMALE SPAYED	skin	6	20	6		R	R	S	S		S			S	I	R		R		S	S						Clinical				R	R	R	S	S		S			S	R	R		R
090911	2009	CANINE			skin	6	24	6		R	R	S	S		S			S	I	S		R		S	S					POS	Referral				R	R	R	S	S		S			S	R	S		R
091549a	2009	CANINE	CANINE UNASSIGNED	MALE CASTRATED	skin	24	34	30		S	S	S	S		S			S	S	S		S		S	S					Neg	Clinical				S	S	S	S	S		S			S	S	S		S
091549b	2009	CANINE	CANINE UNASSIGNED	MALE CASTRATED	skin	18	34	28		S	R	S	S		S			S	S	S		R		S	S					Neg	Clinical				S	R	S	S	S		S			S	S	S		R
092466	2009	CANINE	CAIRN TERRIER	FEMALE SPAYED	skin	24	33	27		S	S	S	S		S			S	S	S		S		S	S					Neg	Clinical				S	S	S	S	S		S			S	S	S		S
094214	2009	CANINE			skin	23	33	29		S	R	S	S		S			S	S	S		R		S	S						Referral				S	R	S	S	S		S			S	S	S		R
061308	2006	CANINE	BOYKIN SPANIEL	FEMALE	cervical	20	28	23		S	R	S	S		S			S	S	S		R		S	S				0		Clinical	No	No		S	R	S	S	S		S			S	S	S		R
075054	2007	CANINE			skin	22	34	31		S	R	S	S		S			S	S	S		R		R	S						Referral				S	R	S	S	S		S			S	S	S		R
090084	2009	CANINE	MIXED BREED DOG	MALE	skin	20	34			S	R	S	S		S			S	S	S		R		S	S					POS	Clinical				S	R		S	S		S			S	S	S		R
062186	2006	CANINE			ear	21	36	31		S	R	S	S		S			S	S	S		R		R	S				37		Referral	No	No		S	R	S	S	S		S			S	S	S		R
84807	2008	CANINE	NEWFOUNDLAND	FEMALE SPAYED	bone	6	21	6	S	S	R	S	S		R	I		R	S	R	I	R	S	R	R						Referral			S	S	R	R	S	S		R	R		R	S	R	R	R	S
090129	2009	CANINE			bone	6	22		S	S	R	S	S		R	I		R	S	R	I	R	S	R	R					POS	Referral			S	S	R		S	S		R	R		R	S	R	R	R	S
065361	2006	CANINE			nasal	16	29	20		S	R	S	S		R			R	S	R		R		R	R		0.75			Type 5	Referral	No	No		S	R	R	S	S		R			R	S	R		R
81645	2008	CANINE	POMERANIAN	MALE CASTRATED	tracheal	20	34	30		S	R	S	S		S			S	S	S		R		S	I						Clinical				S	R	S	S	S		S			S	S	S		R
82150	2008	CANINE	MIXED BREED DOG	MALE CASTRATED	joint	6	17	6	S	R		R	S		S	S		S	R	S		R	S	S	S					mec+, no band	Clinical			S	R		R	R	S		S	S		S	R	S		R	S
82478	2008	CANINE	MIXED BREED DOG	MALE CASTRATED	skin	6	17	6		R		R	S		S			S	R	S		R		S	S					mec+, no band	Clinical				R		R	R	S		S			S	R	S		R
062185	2006	CANINE	IRISH SETTER	FEMALE SPAYED	ear	22	35	31		S	R	S	S		R			R	S	R		R		R	S		0.25		36.7		Referral	No	No		S	R	S	S	S		R			R	S	R		R
85483	2008	CANINE	WEIMARANER	MALE CASTRATED	nasal	6	22			R	R	S	S		R			R	S	R		R		R	R						Clinical				R	R		S	S		R			R	S	R		R
092096	2009	CANINE			skin	12	27	16		S	R	S	S		R			R	I	R		R		R	R					POS	Referral				S	R	R	S	S		R			R	R	R		R
094598	2009	CANINE	ENGLISH BULLDOG	FEMALE SPAYED	ear	18	32	28		S	R	S	S		R			R	R	S		R		S	S						Clinical				S	R	S	S	S		R			R	R	S		R
80231	2008	CANINE	SHETLAND SHEEPDOG	MALE CASTRATED	bone	6	20	7		S	R	S	S		R			R	I	R		R		R	R					mec+, Type 5	Clinical				S	R	R	S	S		R			R	R	R		R
80418	2008	CANINE			skin	25	34	30		S	S	S	S		S			S	S	S		S		S	S						Referral				S	S	S	S	S		S			S	S	S		S
80775	2008	CANINE	SHETLAND SHEEPDOG	MALE CASTRATED	skin	6	21	10		S	R	S	S		R			R	I	R		R		R	R					mec+, Type 5	Clinical				S	R	R	S	S		R			R	R	R		R
094325	2009	CANINE	BORDER COLLIE	MALE CASTRATED	urine	22	33	30		S	R	S	S		S			S	S	S		R		S	S						Clinical				S	R	S	S	S		S			S	S	S		R
092971	2009	CANINE			skin	18	35	30		S	R	S	S		S			S	S	S		R		S	S						Referral				S	R	S	S	S		S			S	S	S		R
070602	2007	CANINE	SCOTTISH TERRIER	MALE CASTRATED	skin	22	32	30		S	R	S	S		S			S	S	S		R		S	S						Referral				S	R	S	S	S		S			S	S	S		R
070602	2007	CANINE	SCOTTISH TERRIER	MALE CASTRATED	skin	26	34	28		S	S	S	S		S			S	S	S		S		S	S						Referral				S	S	S	S	S		S			S	S	S		S
063604	2006	CANINE	BOXER		skin	9	23	13		S	R	S	S		R			R	S	R		R		R	R		>256			Type 5	Referral	No	No		S	R	R	S	S		R			R	S	R		R
83202	2008	CANINE			skin	21	33	30		S	R	S	S		S			S	S	S		R		S	I						Referral				S	R	S	S	S		S			S	S	S		R
85331	2008	CANINE			bone	22	35			S	R	S	S		S			S	S	S		R		S	I						Referral				S	R		S	S		S			S	S	S		R
092569	2009	CANINE			ear	20	34	29		S	R	S	S		S			S	S	S		R		S	S					Neg	Referral				S	R	S	S	S		S			S	S	S		R
80360	2008	CANINE	COCKER SPANIEL	FEMALE SPAYED	skin	6	23	6		S	R	S	S		R			R	R	R		R		R	R					mec+, Type 5	Clinical				S	R	R	S	S		R			R	R	R		R
80373	2008	CANINE	COCKER SPANIEL	FEMALE SPAYED	ear	6	22	6	S	S	R	S	S		R	S		R	I	R		R	S	R	R					mec+, Type 5	Clinical			S	S	R	R	S	S		R	S		R	R	R		R	S
80706	2008	CANINE	COCKER SPANIEL	FEMALE SPAYED	ear	12	26	17		S	R	S	S		R			R	S	R		R		R	R					mec+, Type 5	Clinical				S	R	R	S	S		R			R	S	R		R
070759	2007	CANINE			eye	17	32	22		S	R	S	S	S	R			R	S	S		R		S	S					mec+, no band*	Referral				S	R	S	S	S	S	R			R	S	S		R
062800	2006	CANINE	MIXED BREED DOG	MALE CASTRATED	skin	26	37	33		S	R	S	S		S			S	S	S		R		S	S				0		Clinical	No	No		S	R	S	S	S		S			S	S	S		R
091946	2009	CANINE			skin	19	33	29		S	R	S	S		S			S	S	S		R		R	S						Referral				S	R	S	S	S		S			S	S	S		R
063399	2006	CANINE	STANDARD SCHNAUZER 30-40LBS		urine	24	33	31		S	R	S	S		S			S	S	S		R		R	S					0	Referral	No	No		S	R	S	S	S		S			S	S	S		R
062126	2006	CANINE	COCKER SPANIEL	MALE CASTRATED	skin	12	25	15		S	R	S	S		R			R	S	R		R		R	R		>256		28.5	Type 5 (PCR)	Clinical	No	No		S	R	R	S	S		R			R	S	R		R
064544	2006	CANINE	MIXED BREED DOG	MALE CASTRATED	skin	24	30	30		S	S	S	S		S			S	S	S		S		S	S					0	Referral	No	No		S	S	S	S	S		S			S	S	S		S
090472	2009	CANINE			skin	26	40			S	R	S	S		S			S	S	S		R		S	S						Referral				S	R		S	S		S			S	S	S		R
060670	2006	CANINE	GERMAN SHEPHERD DOG	MALE CASTRATED	joint	20	27	24		S	R	S	S		S			S	S	S		R		S	S				40.41		Clinical	No	No		S	R	S	S	S		S			S	S	S		R
071891	2007	CANINE	BOSTON TERRIER	FEMALE SPAYED	ear	27	36	34		S	S	S	S		S			S	S	S		S		S	I						Referral				S	S	S	S	S		S			S	S	S		S
071686	2007	CANINE			ear	23	35	32		S	S	S	S		S			S	S	S		S		S	S						Referral				S	S	S	S	S		S			S	S	S		S
072357	2007	CANINE	MIXED BREED DOG	FEMALE SPAYED	ear	21	29	28		S	R	S	S		S			S	S	S		R		R	S						Referral				S	R	S	S	S		S			S	S	S		R
065429	2006	CANINE	BLOODHOUND	MALE CASTRATED	ear	26	36	31		S	R	S	S		S			S	S	R		R		S	S					0	Clinical	No	No		S	R	S	S	S		S			S	S	R		R
81083a	2008	CANINE	SHIH TZU	FEMALE SPAYED	skin	22	34	31		S	R	S	S		S			S	S	S		R		R	I						Clinical				S	R	S	S	S		S			S	S	S		R
81083b	2008	CANINE	SHIH TZU	FEMALE SPAYED	skin	22	34	29		S	R	S	S		S			S	S	S		R		S	S						Clinical				S	R	S	S	S		S			S	S	S		R
81466	2008	CANINE	SHIH TZU	FEMALE SPAYED	ear	22	34	32		S	R	S	S		S			S	S	S		R		S	S						Clinical				S	R	S	S	S		S			S	S	S		R
80690	2008	CANINE	DACHSHUND	MALE CASTRATED	skin	9	22	13		S	R	S	S		R			R	S	S		R		R	R					mec+, Type 5	Clinical				S	R	R	S	S		R			R	S	S		R
81164	2008	CANINE	DACHSHUND	MALE CASTRATED	skin	9	16	10		S	R	S	S		S			S	R	R		R		S	S					mec+, Type 3	Clinical				S	R	R	S	S		S			S	R	R		R
071148	2007	CANINE	SHIH TZU	FEMALE SPAYED	urine	26	36	30		S	R	S	S		S			S	S	S		R		S	S						Clinical				S	R	S	S	S		S			S	S	S		R
071556	2007	CANINE	BOSTON TERRIER	MALE CASTRATED	skin	26	36	36		S	S	S	S		S			S	S	S		S		S	S						Clinical				S	S	S	S	S		S			S	S	S		S
072124	2007	CANINE	BOSTON TERRIER	MALE CASTRATED	skin	9	23	12		S	R	S	S		R			R	S	R		R		R	R					mec+, Type 5	Clinical				S	R	R	S	S		R			R	S	R		R
063960	2006	CANINE	MIXED BREED DOG	MALE CASTRATED	ear	11	24	13		S	R	S	S		R			R	S	R		R		R	R		>256			Type 5	Clinical	No	No		S	R	R	S	S		R			R	S	R		R
072636	2007	CANINE			ear	16	34	21		S	S	S	S		S			S	R	S		S		S	S					mec+, Type 5	Referral				S	S	S	S	S		S			S	R	S		S
074181	2007	CANINE	MIXED BREED DOG	MALE CASTRATED	ear	6	21	6		R	R	S	S		R			R	I	R		R		R	R					mec+, Type 5	Clinical				R	R	R	S	S		R			R	R	R		R
061265	2006	CANINE			ear	27	35	32		S	S	S	S		S			S	S	S		S		S	S				n/a		Referral	No	No		S	S	S	S	S		S			S	S	S		S
83223	2008	CANINE			skin	17	22	18		S	R	S	S		S			S	S	S		R		S	S						Referral				S	R	R	S	S		S			S	S	S		R
061913	2006	CANINE	MIXED BREED DOG	FEMALE SPAYED	ear	23	26	20		S	S	S	S		S			S	S	S		S		S	S				0		Referral	No	No		S	S	R	S	S		S			S	S	S		S
061967	2006	CANINE	GERMAN SHEPHERD DOG	FEMALE SPAYED	skin	25	34	30		S	R	S	S		S			S	S	S		R		S	S				37		Referral	No	No		S	R	S	S	S		S			S	S	S		R
071126	2007	CANINE			joint	6	17	6		R	R	R	S		R			R	S	R		R		R	R					mec+, Type 5	Referral				R	R	R	R	S		R			R	S	R		R
074437	2007	CANINE	WEST HIGHLAND WHITE TERRIER	MALE	urine	23	36	31		S	R	S	S		S			S	S	S		R		S	S						Clinical				S	R	S	S	S		S			S	S	S		R
092487	2009	CANINE	BRITTANY SPANIEL	FEMALE SPAYED	skin	18	34	31		S	R	S	S		S			S	S	S		R		S	S					Neg	Referral				S	R	S	S	S		S			S	S	S		R
81160	2008	CANINE	PUG	FEMALE SPAYED	urine	25	34	31		S	S	S	S		S			S	S	S		S		S	S						Referral				S	S	S	S	S		S			S	S	S		S
81332	2008	CANINE	SIBERIAN HUSKY	FEMALE SPAYED	bone	6	18	6		R	R	R	S		R			R	I	R		R		R	R					mec+, Type 5	Clinical				R	R	R	R	S		R			R	R	R		R
092613	2009	CANINE			skin	23	28	25		S	R	S	S		R			R	R	S		R		R	R					Neg	Referral				S	R	S	S	S		R			R	R	S		R
064659	2006	CANINE	SHIH TZU	FEMALE SPAYED	urine	6	24	13		S	R	S	S		R			R	S	R		R		R	R		>256			Type 5	Clinical	No	No		S	R	R	S	S		R			R	S	R		R
072544	2007	CANINE			ear	6	26	6		S	R	S	R		R			R	S	S		R		S	R					mec+, no band*	Referral				S	R	R	S	R		R			R	S	S		R
090321	2009	CANINE	POMERANIAN	MALE CASTRATED	ear	20	34			S	R	S	S		R			R	S	S		R		S	S					Neg	Clinical				S	R		S	S		R			R	S	S		R
075781	2007	CANINE	MIXED BREED DOG	MALE CASTRATED	skin	6	23	6		R	R	S	S		R			R	I	R		R		R	R					mec+, Type 5	Clinical				R	R	R	S	S		R			R	R	R		R
075843	2007	CANINE	MIXED BREED DOG	MALE CASTRATED	skin	6	23	6		R	R	S	S		R			R	I	R		R		R	R					mec+, Type 5	Clinical				R	R	R	S	S		R			R	R	R		R
076146	2007	CANINE	MIXED BREED DOG	MALE CASTRATED	skin	6	21	6		I	R	S	S		R		R	R	S			R		R	R					mec +, Type 5	Clinical				R	R	R	S	S		R		R	R	S			R
80022	2008	CANINE	MIXED BREED DOG	MALE CASTRATED	skin	6	23	6		R	R	S	S		R			R	S	R		R		R	R					mec+, Type 5	Clinical				R	R	R	S	S		R			R	S	R		R
82680	2008	CANINE			skin	20	34	20		S	R	S	R		R			R	R	R		R		R	R					0, no band	Referral				S	R	R	S	R		R			R	R	R		R
060447c	2006	CANINE			skin	26	38	30		S	S	S	S		S			S	S	S		S		S	S				39.8		Referral	No	No		S	S	S	S	S		S			S	S	S		S
060447d	2006	CANINE			skin	22	37	30		S	R	S	S		S			S	S	S		R		S	S				0		Referral	No	No		S	R	S	S	S		S			S	S	S		R
063154	2006	CANINE	COCKER SPANIEL	FEMALE SPAYED	skin	22	37	32		S	R	S	S		R			R	S	S		R		R	S		0.19		39.19		Referral	No	No		S	R	S	S	S		R			R	S	S		R
072409	2007	CANINE	COCKER SPANIEL	FEMALE SPAYED	ear	22	37	32		S	R	S	S		R			R	S	S		R		R	S						Referral				S	R	S	S	S		R			R	S	S		R
075110	2007	CANINE	COCKER SPANIEL	FEMALE SPAYED	skin	21	35	30		S	R	S	S		R			R	S	S		R		R	S						Clinical				S	R	S	S	S		R			R	S	S		R
075111	2007	CANINE	COCKER SPANIEL	FEMALE SPAYED	skin	21	34	30		S	R	S	S		R			R	S	S		R		R	S						Clinical				S	R	S	S	S		R			R	S	S		R
070366	2007	CANINE			urine	24	35	33		S	R	S	S		S			S	S	S		R		S	S					Neg	Referral				S	R	S	S	S		S			S	S	S		R
072583	2007	CANINE			ear	24	35	31		S	R	S	S		S			S	S	S		R		R	S						Referral				S	R	S	S	S		S			S	S	S		R
84241	2008	CANINE	MIXED BREED DOG	MALE CASTRATED	nasal	23	34	22		S	R	S	S		S			S	S	S		R		S	S						Clinical				S	R	S	S	S		S			S	S	S		R
84614	2008	CANINE	BEAGLE	MALE CASTRATED	tracheal	19	25	22		S	R	S	S		S			S	S	S		R		S	S						Clinical				S	R	S	S	S		S			S	S	S		R
090610	2009	CANINE			bone	19	33			S	R	S	S		S			S	S	S		R		S	S						Referral				S	R		S	S		S			S	S	S		R
094323	2009	CANINE			skin	20	31	28		S	R	S	S		S			S	S	S		R		R	S						Referral				S	R	S	S	S		S			S	S	S		R
063905	2006	CANINE	LABRADOR RETRIEVER	MALE	ear	22	35	32		S	R	S	S		R			R	R	S		R		S	S		0.25			0	Referral	No	No		S	R	S	S	S		R			R	R	S		R
070905	2007	CANINE	COLLIE	MALE	skin	20	40	30		S	S	S	S		S			S	S	S		S		S	S						Clinical				S	S	S	S	S		S			S	S	S		S
070905	2007	CANINE	COLLIE	MALE	skin	20	28	27		S	R	S	S		S			S	S	S		R		S	S						Clinical				S	R	S	S	S		S			S	S	S		R
071549	2007	CANINE	COLLIE	MALE	skin	7	24	12		S	R	S	S		R			R	S	R		R		R	R					mec+, Type 5	Clinical				S	R	R	S	S		R			R	S	R		R
072808	2007	CANINE	COLLIE	MALE	skin	23	28	33		S	S	S	S		S			S	S	S		S		S	S						Clinical				S	S	S	S	S		S			S	S	S		S
83135	2008	CANINE	PEKINGESE	MALE	skin	6	21	6	S	R	R	I	S		R	I		R	S	R	I	R	S	R	R						Clinical			S	R	R	R	R	S		R	R		R	S	R	R	R	S
092095c	2009	CANINE			skin	6	12	6		R	R	R	S		S			S	S	S		R		S	S					POS	Referral				R	R	R	R	S		S			S	S	S		R
094448	2009	CANINE	BOXER	MALE	skin	6	21	7		S	R	S	S		R			R	I	R		R		R	R					POS	Referral				S	R	R	S	S		R			R	R	R		R
094710	2009	CANINE	PUG	FEMALE	eye	23	34	29		S	S	S	S	S				S	S	S		S			S						Clinical				S	S	S	S	S	S				S	S	S		S
062586	2006	CANINE			urine	24	37	33		S	R	S	S		S			S	S	S		R		S	S				39.66		Referral	No	No		S	R	S	S	S		S			S	S	S		R
090458a	2009	CANINE	GOLDEN RETRIEVER	FEMALE SPAYED	bone	6	6			R	R	R	S		R			R	S	R		R		S	S					POS	Clinical				R	R		R	S		R			R	S	R		R
090459	2009	CANINE	GOLDEN RETRIEVER	FEMALE SPAYED	bone	6	6			R	R	R	S		R			R	S	R		R		S	S					POS	Clinical				R	R		R	S		R			R	S	R		R
090745	2009	CANINE	GERMAN SHEPHERD DOG	FEMALE SPAYED	skin	20	33			S	R	S	S		S			S	S	S		R		S	I						Clinical				S	R		S	S		S			S	S	S		R
094656	2009	CANINE	GERMAN SHEPHERD DOG	FEMALE SPAYED	skin	21	34	28		S	R	S	S		S			S	S	S		R		S	I						Clinical				S	R	S	S	S		S			S	S	S		R
075226a	2007	CANINE			urine	20	34	28		S	R	S	S		R			R	S	S		R		S	S					Neg	Referral				S	R	S	S	S		R			R	S	S		R
075226b	2007	CANINE			urine	17	31	24		S	R	S	S		R			R	S	S		R		S	I					0, no band	Referral				S	R	S	S	S		R			R	S	S		R
070372	2007	CANINE			ear	16	26	18		S	R	S	S		R			R	R	R		R		R	R					mec+, Type 5	Referral				S	R	R	S	S		R			R	R	R		R
073264b	2007	CANINE			ear	21	35	28		S	R	S	S		S			S	S	S		R		R	S						Referral				S	R	S	S	S		S			S	S	S		R
073264d	2007	CANINE			ear	25	35	30		S	S	S	S		S			S	S	S		S		S	S						Referral				S	S	S	S	S		S			S	S	S		S
091028	2009	CANINE	POINTER,GERMAN SHORTHAIRED	FEMALE SPAYED	skin	19	32	27		S	R	S	S		S			S	S	S		R		S	S						Referral				S	R	S	S	S		S			S	S	S		R
094303	2009	CANINE			skin	8	22	6	S	S	R	S	S		R	I		R	I	R	R	R	S	R	R					POS	Referral			S	S	R	R	S	S		R	R		R	R	R	R	R	S
071801	2007	CANINE	LABRADOR RETRIEVER	MALE	joint	14	26	16		S	R	S	S		R			R	S	R		R		R	R					mec+, Type 5	Clinical				S	R	R	S	S		R			R	S	R		R
072385	2007	CANINE	LABRADOR RETRIEVER	MALE	bone	12	26	16		S	R	S	S		R			R	I	R		R		R	R					mec+, Type 5	Clinical				S	R	R	S	S		R			R	R	R		R
063965	2006	CANINE			urine	23	37	35		S	R	S	S		S			S	S	S		R		R	S					0	Referral	No	No		S	R	S	S	S		S			S	S	S		R
84917	2008	CANINE	BICHON FRISE	FEMALE SPAYED	urine	26	36	31		S	S	S	S		S			S	S	S		S		S	S						Clinical				S	S	S	S	S		S			S	S	S		S
070728	2007	CANINE	GOLDEN RETRIEVER	FEMALE	vaginal	25	37	33		S	R	S	S		R			R	S	S		R		S	S						Clinical				S	R	S	S	S		R			R	S	S		R
073545	2007	CANINE	GOLDEN RETRIEVER	FEMALE	skin	23	37	34		S	R	S	S		R			R	S	S		R		S	S						Clinical				S	R	S	S	S		R			R	S	S		R
80527	2008	CANINE	GOLDEN RETRIEVER	FEMALE	skin	21	36	31		S	R	S	S		R			R	S	S		R		S	S						Clinical				S	R	S	S	S		R			R	S	S		R
075109	2007	CANINE	YORKSHIRE TERRIER	MALE CASTRATED	skin	20	34	30		S	R	S	S		S			S	S	S		R		R	S						Clinical				S	R	S	S	S		S			S	S	S		R
094705	2009	CANINE	SHIH TZU	MALE CASTRATED	eye	22	34	29		S	R	S	S	S	S			S	S	S		R		S	S						Clinical				S	R	S	S	S	S	S			S	S	S		R
81038	2008	CANINE	CHIHUAHUA	FEMALE SPAYED	urine	23	26	20		S	S	S	S		S			S	S	S		S		S	S						Clinical				S	S	R	S	S		S			S	S	S		S
064596	2006	CANINE			ear	25	37	32		S	R	S	S		S			S	S	S		R		S	S					0	Referral	No	No		S	R	S	S	S		S			S	S	S		R
075227	2007	CANINE			ear	21	34	26		S	R	S	S		S			S	S	S		R		S	S						Referral				S	R	S	S	S		S			S	S	S		R
070123	2007	CANINE			ear	25	34	30		S	R	S	S		S			S	S	S		R		S	S					Neg	Referral				S	R	S	S	S		S			S	S	S		R
075350	2007	CANINE			ear	6	26	9		S	R	S	S	S	S			S	R	S		R		S	S					mec+, no band	Referral				S	R	R	S	S	S	S			S	R	S		R
075675	2007	CANINE	YORKSHIRE TERRIER	MALE CASTRATED	skin	23	34	28		S	S	S	S		S			S	S	S		S		S	S						Clinical				S	S	S	S	S		S			S	S	S		S
076197	2007	CANINE	WEST HIGHLAND WHITE TERRIER	FEMALE SPAYED	ear	22	32	28		S	R	S	S		S		S	S	S			R		S	S						Referral				S	R	S	S	S		S		S	S	S			R
81209	2008	CANINE	YORKSHIRE TERRIER	MALE CASTRATED	skin	21	34	30		S	R	S	S		R			R	S	S		R		R	R						Clinical				S	R	S	S	S		R			R	S	S		R
82099	2008	CANINE	SAINT BERNARD	MALE	eye	8	21	9		S		S	S	R	R			R	I	R		R		R	R					mec+, Type 5	Clinical				S		R	S	S	R	R			R	R	R		R
090181	2009	CANINE	AIREDALE TERRIER	MALE CASTRATED	skin	24	34			S	S	S	S		S			S	S	S		S		S	S					Neg	Referral				S	S		S	S		S			S	S	S		S
091844	2009	CANINE	BASSET HOUND	MALE CASTRATED	trach/bronch	20	35	30		S	R	S	S		S			S	S	S		R		S	S						Clinical				S	R	S	S	S		S			S	S	S		R
093005	2009	CANINE	FLAT-COATED RETRIEVER	MALE CASTRATED	skin	>20	>35	>35		S	S	S	S		S			S	S	S		S		S	S						Clinical				S	S	S	S	S		S			S	S	S		S
093621	2009	CANINE			skin	22	31	26		S	S	S	S		S			S	S	S		S		S	S						Referral				S	S	S	S	S		S			S	S	S		S
80627	2008	CANINE	BORDER COLLIE	MALE CASTRATED	skin	23	34	31		S	R	S	S		R			R	R	S		R		R	R						Clinical				S	R	S	S	S		R			R	R	S		R
074648	2007	CANINE	GERMAN SHEPHERD DOG	MALE	skin	24	32	29		S	S	S	S	S	S			S	S	S		S		S	S						Referral				S	S	S	S	S	S	S			S	S	S		S
072919	2007	CANINE	MIXED BREED DOG	FEMALE SPAYED	urine	20	35	31		S	R	S	S		S			S	S	S		R		R	S						Referral				S	R	S	S	S		S			S	S	S		R
075967	2007	CANINE	DACHSHUND	FEMALE SPAYED	urine	19	33	29		S	R	S	S		R			R	S	S		R		S	S						Clinical				S	R	S	S	S		R			R	S	S		R
84688	2008	CANINE	MIXED BREED DOG	FEMALE SPAYED	skin	21	34	30		S	R	S	S		S			S	S	S		R		S	S						Clinical				S	R	S	S	S		S			S	S	S		R
83822	2008	CANINE	STAFFORDSHIRE TERRIER	FEMALE SPAYED	urine	24	34	30		S	S	S	S		S			S	S	S		S		S	S						Referral				S	S	S	S	S		S			S	S	S		S
070828	2007	CANINE			ear	26	34	32		S	R	S	S		R			R	S	R		R		R	R						Referral				S	R	S	S	S		R			R	S	R		R
073910c	2007	CANINE	ENGLISH SETTER	FEMALE SPAYED	skin	21	35	23		S	R	S	S		S			S	S	S		R		R	S						Referral				S	R	S	S	S		S			S	S	S		R
073910d	2007	CANINE	ENGLISH SETTER	FEMALE SPAYED	skin	27	35	32		S	S	S	S		S			S	S	S		S		S	S						Referral				S	S	S	S	S		S			S	S	S		S
064292	2006	CANINE	MIXED BREED DOG	FEMALE SPAYED	urine	10	24	11		S	R	S	S		R			R	S	R		R		R	R		>256			Type 5	Clinical	No	No		S	R	R	S	S		R			R	S	R		R
065334	2006	CANINE	MIXED BREED DOG	FEMALE SPAYED	urine	13	26	13		S	R	S	S		R			R	S	R		R		R	R		>256			Type 5	Clinical	No	No		S	R	R	S	S		R			R	S	R		R
070117a	2007	CANINE	MIXED BREED DOG	FEMALE SPAYED	urine	6	23	6		S	R	S	S		R			R	S	R		R		R	R					mec+, Type 5	Clinical				S	R	R	S	S		R			R	S	R		R
070117b	2007	CANINE	MIXED BREED DOG	FEMALE SPAYED	urine	12	27	14		S	R	S	S		R			R	S	R		R		R	R					mec+, Type 5	Clinical				S	R	R	S	S		R			R	S	R		R
073519	2007	CANINE	BRITTANY SPANIEL	FEMALE	skin	13	27	18		S	R	S	S		S			S	S	S		R		S	S					mec+, no band*	Clinical				S	R	R	S	S		S			S	S	S		R
83838	2008	CANINE	ENGLISH BULLDOG	MALE CASTRATED	skin	19	33	29		S	R	S	S		S			S	S	S		R		S	I						Clinical				S	R	S	S	S		S			S	S	S		R
094523	2009	CANINE	PEKINGESE	FEMALE SPAYED	eye	25	33	31		S	R	S	S	S	S			S	S	S		R		S	S						Clinical				S	R	S	S	S	S	S			S	S	S		R
074789	2007	CANINE			skin	24	32	28		S	S	S	S		S			S	S	S		S		S	S						Referral				S	S	S	S	S		S			S	S	S		S
093553	2009	CANINE	LABRADOR RETRIEVER	FEMALE SPAYED	skin	21	33	29		S	R	S	S		S			S	S	S		R		R	S						Clinical				S	R	S	S	S		S			S	S	S		R
060600	2006	CANINE	COCKER SPANIEL	FEMALE SPAYED	ear	25	34	30		S	S	S	S		S			S	S	S		S		S	S				41.07		Clinical	No	No		S	S	S	S	S		S			S	S	S		S
060601	2006	CANINE	COCKER SPANIEL	FEMALE SPAYED	ear	28	35	30		S	S	S	S		S			S	S	S		S		S	S				42.74		Clinical	No	No		S	S	S	S	S		S			S	S	S		S
064455	2006	CANINE			ear	24	37	32		S	S	S	S		S			S	S	S		S		S	S				Neg		Referral	No	No		S	S	S	S	S		S			S	S	S		S
065263	2006	CANINE	SHAR-PEI	MALE CASTRATED	ear	10	23	13		S	R	S	S		R			R	I	R		R		R	R		>256			Type 5	Clinical	No	No		S	R	R	S	S		R			R	R	R		R
072367	2007	CANINE	MIXED BREED DOG	FEMALE SPAYED	skin	15	29	18		S	S	S	S		S			S	S	S		S		S	S					mec+, Type ???	Clinical				S	S	R	S	S		S			S	S	S		S
074512	2007	CANINE	MIXED BREED DOG	FEMALE SPAYED	skin	8	24	11		S	R	S	S		R			R	I	R		R		R	R					mec+, Type 5	Referral				S	R	R	S	S		R			R	R	R		R
075281	2007	CANINE	MIXED BREED DOG	FEMALE SPAYED	skin	8	23	8		S	R	S	S		R			R	I	R		R		R	R					mec+, Type 5	Referral				S	R	R	S	S		R			R	R	R		R
075581	2007	CANINE	MIXED BREED DOG	FEMALE SPAYED	skin	9	24	10		S	R	S	S		R			R	S	R		R		R	R						Clinical				S	R	R	S	S		R			R	S	R		R
80939	2008	CANINE	COCKER SPANIEL	FEMALE SPAYED	ear	24	32	28		S	S	S	S		S			S	I	S		S		S	S						Clinical				S	S	S	S	S		S			S	R	S		S
092132	2009	CANINE	COCKER SPANIEL	FEMALE SPAYED	ear	22	26	24		S	S	S	S		S			S	R	S		S		S	S						Clinical				S	S	S	S	S		S			S	R	S		S
093427	2009	CANINE	BULLMASTIFF	FEMALE SPAYED	skin	13	25	15	S	S	R	S	S		R	I		R	I	R	I	R	S	R	R					POS	Clinical			S	S	R	R	S	S		R	R		R	R	R	R	R	S
094634	2009	CANINE	MIXED BREED DOG	FEMALE SPAYED	skin	10	22	11	S	S	R	S	S		R	I		R	I	R	R	R	S	R	R					POS	Clinical			S	S	R	R	S	S		R	R		R	R	R	R	R	S
064215	2006	CANINE			skin	6	23	6		R	R	R	S		S			S	S	I		R		S	S				POS	0	Referral	No	No		R	R	R	R	S		S			S	S	R		R
81791	2008	CANINE			skin	21	35	30		S	R	S	S		R			R	S	S		R		S	S					0, no band	Referral				S	R	S	S	S		R			R	S	S		R
092970	2009	CANINE	COCKER SPANIEL	MALE CASTRATED	bone	6	18	6		R	R	R	S		S			S	S	S		R		S	S					POS	Clinical				R	R	R	R	S		S			S	S	S		R
85015	2008	CANINE	MALTESE DOG	FEMALE SPAYED	skin	22	34	30		S	R	S	S		S			S	S	S		R		S	S						Clinical				S	R	S	S	S		S			S	S	S		R
093650	2009	CANINE	ENGLISH BULLDOG	MALE CASTRATED	skin	6	26	12		S	R	S	S		S			S	R	R		R		S	S					POS	Referral				S	R	R	S	S		S			S	R	R		R
071042b	2007	CANINE	GOLDEN RETRIEVER	FEMALE SPAYED	ear	6	28	6		R	R	I	S		S			S	I	I		R		S	S					0, no band*	Clinical				R	R	R	R	S		S			S	R	R		R
071042c	2007	CANINE	GOLDEN RETRIEVER	FEMALE SPAYED	ear	6	26	12		S	R	S	S		S			S	S	R		R		S	S					0, no band*	Clinical				S	R	R	S	S		S			S	S	R		R
073351	2007	CANINE	GOLDEN RETRIEVER	FEMALE SPAYED	skin	6	24	10		S	R	S	S		R			R	I	R		R		R	R					mec+, Type 5	Clinical				S	R	R	S	S		R			R	R	R		R
074502	2007	CANINE			urine	27	35	30		S	R	S	S		S			S	S	S		R		S	S						Referral				S	R	S	S	S		S			S	S	S		R
094089	2009	CANINE			skin	6	20	6		R	R	S	S		S			S	R	R		R		S	S						Referral				R	R	R	S	S		S			S	R	R		R
060078	2006	CANINE	MIXED BREED DOG	FEMALE SPAYED	urine	23	33	28		S	R	S	S		S			S	S	S		R		S	S				40.31		Clinical	No	No		S	R	S	S	S		S			S	S	S		R
84687	2008	CANINE	CAVALIER KING CHARLES SPANIEL	FEMALE SPAYED	skin	20	32	28		S	R	S	S		S			S	S	R		R		S	I						Clinical				S	R	S	S	S		S			S	S	R		R
84693	2008	CANINE	CAVALIER KING CHARLES SPANIEL	FEMALE SPAYED	ear	18	32	28		S	R	S	S		S			S	S	S		R		S	S						Clinical				S	R	S	S	S		S			S	S	S		R
84694	2008	CANINE	CAVALIER KING CHARLES SPANIEL	FEMALE SPAYED	ear	21	36	29		S	R	S	S		S			S	S	R		R		S	S						Clinical				S	R	S	S	S		S			S	S	R		R
063364	2006	CANINE			ear	6	24	6		S	R	S	S		S		I	S	I	R		R		S	S					Type 3	Referral	No	No		S	R	R	S	S		S		R	S	R	R		R
076024	2007	CANINE	PORTUGESE WATER DOG	FEMALE SPAYED	ear	19	32	29		S	R	S	S	S				S	S			R		R	S						Clinical				S	R	S	S	S	S				S	S			R
092359	2009	CANINE			ear	26	34	30		S	S	S	S		S			S	S	S		S		S	S						Referral				S	S	S	S	S		S			S	S	S		S
060952	2006	CANINE	LABRADOR RETRIEVER	MALE CASTRATED	bone	15	27	18		S	R	S	S		R			R	I	R		R		R	R		2		27.15	Type 5 (361 bp)	Clinical	No	No		S	R	R	S	S		R			R	R	R		R
81626	2008	CANINE	LABRADOR RETRIEVER	MALE CASTRATED	joint	15	26	17		S	R	S	S		R			R	I	R		R		R	R					mec+, Type 5	Clinical				S	R	R	S	S		R			R	R	R		R
83230	2008	CANINE	LABRADOR RETRIEVER	MALE CASTRATED	bone	14	28	18		S	R	S	S		R			R	S	R		R		R	R						Clinical				S	R	R	S	S		R			R	S	R		R
83233	2008	CANINE	LABRADOR RETRIEVER	MALE CASTRATED	bone	14	26	17		S	R	S	S		R			R	S	R		R		R	R						Clinical				S	R	R	S	S		R			R	S	R		R
82291	2008	CANINE			ear	25	32	28		S		S	S		S			S	S	S		S		S	S					0, no band	Referral				S		S	S	S		S			S	S	S		S
84844	2008	CANINE	GOLDEN RETRIEVER	FEMALE SPAYED	skin	8	21	12	S	S	R	S	S		R	S		R	S	R	I	R	S	R	R						Clinical			S	S	R	R	S	S		R	S		R	S	R	R	R	S
074854a	2007	CANINE	LABRADOR RETRIEVER	MALE CASTRATED	skin	20	34	30		S	R	S	S		S			S	S	S		R		S	S						Clinical				S	R	S	S	S		S			S	S	S		R
074854b	2007	CANINE	LABRADOR RETRIEVER	MALE CASTRATED	skin	13	25	17		S	R	S	S		R			R	S	S		R		R	R					mec+, no band*	Clinical				S	R	R	S	S		R			R	S	S		R
83825	2008	CANINE			skin	7	34	11	S	S	R	S	S		R	I		R	R	R	I	R	S	R	R						Referral			S	S	R	R	S	S		R	R		R	R	R	R	R	S
072797	2007	CANINE			ear	20	34	31		S	R	S	S		S			S	S	S		R		S	S						Referral				S	R	S	S	S		S			S	S	S		R
82999	2008	CANINE	BOXER	MALE CASTRATED	skin	9	22	11	S	S	R	S	S		R	I		R	I	R	I	R	S	R	R					mec+,	Clinical			S	S	R	R	S	S		R	R		R	R	R	R	R	S
84328a	2008	CANINE	BOXER	MALE CASTRATED	skin	6	22	8	S	S	R	S	S		R	I		R	S	R	I	R	S	R	R						Clinical			S	S	R	R	S	S		R	R		R	S	R	R	R	S
84328b	2008	CANINE	BOXER	MALE CASTRATED	skin	25	36	31		S	S	S	S		S			S	S	S		S		S	S						Clinical				S	S	S	S	S		S			S	S	S		S
064412	2006	CANINE	DACHSHUND	MALE CASTRATED	skin	22	35	30		S	R	S	S		S			S	S	S		R		R	S					0	Clinical	No	No		S	R	S	S	S		S			S	S	S		R
075755	2007	CANINE			skin	22	36	34		S	R	S	S		S			S	S	S		R		R	S						Referral				S	R	S	S	S		S			S	S	S		R
911093	2009	CANINE	GERMAN SHEPHERD DOG		skin	18	33	30		S	R	S	S		S			S	S	S		R		R	S						Referral				S	R	S	S	S		S			S	S	S		R
071362	2007	CANINE			joint	14	25	17		S	R	S	S	R	R		R	R	I	R		R		R	S					mec+, Type 5	Referral				S	R	R	S	S	R	R		R	R	R	R		R
073252	2007	CANINE	ENGLISH BULLDOG	FEMALE SPAYED	bone	13	25	15		S	R	S	S		R			R	R	R		R		R	R					mec+, Type 5	Clinical				S	R	R	S	S		R			R	R	R		R
073131	2007	CANINE			nasal	24	33	30		S	S	S	S		S			S	S	S		S		S	S						Referral				S	S	S	S	S		S			S	S	S		S
85776	2008	CANINE	COCKER SPANIEL	FEMALE SPAYED	ear	18	31			S	R	S	S		S			S	S	S		R		S	S						Clinical				S	R		S	S		S			S	S	S		R
85777	2008	CANINE	COCKER SPANIEL	FEMALE SPAYED	ear	19	31			S	R	S	S		S			S	S	S		R		S	S						Clinical				S	R		S	S		S			S	S	S		R
85823	2008	CANINE	COCKER SPANIEL	FEMALE SPAYED	ear	6	23		S	S	R	S	S		R	I		R	S	R	I	R	S	R	R						Clinical			S	S	R		S	S		R	R		R	S	R	R	R	S
85823	2008	CANINE	COCKER SPANIEL	FEMALE SPAYED	ear	23	33			S	S	S	S		S			S	S	S		S		S	S						Clinical				S	S		S	S		S			S	S	S		S
090031	2009	CANINE	ROTTWEILER	FEMALE SPAYED	bone	20	34			S	R	S	S		S			S	S	S		R		R	R					Neg	Clinical				S	R		S	S		S			S	S	S		R
090751	2009	CANINE	ROTTWEILER	FEMALE SPAYED	joint	20	33			S	R	S	S		S			S	S	S		R		R	R						Clinical				S	R		S	S		S			S	S	S		R
092104a	2009	CANINE	ROTTWEILER	FEMALE SPAYED	bone	6	6	6		S	R	S	S		R			R	S	S		R		S	S					POS	Clinical				S	R	R	S	S		R			R	S	S		R
092104d	2009	CANINE	ROTTWEILER	FEMALE SPAYED	bone	17	34	29		S	R	S	S	S	S			S	S	S		R	S	S	S	=0.25				Neg	Clinical				S	R	S	S	S	S	S			S	S	S		R	S
094591	2009	CANINE			ear	20	33	29		S	R	S	R		R			R	R	S		R		R	S						Referral				S	R	S	S	R		R			R	R	S		R
063238	2006	CANINE	STAFFORDSHIRE TERRIER	FEMALE SPAYED	skin	25	34	31		S	S	S	S		S			S	S	S		S		S	S					0	Referral	No	No		S	S	S	S	S		S			S	S	S		S
071300	2007	CANINE	STAFFORDSHIRE TERRIER	FEMALE SPAYED	skin	22	34	30		S	R	S	S		S			S	S	S		R		S	R						Clinical				S	R	S	S	S		S			S	S	S		R
071301	2007	CANINE	STAFFORDSHIRE TERRIER	FEMALE SPAYED	skin	26	36	33		S	S	S	S		S			S	S	S		S		S	S						Clinical				S	S	S	S	S		S			S	S	S		S
071882	2007	CANINE	LABRADOR RETRIEVER	MALE	skin	23	35	32		S	R	S	S		S			S	S	S		R		S	R						Clinical				S	R	S	S	S		S			S	S	S		R
074699	2007	CANINE	STAFFORDSHIRE TERRIER	FEMALE SPAYED	skin	6	22	6		R	R	S	S		R			R	I	R		R		R	R					mec+, Type 5	Clinical				R	R	R	S	S		R			R	R	R		R
075537	2007	CANINE	STAFFORDSHIRE TERRIER	FEMALE SPAYED	skin	6	22	6		S	R	S	S		R			R	S	R		R		R	R					mec+, Type 5	Clinical				S	R	R	S	S		R			R	S	R		R
090559	2009	CANINE	STAFFORDSHIRE TERRIER	FEMALE SPAYED	skin	19	34			S	R	S	S		S			S	S	S		R		S	S						Clinical				S	R		S	S		S			S	S	S		R
092464	2009	CANINE	STAFFORDSHIRE TERRIER	FEMALE SPAYED	skin	21	34	30		S	R	S	S		S			S	S	S		R		R	S					Neg	Clinical				S	R	S	S	S		S			S	S	S		R
85198	2008	CANINE	SHIH TZU	FEMALE SPAYED	nasal	20	34	31		S	R	S	S		R			R	R	S		R		R	R						Clinical				S	R	S	S	S		R			R	R	S		R
074225	2007	CANINE			skin	23	36	32		S	R	S	S		S			S	S	S		R		S	S						Referral				S	R	S	S	S		S			S	S	S		R
093130	2009	CANINE	WEST HIGHLAND WHITE TERRIER	FEMALE SPAYED	skin	23	34	30		S	S	S	S		S			S	S	S		S		R	S						Clinical				S	S	S	S	S		S			S	S	S		S
093692	2009	CANINE	WEST HIGHLAND WHITE TERRIER	FEMALE SPAYED	skin	19	33	26		S	S	S	S		S			S	S	S		S		R	S					Neg	Clinical				S	S	S	S	S		S			S	S	S		S
092582	2009	CANINE	PEMBROKE WELSH CORGI	FEMALE SPAYED	urine	22	33	29		S	S	S	S		S			S	S	S		S		S	S					Neg	Clinical				S	S	S	S	S		S			S	S	S		S
092591	2009	CANINE	PEMBROKE WELSH CORGI	FEMALE SPAYED	urine	24	30	30		S	S	S	S		S			S	S	S		S		S	S					Neg	Clinical				S	S	S	S	S		S			S	S	S		S
063010	2006	CANINE	MIXED BREED DOG	FEMALE SPAYED	nasal	24	34	30		S	R	S	S		R			R	S	S		R		R	R		0.25		38.37		Referral	No	No		S	R	S	S	S		R			R	S	S		R
063010	2006	CANINE	MIXED BREED DOG	FEMALE SPAYED	nasal	26	34	28		S	S	S	S		S			S	S	S		S		S	S				38.78		Referral	No	No		S	S	S	S	S		S			S	S	S		S
092614	2009	CANINE			ear	18	33	28		S	R	S	S		S			S	S	S		R		S	S					Neg	Referral				S	R	S	S	S		S			S	S	S		R
82324	2008	CANINE			ear	23	34	29		S		S	S		S			S	S	S		S		S	S					0, no band	Referral				S		S	S	S		S			S	S	S		S
075354	2007	CANINE	SHIH TZU	MALE CASTRATED	skin	6	23	6		S	R	S	S		R			R	S	R		R		R	R					mec+, Type 5	Clinical				S	R	R	S	S		R			R	S	R		R
070980	2007	CANINE	CHOW CHOW	MALE	urine	>30	>30	>30		S	R	S	S		S			S	S	R		R		S	R						Referral				S	R	S	S	S		S			S	S	R		R
072980	2007	CANINE			bone	6	8	6		R	R	S	S		R			R	S	R		R		S	S					mec+, Type 2	Referral				R	R	R	S	S		R			R	S	R		R
074114	2007	CANINE	STAFFORDSHIRE TERRIER	FEMALE SPAYED	skin	21	34	30		S	R	S	S		S			S	S	S		R		S	S						Clinical				S	R	S	S	S		S			S	S	S		R
092120	2009	CANINE			skin	16	25	18		S	R	S	S		R			R	S	R		R		S	S						Referral				S	R	R	S	S		R			R	S	R		R
85627	2008	CANINE			skin	18	34			S	R	S	S		S			S	S	S		R		S	S						Referral				S	R		S	S		S			S	S	S		R
062401	2006	CANINE	IRISH SETTER	MALE	skin	6	20	6		R	R	S	S		R			R	S	R		R		R	R		>256		26.23	Type 5	Clinical	No	No		R	R	R	S	S		R			R	S	R		R
83090	2008	CANINE			ear	26	35	30		S	S	S	S		S			S	S	S		S		S	S						Referral				S	S	S	S	S		S			S	S	S		S
83023	2008	CANINE	CHESAPEAKE BAY RETRIEVER	FEMALE SPAYED	urine	28	34	32		S	R	S	S		S			S	S	S		R		S	S					0,	Clinical				S	R	S	S	S		S			S	S	S		R
83550	2008	CANINE	IRISH SETTER	FEMALE SPAYED	skin	6	18	6		R	R	R	S		R			R	S	R		R		R	R						Clinical				R	R	R	R	S		R			R	S	R		R
070019	2007	CANINE			urine	30	38	34		S	R	S	S		S			S	S	S		R		S	S					Neg	Referral				S	R	S	S	S		S			S	S	S		R
075066	2007	CANINE	STANDARD POODLE	MALE CASTRATED	skin	14	26	18		S	R	S	R		R			R	R	R		R		R	R					mec+, no band*	Clinical				S	R	R	S	R		R			R	R	R		R
075298	2007	CANINE	LABRADOR RETRIEVER	MALE CASTRATED	skin	11	26	13		S	R	S	S		R			R	I	R		R		R	R					mec+, Type 5	Clinical				S	R	R	S	S		R			R	R	R		R
091251	2009	CANINE			urine	20	36	32		S	R	S	S		S			S	S	S		R		S	S						Referral				S	R	S	S	S		S			S	S	S		R
83259b	2008	CANINE	MIXED BREED DOG	MALE CASTRATED	skin	25	33	25		S	S	S	S		S			S	S	S		S		R	S						Clinical				S	S	S	S	S		S			S	S	S		S
83259c	2008	CANINE	MIXED BREED DOG	MALE CASTRATED	skin	6	25	6	S	S	R	S	S		S	I		S	S	S	I	R	S	R	I						Clinical			S	S	R	R	S	S		S	R		S	S	S	R	R	S
063439	2006	CANINE	YORKSHIRE TERRIER	FEMALE SPAYED	ear	15	36	30		S	R	S	S		S			S	S	S		R		S	S						Clinical	No	No		S	R	S	S	S		S			S	S	S		R
81675	2008	CANINE			skin	20	33	28		S	R	S	S		S			S	S	S		R		S	I						Referral				S	R	S	S	S		S			S	S	S		R
090960	2009	CANINE			skin	13	26	17		S	R	S	S		S			S	S	S		R		S	S					POS	Referral				S	R	R	S	S		S			S	S	S		R
070431	2007	CANINE			skin	26	36	32		S	R	S	S		S			S	S	S		R		S	S						Referral				S	R	S	S	S		S			S	S	S		R
072309	2007	CANINE	DOBERMAN PINSCHER	MALE CASTRATED	skin	23	32	29		S	R	S	S		S			S	S	S		R		S	S						Clinical				S	R	S	S	S		S			S	S	S		R
093769	2009	CANINE	PUG	MALE	ear	6	26	12		S	R	S	S		S			S	S	I		R		S	S					POS	Referral				S	R	R	S	S		S			S	S	R		R
075378	2007	CANINE	MIXED BREED DOG	MALE CASTRATED	skin	6	21	6		S	R	S	S		R			R	S	R		R		R	R					mec+, Type 5	Clinical				S	R	R	S	S		R			R	S	R		R
82195	2008	CANINE	MIXED BREED DOG	MALE CASTRATED	nasal/axilla	6	17	6		R		R	S		R			R	S	R		R		R	R					mec+, Type 5	Clinical				R		R	R	S		R			R	S	R		R
062142	2006	CANINE			ear	22	33	29		S	R	S	S		S			S	S	S		R		S	S				0		Referral	No	No		S	R	S	S	S		S			S	S	S		R
063396	2006	CANINE	PLOTT HOUND	MALE	skin	21	35	30		S	R	S	S		R			R	R	S		R		R	I		0.25			0	Clinical	No	No		S	R	S	S	S		R			R	R	S		R
85613	2008	CANINE	POMERANIAN	MALE CASTRATED	skin	9	24		S	S	R	S	S		R	S		R	S	R	I	R	S	R	R						Clinical			S	S	R		S	S		R	S		R	S	R	R	R	S
090950	2009	CANINE	POMERANIAN	MALE CASTRATED	skin	8	26	13	S	S	R	S	S		R	I		R	I	R		R	S	R	R					POS	Clinical			S	S	R	R	S	S		R	R		R	R	R		R	S
091134	2009	CANINE	GOLDEN RETRIEVER	FEMALE SPAYED	skin	17	32	29		S	R	S	S		S			S	S	S		R		S	S	=0.25					Clinical				S	R	S	S	S		S			S	S	S		R
093449	2009	CANINE			skin	6	24	6		S	R	S	S		S			S	R	I		R		S	S					POS	Referral				S	R	R	S	S		S			S	R	R		R
094099	2009	CANINE			skin	6	25	9		S	R	S	S		S			S	S	R		R		S	S					POS	Referral				S	R	R	S	S		S			S	S	R		R
81752	2008	CANINE			urine	22	36	33		S	R	S	S		R			R	S	S		R		R	S					0, no band	Referral				S	R	S	S	S		R			R	S	S		R
82451	2008	CANINE			eye	19	34	30		S		S	S	S	S			S	S	S		R		R	S					0, no band	Referral				S		S	S	S	S	S			S	S	S		R
064031	2006	CANINE	BICHON FRISE	FEMALE SPAYED	urine	21	37	34		S	R	S	S		S			S	S	R		R		S	R		0.25			0	Referral	No	No		S	R	S	S	S		S			S	S	R		R
82158	2008	CANINE	YORKSHIRE TERRIER	MALE	testicle	17	25	22		R		S	S		S			S	S	S		R		S	S					0, no band	Referral				R		S	S	S		S			S	S	S		R
092506b	2009	CANINE			skin	20	36	31		S	R	S	S		S			S	S	S		R		S	S					Neg	Referral				S	R	S	S	S		S			S	S	S		R
092506d	2009	CANINE			skin	6	23	6		R	R	R	S		I			S	R	S		R		S	S					POS	Referral				R	R	R	R	S		R			S	R	S		R
062585	2006	CANINE	MIXED BREED DOG	FEMALE SPAYED	urine	28	37	32		S	S	S	S		S			S	S	S		S		R	S				39.32		Referral	No	No		S	S	S	S	S		S			S	S	S		S
064517	2006	CANINE	MIXED BREED DOG	FEMALE SPAYED	urine	23	38	36		S	R	S	S		S			S	S	S		R		S	S					0	Referral	No	No		S	R	S	S	S		S			S	S	S		R
065794	2006	CANINE	MIXED BREED DOG	FEMALE SPAYED	urine	24	34	30		S	R	S	S		S			S	S	S		R		R	S		0.19			0	Referral	No	No		S	R	S	S	S		S			S	S	S		R
073311	2007	CANINE	MIXED BREED DOG	FEMALE SPAYED	urine	21	35	30		S	R	S	S		S			S	S	S		R		R	S						Referral				S	R	S	S	S		S			S	S	S		R
091506	2009	CANINE	MIXED BREED DOG	FEMALE SPAYED	urine	18	35	31		S	R	S	S		S			S	S	S		R		S	S					Neg	Referral				S	R	S	S	S		S			S	S	S		R
094391	2009	CANINE	MIXED BREED DOG	FEMALE SPAYED	urine	25	34	30		S	S	S	S		S			S	S	S		S		R	S						Referral				S	S	S	S	S		S			S	S	S		S
074249	2007	CANINE			skin	23	35	30		S	R	S	S		S			S	S	S		R		S	S						Referral				S	R	S	S	S		S			S	S	S		R
074293	2007	CANINE	GREAT DANE	MALE CASTRATED	skin	20	27	23		S	R	S	S		S			S	S	S		R		S	S						Clinical				S	R	S	S	S		S			S	S	S		R
062926	2006	CANINE	MIXED BREED DOG	FEMALE SPAYED	vaginal	22	34	30		S	R	S	S		S			S	S	S		R		R	S				38.72		Referral	No	No		S	R	S	S	S		S			S	S	S		R
072005	2007	CANINE			ear	26	36	28		S	S	S	S		S			S	S	S		S		S	S						Referral				S	S	S	S	S		S			S	S	S		S
060541	2006	CANINE	GREAT DANE	MALE CASTRATED	joint	24	34	28		S	S	S	S		S			S	S	S		S		S	S		0.125		35.77		Clinical	No	No		S	S	S	S	S		S			S	S	S		S
070940	2007	CANINE			urine	27	36	32		S	S	S	S		S			S	S	S		S		S	S						Referral				S	S	S	S	S		S			S	S	S		S
80892	2008	CANINE			ear	6	24	6		S	R	S	S		S			S	R	R		R		S	S					mec+, no band	Referral				S	R	R	S	S		S			S	R	R		R
81115	2008	CANINE			ear	6	25	6		S	R	S	S		S			S	R	R		R		S	S					mec+, no band	Referral				S	R	R	S	S		S			S	R	R		R
090032	2009	CANINE	ENGLISH BULLDOG	MALE CASTRATED	skin	11	26			S	R	S	S		R			R	S	R		R		R	R					POS	Clinical				S	R		S	S		R			R	S	R		R
091992	2009	CANINE	ENGLISH BULLDOG	MALE CASTRATED	skin	11	24	13	S	S	R	S	S		R	I		R	I	R	R	R	S	R	R					POS	Clinical			S	S	R	R	S	S		R	R		R	R	R	R	R	S
092017	2009	CANINE	MIXED BREED DOG	MALE CASTRATED	skin	6	21	6	S	S	R	S	S		R	I		R	I	R	R	R	S	R	R					POS	Clinical			S	S	R	R	S	S		R	R		R	R	R	R	R	S
094684	2009	CANINE	MIXED BREED DOG	MALE CASTRATED	skin	20	35	31		S	R	S	S		S			S	S	S		R		S	S						Clinical				S	R	S	S	S		S			S	S	S		R
84570	2008	CANINE			urine	23	34	28		S	R	S	S		S			S	S	S		R		S	S						Referral				S	R	S	S	S		S			S	S	S		R
092688	2009	CANINE	BOXER	MALE CASTRATED	skin	19	31	27		S	R	S	S		S			S	S	S		R		S	S					Neg	Clinical				S	R	S	S	S		S			S	S	S		R
82669	2008	CANINE			skin	9	23	11		S	R	S	S		R			R	I	R		R		R	R					mec+, Type 5	Referral				S	R	R	S	S		R			R	R	R		R
82361	2008	CANINE			skin	22	33	29		S		S	S		S			S	S	S		R		R	S					0, no band	Referral				S		S	S	S		S			S	S	S		R
060303	2006	CANINE	SHIH TZU	FEMALE SPAYED	ear	6	20	6		R	R	R	S		S			S	R	R		R		S	S				25.38	1261 bp/ 0	Referral	No	No		R	R	R	R	S		S			S	R	R		R
061956	2006	CANINE	SHIH TZU	FEMALE SPAYED	skin	6	25	6		R	R	R	S		S			S	S	I		R		S	R				POS	0 bp/ 0	Referral	No	No		R	R	R	R	S		S			S	S	R		R
80982	2008	CANINE	MIXED BREED DOG	MALE	skin	21	32	29		S	R	S	S		S			S	S	S		R		S	S						Referral				S	R	S	S	S		S			S	S	S		R
82935	2008	CANINE	MIXED BREED DOG	MALE	skin	23	35	29		S	R	S	S		S			S	S	S		R		S	S					0,	Referral				S	R	S	S	S		S			S	S	S		R
82009	2008	CANINE			skin	20	33	29		S	R	S	S		S			S	S	S		R		R	S					0, no band	Referral				S	R	S	S	S		S			S	S	S		R
84815	2008	CANINE	MIXED BREED DOG	FEMALE SPAYED	skin	10	24	14	S	S	R	S	S		R	I		R	S	R	I	R	S	R	R						Clinical			S	S	R	R	S	S		R	R		R	S	R	R	R	S
092826	2009	CANINE			skin	9	23	9		S	R	S	S	S	R			R	S			R		S	I					POS	Referral				S	R	R	S	S	S	R			R	S			R
071666	2007	CANINE	LABRADOR RETRIEVER	FEMALE SPAYED	skin	23	34	30		S	R	S	S		S			S	S	S		R		S	S						Clinical				S	R	S	S	S		S			S	S	S		R
094507	2009	CANINE			skin	20	34	30		S	R	S	S		S			S	S	S		R		S	S						Referral				S	R	S	S	S		S			S	S	S		R
83589	2008	CANINE	GREAT PYRENEES	MALE CASTRATED	skin	6	21	8		R	R	R	S		R			R	S	R		R		R	R						Referral				R	R	R	R	S		R			R	S	R		R
093656	2009	CANINE			ear	17	34	30		S	R	S	S	S	S			S	S	S		R	S	S	S	=0.25					Referral				S	R	S	S	S	S	S			S	S	S		R	S
060786	2006	CANINE			bone	23	32	28		S	R	S	S		S			S	S	S		R		S	S				0		Referral	No	No		S	R	S	S	S		S			S	S	S		R
092524	2009	CANINE	ENGLISH BULLDOG	FEMALE	skin	15	29	21	S	S	R	S	S	R	R	I		R	R		R	R	S	R	R					Neg	Clinical			S	S	R	S	S	S	R	R	R		R	R		R	R	S
83350a	2008	CANINE	STAFFORDSHIRE TERRIER	MALE	skin	23	33	30		S	R	S	S		S			S	S	S		R		R	S						Clinical				S	R	S	S	S		S			S	S	S		R
83350c	2008	CANINE	STAFFORDSHIRE TERRIER	MALE	skin	21	33	29		S	R	S	S		S			S	S	S		R		S	S						Clinical				S	R	S	S	S		S			S	S	S		R
075338	2007	CANINE	BEAGLE	FEMALE SPAYED	skin	23	36	31		S	R	S	S		S			S	S	S		R		S	S						Clinical				S	R	S	S	S		S			S	S	S		R
81319	2008	CANINE	MIXED BREED DOG	FEMALE SPAYED	joint	6	21	6		R	R	S	S		R			R	I	R		R		R	R					mec+, Type 5	Clinical				R	R	R	S	S		R			R	R	R		R
82466	2008	CANINE			skin	15	31	21		S		S	S		R			R	S	S		R		S	S					mec+, no band	Referral				S		S	S	S		R			R	S	S		R
065228	2006	CANINE			ear	24	34	32		S	R	S	S		S			S	S	S		R		S	I					0	Referral	No	No		S	R	S	S	S		S			S	S	S		R
090555	2009	CANINE			skin	22	35			S	R	S	S		S			S	S	S		R		S	S						Referral				S	R		S	S		S			S	S	S		R
075393	2007	CANINE		MALE CASTRATED	skin	6	17	6		R	R	R	S		S			S	R	R		R		S	S					mec+, Type 3	Referral				R	R	R	R	S		S			S	R	R		R
073033	2007	CANINE		FEMALE SPAYED	urine	21	33	28		S	R	S	S		S			S	S	S		R		S	S						Referral				S	R	S	S	S		S			S	S	S		R
061528	2006	CANINE	STANDARD POODLE	MALE CASTRATED	ear	15	29	17		S	R	S	S		R			R	S	R		R		R	R		3		24.68	Type 5 (253 bp)	Referral	No	No		S	R	R	S	S		R			R	S	R		R
061818	2006	CANINE			ear	15	28	18		S	R	S	S		R			R	I	R		R		R	R		3		POS	Type 5	Referral	No	No		S	R	R	S	S		R			R	R	R		R
060532	2006	CANINE	STANDARD POODLE	MALE CASTRATED	ear	22	30	30		S	S	S	S		S			S	S	S		S		S	S				0		Referral	No	No		S	S	S	S	S		S			S	S	S		S
83808	2008	CANINE			skin	6	8	6		R	R	R	S		R			R	S	R		R		S	S						Referral				R	R	R	R	S		R			R	S	R		R
062514	2006	CANINE	MIXED BREED DOG		bone	22	30	28		S	S	S	S		S			S	S	S		S		S	S				38.06		Referral	No	No		S	S	S	S	S		S			S	S	S		S
84321	2008	CANINE	SHIH TZU	FEMALE SPAYED	ear	23	34	31		S	S	S	S		S			S	S	S		S		S	S						Clinical				S	S	S	S	S		S			S	S	S		S
070603	2007	CANINE			skin	15	29	18		S	R	S	R		R			R	S	R		R		R	R					mec+, Type 5	Referral				S	R	R	S	R		R			R	S	R		R
092196	2009	CANINE	MINIATURE SCHNAUZER 20-30LBS	FEMALE SPAYED	skin	21	34	29		S	R	S	S		R			R	R	S		R		R	R						Clinical				S	R	S	S	S		R			R	R	S		R
075897a	2007	CANINE	JACK RUSSELL TERRIER	MALE CASTRATED	skin	6	6	6		R	R	R	I		R			R	S	R		R		S	S					mec+, Type 2	Clinical				R	R	R	R	R		R			R	S	R		R
075897b	2007	CANINE	JACK RUSSELL TERRIER	MALE CASTRATED	skin	6	21	6		R	R	S	S		R			R	I	R		R		R	R					mec+, Type 5	Clinical				R	R	R	S	S		R			R	R	R		R
85336	2008	CANINE	JACK RUSSELL TERRIER	MALE CASTRATED	skin	20	34			S	S	S	S		S			S	S	S		S		S	S						Clinical				S	S		S	S		S			S	S	S		S
81656	2008	CANINE	GERMAN SHEPHERD DOG	FEMALE SPAYED	skin	23	32	30		S	S	S	S		S			S	S	S		S		S	S						Clinical				S	S	S	S	S		S			S	S	S		S
81657	2008	CANINE	GERMAN SHEPHERD DOG	FEMALE SPAYED	skin	24	30	29		S	S	S	S		S			S	S	S		S		S	S						Clinical				S	S	S	S	S		S			S	S	S		S
82235	2008	CANINE	GERMAN SHEPHERD DOG	FEMALE SPAYED	skin	6	23	6	S	R		R	R		R			R	I	R		R	S	R	R					mec+, no band	Clinical			S	R		R	R	R		R			R	R	R		R	S
091819	2009	CANINE			skin	6	25	6		R	R	R	S		R			R	R	R		R		S	R					POS	Referral				R	R	R	R	S		R			R	R	R		R
094728	2009	CANINE			skin	6	24	6		R	R	R	S		R			R	R	R		R		S	R					POS	Referral				R	R	R	R	S		R			R	R	R		R
090307	2009	CANINE			skin	21	32			S	R	S	S		R			R	R	S		R		R	R					POS	Referral				S	R		S	S		R			R	R	S		R
072236	2007	CANINE			ear	23	33	30		S	R	S	S		S			S	S	S		R		R	S						Referral				S	R	S	S	S		S			S	S	S		R
075318	2007	CANINE	GOLDEN RETRIEVER	MALE CASTRATED	skin	12	23	13		S	R	S	S		R			R	R	R		R		R	R					mec+, Type 5	Clinical				S	R	R	S	S		R			R	R	R		R
80841	2008	CANINE	GOLDEN RETRIEVER	MALE CASTRATED	skin	24	36	30		S	S	S	S		S			S	S	S		S		S	S						Clinical				S	S	S	S	S		S			S	S	S		S
061955	2006	CANINE			urine	28	38	32		S	R	S	S		S			S	S	S		R		S	I				32.33		Referral	No	No		S	R	S	S	S		S			S	S	S		R
074567	2007	CANINE	GERMAN SHEPHERD DOG	FEMALE SPAYED	skin	6	20	6		R	R	R	S		R			R	I	R		R		R	R					mec+, no band*	Clinical				R	R	R	R	S		R			R	R	R		R
82127	2008	CANINE			ear	22	34	30		S		S	S		S			S	S	S		R		R	S					0, no band	Referral				S		S	S	S		S			S	S	S		R
85293	2008	CANINE			ear	19	33			S	R	S	S		S			S	S	S		R		S	S						Referral				S	R		S	S		S			S	S	S		R
062610	2006	CANINE	GERMAN SHEPHERD DOG	MALE	joint	22	35	32		S	R	S	S		S			S	S	S		R		S	S				37.4		Clinical	No	No		S	R	S	S	S		S			S	S	S		R
070323	2007	CANINE			joint	27	35	31		S	S	S	S		S			S	S	S		S		S	S					Neg	Referral				S	S	S	S	S		S			S	S	S		S
070209	2007	CANINE			ear	25	35	30		S	S	S	S		S			S	S	S		S		S	S						Referral				S	S	S	S	S		S			S	S	S		S
092235	2009	CANINE	SHIH TZU	MALE CASTRATED	skin	18	33	29		S	R	S	S		S			S	S	S		R		S	I						Clinical				S	R	S	S	S		S			S	S	S		R
82487	2008	CANINE	BICHON FRISE	MALE CASTRATED	skin	21	35	31		S		S	S		S			S	S	S		R		R	R					0, no band	Clinical				S		S	S	S		S			S	S	S		R
80324	2008	CANINE	CAVALIER KING CHARLES SPANIEL	FEMALE SPAYED	skin	6	18	6		R	R	R	S		R			R	S	R		R		R	R					mec+, Type 5	Clinical				R	R	R	R	S		R			R	S	R		R
072035	2007	CANINE	ROTTWEILER	MALE	peritoneal	20	26	19		S	S	S	S		S			S	S	S		S		S	S						Clinical				S	S	R	S	S		S			S	S	S		S
80560	2008	CANINE	MIXED BREED DOG	MALE CASTRATED	ear	22	34	30		S	R	S	S		S			S	S	S		R		S	S						Referral				S	R	S	S	S		S			S	S	S		R
80589	2008	CANINE	GOLDEN RETRIEVER	MALE CASTRATED	skin	24	33	30		S	S	S	S		S			S	S	S		S		S	S						Clinical				S	S	S	S	S		S			S	S	S		S
80325	2008	CANINE			ear	6	21	6		R	R	S	S		S		R	S	R	R		R		S	S					mec+, Type 3	Referral				R	R	R	S	S		S		R	S	R	R		R
81648	2008	CANINE			skin	10	24	13		S	R	S	S		R			R	I	R		R		R	R					mec+,	Referral				S	R	R	S	S		R			R	R	R		R
83425	2008	CANINE			skin	10	24	13		S	R	S	S		R			R	S	R		R		R	R						Referral				S	R	R	S	S		R			R	S	R		R
84620	2008	CANINE			skin	24	34	32		S	R	S	S		R			R	R	S		R		R	R						Referral				S	R	S	S	S		R			R	R	S		R
075064	2007	CANINE			ear	24	32	28		S	S	S	S		S			S	S	S		S		S	S						Referral				S	S	S	S	S		S			S	S	S		S
85374	2008	CANINE			skin	8	23			S	R	S	S		R			R	S	R		R		R	R						Referral				S	R		S	S		R			R	S	R		R
091626	2009	CANINE	MIXED BREED DOG	MALE CASTRATED	skin	6	8	6		R	R	R	S		R			R	S	R		R		S	S						Clinical				R	R	R	R	S		R			R	S	R		R
091626	2009	CANINE	MIXED BREED DOG	MALE CASTRATED	skin	21	32	29		S	S	S	S		S			S	S	S		S		S	S						Clinical				S	S	S	S	S		S			S	S	S		S
094346	2009	CANINE			skin	22	31	28		S	S	S	S		S			S	S	S		S		S	S						Referral				S	S	S	S	S		S			S	S	S		S
076096	2007	CANINE	STANDARD SCHNAUZER 30-40LBS	MALE CASTRATED	nasal	16	28	20		S	R	S	S		R		S	R	S			R		S	S						Clinical				S	R	R	S	S		R		S	R	S			R
076096	2007	CANINE	STANDARD SCHNAUZER 30-40LBS	MALE CASTRATED	nasal	23	34	29		S	S	S	S		S		S	S	S			S		S	S						Clinical				S	S	S	S	S		S		S	S	S			S
092248	2009	CANINE	GERMAN SHEPHERD DOG	FEMALE SPAYED	skin	6	21	6	S	S	R	S	S		R	I		R	I	R	R	R	S	R	R					POS	Clinical			S	S	R	R	S	S		R	R		R	R	R	R	R	S
072711	2007	CANINE	SHAR-PEI	FEMALE	ear	23	34	31		S	R	S	S		R			R	S	R		R		R	R						Clinical				S	R	S	S	S		R			R	S	R		R
091091	2009	CANINE	ENGLISH SPRINGER SPANIEL	MALE CASTRATED	skin	20	32	29		S	R	S	S		S			S	S	S		R		S	S						Clinical				S	R	S	S	S		S			S	S	S		R
092920	2009	CANINE	ENGLISH SETTER	FEMALE	bone	6	20	6	S	R	R	S	S		R	I		R	I	R	I	R	S	R	R					POS	Clinical			S	R	R	R	S	S		R	R		R	R	R	R	R	S
092921	2009	CANINE	ENGLISH SETTER	FEMALE	bone	6	20	6		S	R	S	S		R			R	I	R		R		R	R					POS	Clinical				S	R	R	S	S		R			R	R	R		R
070784	2007	CANINE			skin	24	34	31		S	R	S	S		S			S	S	S		R		S	S						Referral				S	R	S	S	S		S			S	S	S		R
091662	2009	CANINE			urine	20	33	30		S	R	S	S		S			S	S	S		R		S	S					Neg	Referral				S	R	S	S	S		S			S	S	S		R
091857	2009	CANINE			urine	21	34	30		S	R	S	S		S			S	S	S		R		S	S						Referral				S	R	S	S	S		S			S	S	S		R
094532a	2009	CANINE	MALTESE DOG	FEMALE SPAYED	trach/bronch	18	31	28		S	R	S	S		R			R	S	S		R		S	S						Clinical				S	R	S	S	S		R			R	S	S		R
094532b	2009	CANINE	MALTESE DOG	FEMALE SPAYED	trach/bronch	19	34	31		S	R	S	S		R			R	S	S		R		R	S						Clinical				S	R	S	S	S		R			R	S	S		R
094555	2009	CANINE	MALTESE DOG	FEMALE SPAYED	trach/bronch	18	34	31		S	R	S	S		R			R	S	S		R		R	S						Clinical				S	R	S	S	S		R			R	S	S		R
072503	2007	CANINE	GOLDEN RETRIEVER	MALE CASTRATED	skin	25	36	31		S	S	S	S		R			R	R	R		S		R	R						Clinical				S	S	S	S	S		R			R	R	R		S
072503	2007	CANINE	GOLDEN RETRIEVER	MALE CASTRATED	skin	20	31	27		S	R	S	S		S			S	R	R		R		S	S						Clinical				S	R	S	S	S		S			S	R	R		R
073404	2007	CANINE	GOLDEN RETRIEVER	MALE CASTRATED	skin	6	21	6		S	R	S	S		R			R	I	R		R		R	R					mec+, Type 5	Clinical				S	R	R	S	S		R			R	R	R		R
84009	2008	CANINE	GREAT DANE	MALE	skin	9	25	15		S	R	S	S		R			R	S	R		R		R	R						Referral				S	R	R	S	S		R			R	S	R		R
065722a	2006	CANINE			skin	24	36	33		S	R	S	S		S			S	S	S		R		R	S					0	Referral	No	No		S	R	S	S	S		S			S	S	S		R
065722b	2006	CANINE			skin	20	25	22		S	R	S	S		S			S	S	S		R		S	S				Neg		Referral	No	No		S	R	S	S	S		S			S	S	S		R
064382	2006	CANINE	PUG	FEMALE SPAYED	ear	24	35	32		S	R	S	S		S			S	S	S		R		R	S					0	Referral	No	No		S	R	S	S	S		S			S	S	S		R
072042	2007	CANINE	STAFFORDSHIRE TERRIER	FEMALE	skin	6	25	6		S	R	S	S		S			S	S	S		R		S	S					mec+, no band	Clinical				S	R	R	S	S		S			S	S	S		R
072851	2007	CANINE	STAFFORDSHIRE TERRIER	FEMALE	skin	9	23	12		S	R	S	S		R			R	I	R		R		R	R					mec+, Type 5	Clinical				S	R	R	S	S		R			R	R	R		R
075208	2007	CANINE			nasal	21	26	18		S	S	S	S		R			R	S	R		S		S	S						Referral				S	S	R	S	S		R			R	S	R		S
83971	2008	CANINE			urine	22	33	30		S	S	S	S		S			S	S	S		S		S	I						Referral				S	S	S	S	S		S			S	S	S		S
84089	2008	CANINE			joint	23	34	30		S	S	S	S		S			S	S	S		S		S	S						Referral				S	S	S	S	S		S			S	S	S		S
093230	2009	CANINE	MIXED BREED DOG	MALE CASTRATED	urine	6	6	6		R	R	R	S		R			R	S	R		R		S	S					POS	Clinical				R	R	R	R	S		R			R	S	R		R
81710	2008	CANINE	ENGLISH BULLDOG	MALE	skin	9	27	8		S	R	S	S		S			S	I	I		R		S	S					mec+, no band	Clinical				S	R	R	S	S		S			S	R	R		R
090040	2009	CANINE			ear	23	36			S	S	S	S		S			S	S	S		S		S	S					POS	Referral				S	S		S	S		S			S	S	S		S
072877	2007	CANINE			nasal	12	25	15		S	R	S	S		R			R	S	R		R		R	R						Referral				S	R	R	S	S		R			R	S	R		R
072799	2007	CANINE			urine	26	35	31		S	S	S	S		S			S	S	S		S		R	S						Referral				S	S	S	S	S		S			S	S	S		S
074735	2007	CANINE	LABRADOR RETRIEVER	MALE CASTRATED	skin	20	32	29		S	R	S	S		S			S	S	S		R		S	S						Referral				S	R	S	S	S		S			S	S	S		R
81639	2008	CANINE	LABRADOR RETRIEVER	FEMALE	skin	25	34	28		S	S	S	S		S			S	S	S		S		S	S						Clinical				S	S	S	S	S		S			S	S	S		S
81639	2008	CANINE	LABRADOR RETRIEVER	FEMALE	skin	24	33	30		S	S	S	S		I			S	S	S		S		S	S						Clinical				S	S	S	S	S		R			S	S	S		S
093556	2009	CANINE	CAVALIER KING CHARLES SPANIEL	FEMALE	urine	22	34	28		S	R	S	S		R			R	S	S		R		R	I						Clinical				S	R	S	S	S		R			R	S	S		R
062292a	2006	CANINE	MINIATURE SCHNAUZER 20-30LBS	FEMALE SPAYED	urine	25	34	30		S	R	S	S		S			S	S	S		R		R	S				0		Clinical	No	No		S	R	S	S	S		S			S	S	S		R
074443	2007	CANINE	ROTTWEILER	FEMALE SPAYED	skin	6	22	6		S	R	S	S		R			R	I	R		R		R	R					mec+, Type 5	Clinical				S	R	R	S	S		R			R	R	R		R
85808	2008	CANINE			skin	6	18			R	R	S	S		S			S	R	R		R		S	S						Referral				R	R		S	S		S			S	R	R		R
83504	2008	CANINE	GERMAN SHEPHERD DOG	MALE CASTRATED	joint	21	35	30		S	R	S	S		S			S	S	S		R		S	S						Clinical				S	R	S	S	S		S			S	S	S		R
83505	2008	CANINE	GERMAN SHEPHERD DOG	MALE CASTRATED	joint	21	34	32		S	R	S	S		S			S	S	S		R		S	S						Clinical				S	R	S	S	S		S			S	S	S		R
065015a	2006	CANINE			urine	27	36	32		S	R	S	S		S			S	S	S		R		S	I					0	Referral	No	No		S	R	S	S	S		S			S	S	S		R
065015b	2006	CANINE			urine	28	37	33		S	R	S	S		S			S	S	S		R		S	S						Referral	No	No		S	R	S	S	S		S			S	S	S		R
063283	2006	CANINE	CHIHUAHUA	FEMALE SPAYED	skin	18	25	22		S	R	S	S		S			S	S	S		S		S	S				Neg		Referral	No	No		S	R	S	S	S		S			S	S	S		S
071588	2007	CANINE	GERMAN SHEPHERD DOG	MALE	skin	10	24	14		S	R	S	S		R			R	I	R		R		R	R					mec+, Type 5	Clinical				S	R	R	S	S		R			R	R	R		R
061065	2006	CANINE	POMERANIAN	MALE	skin	6	24	13		S	R	S	S		R			R	I	R		R		R	R		>256		29.65	Type 5 (376 bp)	Clinical	No	No		S	R	R	S	S		R			R	R	R		R
063059	2006	CANINE	POMERANIAN	MALE	skin	10	22	11		S	R	S	S		R			R	I	R		R		R	R				27.32	Type 5 (387 bp)	Clinical	No	No		S	R	R	S	S		R			R	R	R		R
060094	2006	CANINE	PEKINGESE	FEMALE SPAYED	skin	11	23	13		S	R	S	S		R			R	S	R		R		R	R		>256		29.87	Type 5 (339 bp)	Clinical	No	No		S	R	R	S	S		R			R	S	R		R
063151	2006	CANINE	PEKINGESE	FEMALE SPAYED	skin	9	23	11		S	R	S	S		R			R	I	R		R		R	R		128		29.43	Type 5 (305 bp)	Clinical	No	No		S	R	R	S	S		R			R	R	R		R
81143	2008	CANINE			skin	22	35	32		S	R	S	S		R			R	R	S		R		R	R						Referral				S	R	S	S	S		R			R	R	S		R
81220	2008	CANINE	MINIATURE SCHNAUZER 20-30LBS	FEMALE SPAYED	uterine	22	36	32		S	R	S	S		R			R	R	S		R		R	R						Clinical				S	R	S	S	S		R			R	R	S		R
80194	2008	CANINE			ear	25	33	30		S	S	S	S		S			S	S	S		S		S	S						Referral				S	S	S	S	S		S			S	S	S		S
093189	2009	CANINE	SCOTTISH TERRIER	MALE CASTRATED	skin	6	20	6		S	R	S	S		R			R	I	R		R		R	R					Neg;POS repeat	Referral				S	R	R	S	S		R			R	R	R		R
84751	2008	CANINE	CHINESE CRESTED	MALE	skin	19	33	29		S	R	S	S		S			S	S	S		R		S	I						Clinical				S	R	S	S	S		S			S	S	S		R
070817	2007	CANINE	SHAR-PEI	FEMALE SPAYED	skin	19	34	30		S	R	S	S		S			S	S	S		R		S	S						Clinical				S	R	S	S	S		S			S	S	S		R
075459	2007	CANINE	BOSTON TERRIER	FEMALE SPAYED	skin	21	33	29		S	R	S	S		S			S	S	S		R		S	S						Clinical				S	R	S	S	S		S			S	S	S		R
092200	2009	CANINE	STAFFORDSHIRE TERRIER	FEMALE SPAYED	skin	14	26	21		S	R	S	S		R			R	S	S		R		S	S						Clinical				S	R	S	S	S		R			R	S	S		R
092200	2009	CANINE	STAFFORDSHIRE TERRIER	FEMALE SPAYED	skin	23	32	27		S	R	S	S		S			S	S	S		R		S	S						Clinical				S	R	S	S	S		S			S	S	S		R
075539	2007	CANINE	CHIHUAHUA	FEMALE SPAYED	bone	21	34	30		S	R	S	S		S			S	S	S		R		S	S						Clinical				S	R	S	S	S		S			S	S	S		R
85628	2008	CANINE	CANINE UNASSIGNED	FEMALE SPAYED	skin	19	34			S	R	S	S		S			S	S	S		R		S	S						Clinical				S	R		S	S		S			S	S	S		R
85628	2008	CANINE	CANINE UNASSIGNED	FEMALE SPAYED	skin	20	31			S	S	S	S		S			S	S	S		S		S	S						Clinical				S	S		S	S		S			S	S	S		S
094549	2009	CANINE	BULLMASTIFF	MALE CASTRATED	joint	19	35	30		S	R	S	S		S			S	S	S		R		S	S						Clinical				S	R	S	S	S		S			S	S	S		R
071403	2007	CANINE	BEAGLE	FEMALE SPAYED	urine	24	34	30		S	S	S	S		S			S	S	S		S		S	S						Clinical				S	S	S	S	S		S			S	S	S		S
075059	2007	CANINE			ear	25	34	28		S	S	S	S		S			S	S	S		S		S	S						Referral				S	S	S	S	S		S			S	S	S		S
84092	2008	CANINE			skin	11	25	15		S	R	S	S		R			R	S	R		R		R	R						Referral				S	R	R	S	S		R			R	S	R		R
062380	2006	CANINE	DOGO ARGENTINO	FEMALE SPAYED	skin	8	22	11		S	R	S	S		R			R	S	R		R		R	R		>256		24.75	Type 5	Clinical	No	No		S	R	R	S	S		R			R	S	R		R
062381	2006	CANINE	DOGO ARGENTINO	FEMALE SPAYED	skin	25	36	30		S	R	S	S		S			S	S	S		R		R	R				39.67		Clinical	No	No		S	R	S	S	S		S			S	S	S		R
060402	2006	CANINE			ear	6	26	6		S	R	S	S		S			S	S	S		R		S	S				25.66	Type 3	Referral	No	No		S	R	R	S	S		S			S	S	S		R
070887	2007	CANINE	BOXER	MALE	urine	13	25	16		S	R	S	S		R			R	S	R		R		R	R					mec+, Type 5	Clinical				S	R	R	S	S		R			R	S	R		R
072470	2007	CANINE	ENGLISH BULLDOG		skin	6	22	6		R	R	R	S		S			S	R	S		R		S	S						Referral				R	R	R	R	S		S			S	R	S		R
092204	2009	CANINE	DACHSHUND	MALE CASTRATED	skin	22	36	31		S	R	S	S		S			S	S	S		R		R	S						Clinical				S	R	S	S	S		S			S	S	S		R
072299	2007	CANINE	SAINT BERNARD	FEMALE SPAYED	skin	21	32	30		S	R	S	S		S			S	S	S		R		S	S						Clinical				S	R	S	S	S		S			S	S	S		R
80013	2008	CANINE	GREAT PYRENEES	FEMALE SPAYED	skin	8	22	8		S	R	S	S		R			R	I	R		R		R	R					mec+, Type 5	Clinical				S	R	R	S	S		R			R	R	R		R
84087	2008	CANINE			ear	19	32	28		S	R	S	S		S			S	S	S		R		S	S						Referral				S	R	S	S	S		S			S	S	S		R
092376	2009	CANINE	DACHSHUND	FEMALE	skin	20	33	28		S	S	S	S		S			S	S	S		S		S	S						Clinical				S	S	S	S	S		S			S	S	S		S
076368	2007	CANINE	ENGLISH SPRINGER SPANIEL	FEMALE SPAYED	joint	6	15	6		R	R	R	S		S			S	R	I		R		S	S					mec+, Type 3	Referral				R	R	R	R	S		S			S	R	R		R
092753	2009	CANINE			urine	20	33	29		S	S	S	S	S	S			S	S			S		S	S					Neg	Referral				S	S	S	S	S	S	S			S	S			S
81373	2008	CANINE	YORKSHIRE TERRIER	FEMALE	skin	6	18	6	S	R	R	R	S		R	I		R	I	R		R	S	R	R					mec+, Type 5	Clinical			S	R	R	R	R	S		R	R		R	R	R		R	S
82564	2008	CANINE	GERMAN SHEPHERD DOG	MALE CASTRATED	joint	6	18	6		R	R	R	S		R			R	I	R		R		R	R					mec+, Type 5	Clinical				R	R	R	R	S		R			R	R	R		R
84303	2008	CANINE	LABRADOR RETRIEVER	FEMALE SPAYED	skin	19	34	29		S	R	S	S		S			S	S	S		R		S	S						Clinical				S	R	S	S	S		S			S	S	S		R
84792	2008	CANINE	LABRADOR RETRIEVER	FEMALE SPAYED	skin	11	23	14	S	S	R	S	S		R	I		R	S	R	I	R	S	R	R						Clinical			S	S	R	R	S	S		R	R		R	S	R	R	R	S
85185	2008	CANINE	LABRADOR RETRIEVER	FEMALE SPAYED	skin	11	23	14	S	S	R	S	S		R	I		R	S	R	I	R	S	R	R						Clinical			S	S	R	R	S	S		R	R		R	S	R	R	R	S
073922	2007	CANINE	ENGLISH SPRINGER SPANIEL	FEMALE SPAYED	skin	24	30	28		S	S	S	S		S			S	I	R		S		S	S						Clinical				S	S	S	S	S		S			S	R	R		S
074561	2007	CANINE	ENGLISH SPRINGER SPANIEL	FEMALE SPAYED	skin	21	33	30		S	S	S	S		R			R	S	S		S		S	S						Clinical				S	S	S	S	S		R			R	S	S		S
094383	2009	CANINE	SOFT-COATED WHEATEN TERRIER	MALE CASTRATED	skin	14	25	18		S	R	S	S		R			R	S	S		R		R	S					POS	Clinical				S	R	R	S	S		R			R	S	S		R
093738	2009	CANINE			joint	18	32	28		S	S	S	S		S			S	S	S		S		S	S					Neg	Referral				S	S	S	S	S		S			S	S	S		S
073292	2007	CANINE			ear	26	34	30		S	S	S	S		S			S	S	S		S		S	S						Referral				S	S	S	S	S		S			S	S	S		S
80222	2008	CANINE	GERMAN SHEPHERD DOG	FEMALE SPAYED	skin	23	33	28		S	S	S	S		S			S	S	S		S		S	S						Clinical				S	S	S	S	S		S			S	S	S		S
063343	2006	CANINE	SHETLAND SHEEPDOG	MALE CASTRATED	urine	24	34	31		S	R	S	S		S			S	S	S		R		S	S					0	Clinical	No	No		S	R	S	S	S		S			S	S	S		R
064564	2006	CANINE	SHETLAND SHEEPDOG	MALE CASTRATED	urine	25	37	33		S	R	S	S		S			S	S	S		R		S	S				Neg		Clinical	No	No		S	R	S	S	S		S			S	S	S		R
81877	2008	CANINE			joint	22	30	26		S	R	S	S		S			S	I	S		R		S	R					0, no band	Referral				S	R	S	S	S		S			S	R	S		R
81500	2008	CANINE			ear	20	34	30		S	R	S	S		S			S	S	S		R		S	S						Referral				S	R	S	S	S		S			S	S	S		R
074832	2007	CANINE			ear	23	34	32		S	S	S	S		S			S	S	S		S		S	S						Referral				S	S	S	S	S		S			S	S	S		S
060620	2006	CANINE	MALTESE DOG	FEMALE SPAYED	skin	24	36	33		S	R	S	S		I		S	S	S	S		R		R	S				0		Clinical	No	No		S	R	S	S	S		R		S	S	S	S		R
062388	2006	CANINE	MALTESE DOG	FEMALE SPAYED	skin	20	34	30		S	R	S	S		S			S	S	S		R		R	S		0.19		39.41		Clinical	No	No		S	R	S	S	S		S			S	S	S		R
071605	2007	CANINE	BASSET HOUND	MALE	skin	10	24	14		S	R	S	S		R			R	S	R		R		R	R					mec+, Type 5	Clinical				S	R	R	S	S		R			R	S	R		R
072159a	2007	CANINE	BASSET HOUND	MALE	skin	6	6	6		R	R	R	S		R			R	R	R		R		R	R					mec+, Type 5*	Clinical				R	R	R	R	S		R			R	R	R		R
072159b	2007	CANINE	BASSET HOUND	MALE	skin	14	26	15		S	R	S	S		R			R	S	R		R		R	R					mec+, Type 5*	Clinical				S	R	R	S	S		R			R	S	R		R
84326	2008	CANINE	GOLDEN RETRIEVER	MALE CASTRATED	skin	23	35	25		S	S	S	S		S			S	S	S		S		S	S						Clinical				S	S	S	S	S		S			S	S	S		S
80440	2008	CANINE			ear	22	35	31		S	R	S	S		S			S	S	S		R		R	S						Referral				S	R	S	S	S		S			S	S	S		R
090944	2009	CANINE			skin	10	25	15		S	R	S	S		R			R	I	R		R		R	R					POS	Referral				S	R	R	S	S		R			R	R	R		R
84581	2008	CANINE			joint	6	11	6		R	R	S	S		S			R	S	S		R		S	S						Referral				R	R	R	S	S		S			R	S	S		R
092782	2009	CANINE			ear	6	21	6		S	R	S	S	R	R			R	I			R		R	R					POS	Referral				S	R	R	S	S	R	R			R	R			R
093836	2009	CANINE			skin	18	33	29		S	R	S	S		R			R	S	S		R		S	S					Neg	Referral				S	R	S	S	S		R			R	S	S		R
072879	2007	CANINE	GREAT DANE	MALE	nasal	17	24	20		S	R	S	S		S			S	S	S		R		S	S						Clinical				S	R	R	S	S		S			S	S	S		R
074199	2007	CANINE	GREAT DANE	MALE	nasal	18	24	19		S	R	S	S		S			S	S	S		R		S	S						Clinical				S	R	R	S	S		S			S	S	S		R
80378	2008	CANINE	PAPILLON	FEMALE SPAYED	skin	24	34	29		S	R	S	S		S			S	S	S		R		R	S						Clinical				S	R	S	S	S		S			S	S	S		R
072663	2007	CANINE	NEWFOUNDLAND	FEMALE	vaginal	13	27	18		S	R	S	S		R			R	I	R		R		R	R					mec+, Type 5	Referral				S	R	R	S	S		R			R	R	R		R
061509c	2006	CANINE			ear	26	23	28		S	S	S	S		S			S	S	R		S		S	S				0		Referral	No	No		S	S	S	S	S		S			S	S	R		S
061749	2006	CANINE			ear	28	36	30		S	S	S	S		S			S	S	R		S		S	S				37.62		Referral	No	No		S	S	S	S	S		S			S	S	R		S
84458	2008	CANINE			skin	6	18	6		R	R	I	S		S			S	R	S		R		S	S						Referral				R	R	R	R	S		S			S	R	S		R
063892	2006	CANINE	POMERANIAN	MALE CASTRATED	ttw	23	34	30		S	R	S	S		S			S	S	S		R		R	I					0	Clinical	No	No		S	R	S	S	S		S			S	S	S		R
076235	2007	CANINE			ear	25	34	29		S	S	S	S		S			S	S	S		S		S	S						Referral				S	S	S	S	S		S			S	S	S		S
091077	2009	CANINE	MIXED BREED DOG	MALE	skin	18	34	30		S	R	S	S		S			S	S	S		R		S	S						Referral				S	R	S	S	S		S			S	S	S		R
060605	2006	CANINE			nasal	18	29	26		S	R	S	S		S			S	S	S		R		S	S				40.13		Referral	No	No		S	R	S	S	S		S			S	S	S		R
090237	2009	CANINE	DACHSHUND	FEMALE SPAYED	trach/bronch	22	33			S	R	S	S		S			S	S	S		R		S	S					Neg	Clinical				S	R		S	S		S			S	S	S		R
090238	2009	CANINE	DACHSHUND	FEMALE SPAYED	trach/bronch	21	33			S	R	S	S		S			S	S	S		R		S	S						Clinical				S	R		S	S		S			S	S	S		R
063778	2006	CANINE	MALTESE DOG	MALE CASTRATED	skin	23	35	30		S	R	S	S		S			S	S	S		R		R	S					0	Clinical	No	No		S	R	S	S	S		S			S	S	S		R
063815	2006	CANINE			ear	24	37	35		S	R	S	S		S			S	S	S		R		S	R					0	Referral	No	No		S	R	S	S	S		S			S	S	S		R
85641a	2008	CANINE			skin	18	34			S	R	S	S		S			S	S	S		R		S	S						Referral				S	R		S	S		S			S	S	S		R
85641b	2008	CANINE			skin	18	33			S	R	S	R		R			R	R	S		R		R	S						Referral				S	R		S	R		R			R	R	S		R
070447	2007	CANINE			ear	23	34	30		S	R	S	S		S			S	S	S		R		S	S						Referral				S	R	S	S	S		S			S	S	S		R
070448	2007	CANINE			skin	28	>33	31		S	S	S	S		S			S	S	S		S		R	I						Referral				S	S	S	S	S		S			S	S	S		S
091931	2009	CANINE			nasal	14	25	17	S	S	R	S	R		R	I		R	R	R	R	R	S	R	R					POS	Referral			S	S	R	R	S	R		R	R		R	R	R	R	R	S
093590	2009	CANINE	COCKER SPANIEL	MALE CASTRATED	ear	26	35	>30		S	S	S	S		S			S	S	S		S		S	S						Referral				S	S	S	S	S		S			S	S	S		S
074039	2007	CANINE	BOSTON TERRIER	MALE	eye	23	34	29		S	R	S	S	S	S			S	S	S		R		S	S						Clinical				S	R	S	S	S	S	S			S	S	S		R
82183	2008	CANINE	MIXED BREED DOG	FEMALE SPAYED	urine	25	>30	>30		S		S	S		S			S	S	S		R		R	S						Referral				S		S	S	S		S			S	S	S		R
85795	2008	CANINE			ear	11	28			S	S	S	S		S			S	S	S		S		S	S						Referral				S	S		S	S		S			S	S	S		S
85795	2008	CANINE			ear	19	32			S	R	S	S		S			S	S	S		R		R	I						Referral				S	R		S	S		S			S	S	S		R
82183	2008	CANINE	MIXED BREED DOG	FEMALE SPAYED	urine	22	32	29		S		S	S		S			S		S		R		R	S					0, no band	Referral				S		S	S	S		S			S		S		R
85233	2008	CANINE	AFGHAN HOUND	MALE	skin	6	17	6	S	R	R	R	S		R	I		R	S	R	I	R	S	R	R						Clinical			S	R	R	R	R	S		R	R		R	S	R	R	R	S
094467	2009	CANINE	LABRADOR RETRIEVER	MALE	nasal	6	21	8	S	S	R	S	S		R	I		R	I	R	R	R	S	R	R					POS	Clinical			S	S	R	R	S	S		R	R		R	R	R	R	R	S
092183	2009	CANINE	SHETLAND SHEEPDOG	MALE CASTRATED	skin	23	35	32		S	S	S	S		S			S	S	S		S		S	S						Clinical				S	S	S	S	S		S			S	S	S		S
094002	2009	CANINE	SHETLAND SHEEPDOG	MALE CASTRATED	skin	19	33	29		S	S	S	S		S			S	S	S		S		S	S					Neg	Clinical				S	S	S	S	S		S			S	S	S		S
071575	2007	CANINE			urine	22	36	31		S	R	S	S		S			S	S	R		R		S	S						Referral				S	R	S	S	S		S			S	S	R		R
071008	2007	CANINE	BOXER	MALE CASTRATED	bone	6	26	6		S	R	S	S		S		S	S	S	S		R		R	R					mec+, Type 3*	Clinical				S	R	R	S	S		S		S	S	S	S		R
064818	2006	CANINE	PUG	FEMALE SPAYED	skin	6	17	6		S	R	S	S		R			R	R	R		R		R	R		faint>256			Type 5	Clinical	No	No		S	R	R	S	S		R			R	R	R		R
064839	2006	CANINE	PUG	FEMALE SPAYED	skin	14	24.5	15		S	R	S	S		R			R	S	R		R		R	R		128			Type 5	Clinical	No	No		S	R	R	S	S		R			R	S	R		R
060309	2006	CANINE	MIXED BREED DOG	MALE CASTRATED	ear	26	34	30		S	S	S	S		S			S	S	S		S		S	S				40.47		Clinical	No	No		S	S	S	S	S		S			S	S	S		S
84991	2008	CANINE	SHETLAND SHEEPDOG	MALE	joint	21	35	31		S	R	S	S		S			S	S	S		R		R	S						Clinical				S	R	S	S	S		S			S	S	S		R
063896	2006	CANINE	SAINT BERNARD	FEMALE SPAYED	urine	23	36	32		S	R	S	S		S			S	S	S		R		S	S					0	Clinical	No	No		S	R	S	S	S		S			S	S	S		R
062449	2006	CANINE	MIXED BREED DOG	FEMALE	bone	21	34	31		S	R	S	S		S			S	S	S		R		R	I		0.38		38.7		Clinical	No	No		S	R	S	S	S		S			S	S	S		R
063866	2006	CANINE	CAIRN TERRIER	MALE CASTRATED	skin	22	34	30		S	R	S	S		S			S	S	S		R		S	S					0	Clinical	No	No		S	R	S	S	S		S			S	S	S		R
072329	2007	CANINE			urine	24	30	28		S	S	S	S		S			S	S	S		S		S	S						Referral				S	S	S	S	S		S			S	S	S		S
81898	2008	CANINE			skin	6	20	6		R	R	S	S		R			R	I	R		R		R	R					mec+, Type 5	Referral				R	R	R	S	S		R			R	R	R		R
83666	2008	CANINE	DACHSHUND	MALE CASTRATED	skin	27	34	30		S	S	S	S		S			S	S	S		S		S	S						Clinical				S	S	S	S	S		S			S	S	S		S
094517	2009	CANINE			skin	11	25	13		S	R	S	S		R			R	S	R		R		R	R					POS	Referral				S	R	R	S	S		R			R	S	R		R
094005	2009	CANINE			skin	10	25	15		S	R	S	S		R			R	I	R		R		R	R					POS	Referral				S	R	R	S	S		R			R	R	R		R
84082	2008	CANINE	WEIMARANER	MALE CASTRATED	peritoneal	11	24	15		S	R	S	S		R			R	R	R		R		R							Clinical				S	R	R	S	S		R			R	R	R		R
090845	2009	CANINE			ear	20	34			S	R	S	S		S			S	S	S		R		R	S						Referral				S	R		S	S		S			S	S	S		R
092294	2009	CANINE	LABRADOR RETRIEVER	MALE	skin	19	30	27		S	R	S	S		R			R	R	S		R		R	R						Clinical				S	R	S	S	S		R			R	R	S		R
092295	2009	CANINE	LABRADOR RETRIEVER	MALE	skin	23	34	28		S	S	S	S		S			S	S	S		S		S	S						Clinical				S	S	S	S	S		S			S	S	S		S
064495	2006	CANINE			ear	26	36	31		S	S	S	S		S			S	S	S		S		S	S					0	Referral	No	No		S	S	S	S	S		S			S	S	S		S
85652	2008	CANINE	PLOTT HOUND	MALE	urine	19	31			S	R	S	S		S			S	S	S		R		S	S						Clinical				S	R		S	S		S			S	S	S		R
84339	2008	CANINE			joint	16	27	25		S	R	S	S		R			R	S	S		R		S	S						Referral				S	R	S	S	S		R			R	S	S		R
090039	2009	CANINE			joint	17	27			S	R	S	S		R			R	S	S		R		S	S						Referral				S	R		S	S		R			R	S	S		R
83637	2008	CANINE			skin	22	33	30		S	R	S	S	S	R			R	R			R		R	R						Referral				S	R	S	S	S	S	R			R	R			R
83741	2008	CANINE	STAFFORDSHIRE TERRIER	MALE	skin	13	25	16		S	R	S	S		S			S	S	R		R		R	I						Clinical				S	R	R	S	S		S			S	S	R		R
075228	2007	CANINE			ear	25	33	27		S	S	S	S		S			S	S	S		S		S	S						Referral				S	S	S	S	S		S			S	S	S		S
81287	2008	CANINE			urine	28	33	26		S	S	S	S		S			S	S	S		S		S	I						Referral				S	S	S	S	S		S			S	S	S		S
093608	2009	CANINE	BASSET HOUND	MALE	skin	20	33	29		S	R	S	S		R			R	R	S		R		R	S						Referral				S	R	S	S	S		R			R	R	S		R
093608	2009	CANINE	BASSET HOUND	MALE	ear	11	27	13		S	R	S	S		R			R	R	R		R		S	S					POS	Referral				S	R	R	S	S		R			R	R	R		R
090890	2009	CANINE	GERMAN SHEPHERD DOG	FEMALE SPAYED	skin	18	32	25		S	R	S	S		R			R	S	R		R		R	R						Clinical				S	R	S	S	S		R			R	S	R		R
82415	2008	CANINE			skin	19	33	29		S		S	S		S			S	S	S		R		S	S					0, no band	Referral				S		S	S	S		S			S	S	S		R
093723	2009	CANINE	SHAR-PEI	FEMALE SPAYED	skin	17	34	28		S	R	S	S	S	R			R	S	S		R	S	R	S	=0.25				Neg	Referral				S	R	S	S	S	S	R			R	S	S		R	S
074848	2007	CANINE	RHODESIAN RIDGEBACK	MALE CASTRATED	ear	6	16	6		R	R	R	S		S			S	R	S		R		S	S					mec+, no band	Clinical				R	R	R	R	S		S			S	R	S		R
076363	2007	CANINE	RHODESIAN RIDGEBACK	MALE CASTRATED	skin	6	21	6		R	R	S	S		S			S	S	S		R		S	S					mec+, no band	Clinical				R	R	R	S	S		S			S	S	S		R
85093	2008	CANINE			skin	6	23	12	S	S	R	S	S		R	S		R	S	R	I	R	S	R	R						Referral			S	S	R	R	S	S		R	S		R	S	R	R	R	S
072739	2007	CANINE	SCOTTISH TERRIER	MALE CASTRATED	skin	6	8	6		R	R	R	S		R		R	R	S	R		R		S	S					mec+, Type 2	Clinical				R	R	R	R	S		R		R	R	S	R		R
81590	2008	CANINE			ear	26	33	28		S	S	S	S		S			S	S	S		S		S	S						Referral				S	S	S	S	S		S			S	S	S		S
064278	2006	CANINE	MIXED BREED DOG	FEMALE SPAYED	skin	30	38	33		S	S	S	S		S			S	S	R		S		S	S				Neg		Clinical	No	No		S	S	S	S	S		S			S	S	R		S
064279	2006	CANINE	MIXED BREED DOG	FEMALE SPAYED	skin	28	37	>30		S	S	S	S		S			S	S	R		S		S	S				Neg		Clinical	No	No		S	S	S	S	S		S			S	S	R		S
070471	2007	CANINE			ear	25	26	21		S	S	S	S		R			R	S	R		S		S	S						Referral				S	S	S	S	S		R			R	S	R		S
072610	2007	CANINE			skin	22	35	30		S	R	S	S		S			S	S	S		R		S	S						Referral				S	R	S	S	S		S			S	S	S		R
061676	2006	CANINE	GERMAN SHEPHERD DOG	MALE CASTRATED	joint	6	23	6		S	R	S	S		R			R	S	R		R		R	R		>256		30.56	Type 5 (237 bp)	Clinical	No	No		S	R	R	S	S		R			R	S	R		R
062861	2006	CANINE	GREYHOUND	MALE CASTRATED	skin	10	26	14		S	R	S	S		R			R	S	R		R		R	R		>256		26.99	Type 5 (321 bp)	Clinical	No	No		S	R	R	S	S		R			R	S	R		R
063116	2006	CANINE	GREYHOUND	MALE CASTRATED	skin	6	23	9		S	R	S	S		R			R	S	R		R		R	R				28.94	Type 5 (374 bp)	Clinical	No	No		S	R	R	S	S		R			R	S	R		R
063846	2006	CANINE	YORKSHIRE TERRIER	MALE CASTRATED	urine	25	35	31		S	R	S	S		S			S	S	S		R		R	S					0	Clinical	No	No		S	R	S	S	S		S			S	S	S		R
81136	2008	CANINE	COCKER SPANIEL	MALE	skin	22	35	32		S	R	S	S		S			S	S	S		R		R	S						Referral				S	R	S	S	S		S			S	S	S		R
090521	2009	CANINE			skin	9	25			S	R	S	S		S			S	S	S		R		S	S					POS	Referral				S	R		S	S		S			S	S	S		R
062305	2006	CANINE	LABRADOR RETRIEVER	MALE CASTRATED	peritoneal	22	33	29		S	R	S	S		S			S	S	S		R		R	I				38.69		Clinical	No	No		S	R	S	S	S		S			S	S	S		R
063359	2006	CANINE	DALMATIAN	MALE	skin	6	22	6		S	R	S	S		R			R	I	S		R		R	R		64			Type 5	Clinical	No	No		S	R	R	S	S		R			R	R	S		R
063456	2006	CANINE	DALMATIAN	MALE	skin	18	26	23		S	R	S	S		R			R	S	S		R		S	S				Neg	Type 4c	Clinical	No	No		S	R	S	S	S		R			R	S	S		R
064684	2006	CANINE	DALMATIAN	MALE	skin	6	22	6		S	R	S	S		R			R	I	R		R		R	R		>256			Type 5	Clinical	No	No		S	R	R	S	S		R			R	R	R		R
091498	2009	CANINE			skin	19	27	24		S	R	S	S		S			S	S	S		R		R	S						Referral				S	R	S	S	S		S			S	S	S		R
063843	2006	CANINE	MIXED BREED DOG	FEMALE SPAYED	ear	25	35	32		S	S	S	S		S			S	S	S		S		S	S				Neg		Clinical	No	No		S	S	S	S	S		S			S	S	S		S
064364a	2006	CANINE	MIXED BREED DOG	FEMALE SPAYED	skin	16	26	17		S	R	S	S		R			R	I	R		R		R	R		3		POS	Type 5	Clinical	No	No		S	R	R	S	S		R			R	R	R		R
064364b	2006	CANINE	MIXED BREED DOG	FEMALE SPAYED	skin	14	31	18		S	R	S	S		S			S	S	S		R		S	S				POS	Type 5	Clinical	No	No		S	R	R	S	S		S			S	S	S		R
84367	2008	CANINE			urine	6	21	6		S	R	S	S		R			R	I	R		R		R	R						Referral				S	R	R	S	S		R			R	R	R		R
84600	2008	CANINE	MINIATURE SCHNAUZER 20-30LBS	FEMALE SPAYED	urine	21	34	28		S	R	S	S		I			S	S	S		R		S	S						Referral				S	R	S	S	S		R			S	S	S		R
090688	2009	CANINE	GERMAN SHEPHERD DOG	FEMALE	skin	23	35			S	S	S	S		S			S	S	S		S		S	S						Clinical				S	S		S	S		S			S	S	S		S
091183	2009	CANINE	GERMAN SHEPHERD DOG	FEMALE	skin	13	25	19		S	R	S	S		S			S	S	S		R		S	S					POS	Clinical				S	R	R	S	S		S			S	S	S		R
073771	2007	CANINE	GERMAN SHEPHERD DOG	FEMALE SPAYED	blood	25	35	30		S	R	S	S		S			S	S	S		R		S	S						Clinical				S	R	S	S	S		S			S	S	S		R
073772	2007	CANINE	GERMAN SHEPHERD DOG	FEMALE SPAYED	blood	23	34	31		S	R	S	S		S			S	S	S		R		S	S						Clinical				S	R	S	S	S		S			S	S	S		R
073780	2007	CANINE	GERMAN SHEPHERD DOG	FEMALE SPAYED	urine	23	34	30		S	R	S	S		S			S	S	S		R		S	S						Clinical				S	R	S	S	S		S			S	S	S		R
091859	2009	CANINE	FRENCH BULLDOG	FEMALE SPAYED	urine	24	34	28		S	R	S	S		S			S	S	S		R		S	S						Referral				S	R	S	S	S		S			S	S	S		R
092363	2009	CANINE	FRENCH BULLDOG	FEMALE SPAYED	urine	21	30	26		S	R	S	S		S			S	S	S		R		S	S						Referral				S	R	S	S	S		S			S	S	S		R
093040	2009	CANINE	FRENCH BULLDOG	FEMALE SPAYED	urine	17 (19)	35	30		S	R	S	S		S			S	S	S		R		S	S					Neg	Referral				S	R	S	S	S		S			S	S	S		R
84120	2008	CANINE			urine	22	36	32		S	R	S	S		S			S	S	S		R		S	S						Referral				S	R	S	S	S		S			S	S	S		R
092643	2009	CANINE			urine	21	32	32		S	R	S	S		S			S	S	S		R		S	S					Neg	Referral				S	R	S	S	S		S			S	S	S		R
092829	2009	CANINE	MIXED BREED DOG	FEMALE SPAYED	ear	17	34	31		S	R	S	S	S	S			S	S			R		S	S					Neg	Referral				S	R	S	S	S	S	S			S	S			R
062673	2006	CANINE			ear	27	35	32		S	S	S	S		S			S	S	S		S		S	S				38.43		Referral	No	No		S	S	S	S	S		S			S	S	S		S
064899	2006	CANINE			skin	6	25	8		S	R	S	S		R			R	S	R		R		R	R		>256			Type 5	Referral	No	No		S	R	R	S	S		R			R	S	R		R
81163	2008	CANINE			ear	21	33	29		S	R	S	S		S			S	S	S		R		S	S						Referral				S	R	S	S	S		S			S	S	S		R
091969	2009	CANINE			urine	21	32	28		S	R	S	S		S			S	S	S		R		S	I						Referral				S	R	S	S	S		S			S	S	S		R
092692	2009	CANINE			urine	18	33	28		S	R	S	R		R			R	S	S		R		R	S					Neg	Referral				S	R	S	S	R		R			R	S	S		R
092046	2009	CANINE	MINIATURE SCHNAUZER 20-30LBS	FEMALE	urine	20	37	33		S	R	S	S		S			S	S	S		R		S	S						Referral				S	R	S	S	S		S			S	S	S		R
074781	2007	CANINE	AUSTRALIAN SHEPHERD	FEMALE SPAYED	urine	21	32	28		S	S	S	S		S			S	S	S		S		S	S						Clinical				S	S	S	S	S		S			S	S	S		S
062618	2006	CANINE			ear	24	36	30		S	R	S	S		S			S	S	S		R		S	S				38.49		Referral	No	No		S	R	S	S	S		S			S	S	S		R
073329	2007	CANINE			ear	21	34	30		S	R	S	S		S			S	S	S		R		S	S						Referral				S	R	S	S	S		S			S	S	S		R
85077	2008	CANINE			urine	24	36	34		S	R	S	S		S			S	S	S		R		S	S						Referral				S	R	S	S	S		S			S	S	S		R
85325	2008	CANINE			vaginal	19	34			S	R	S	S		S			S	S	S		R		S	S						Referral				S	R		S	S		S			S	S	S		R
061738	2006	CANINE			bone	28	36	32		S	S	S	S		S			S	S	S		S		S	I				36.83		Referral	No	No		S	S	S	S	S		S			S	S	S		S
80276	2008	CANINE	MIXED BREED DOG	FEMALE SPAYED	eye	23	32	31		S	R	S	S	S	S			S	S	S		R		S	S						Referral				S	R	S	S	S	S	S			S	S	S		R
81671	2008	CANINE			skin	19	32	30		S	R	S	S		S			S	S	S		R		S	S						Referral				S	R	S	S	S		S			S	S	S		R
064608	2006	CANINE			ear	23	35	31		S	S	S	S		S			S	S	S		S		S	S					0	Referral	No	No		S	S	S	S	S		S			S	S	S		S
091952	2009	CANINE	MIXED BREED DOG	FEMALE SPAYED	joint	11	23	14	S	S	R	S	S		R	I		R	I	R	R	R	S	R	R					POS	Clinical			S	S	R	R	S	S		R	R		R	R	R	R	R	S
092031	2009	CANINE	MIXED BREED DOG	FEMALE SPAYED	joint	10	24	14	S	S	R	S	S		R	I		R	I	R	R	R	S	R	R					POS	Clinical			S	S	R	R	S	S		R	R		R	R	R	R	R	S
092181	2009	CANINE	MIXED BREED DOG	FEMALE SPAYED	joint	9	23	12	S	S	R	S	S		R	I		R	I	R	R	R	S	R	R						Clinical			S	S	R	R	S	S		R	R		R	R	R	R	R	S
092296	2009	CANINE	MIXED BREED DOG	FEMALE SPAYED	joint	11	25	16	S	S	R	S	S	S	S	S		S	S	S	S	R	S	S	S	0.5				Neg	Clinical			S	S	R	R	S	S	S	S	S		S	S	S	S	R	S
092296b	2009	CANINE	MIXED BREED DOG	FEMALE SPAYED	joint	10	25	14	S	S	R	S	S		R	I		R	I	R	I	R	S	R	R					POS	Clinical			S	S	R	R	S	S		R	R		R	R	R	R	R	S
092374	2009	CANINE	MIXED BREED DOG	FEMALE SPAYED	joint	10	25	13	S	S	R	S	S		R	I		R	I	R	R	R	S	R	R					POS	Clinical			S	S	R	R	S	S		R	R		R	R	R	R	R	S
070253	2007	CANINE	DOBERMAN PINSCHER	MALE CASTRATED	skin	27	35	31		S	S	S	S		S			S	S	S		S		S	S						Clinical				S	S	S	S	S		S			S	S	S		S
070856	2007	CANINE	DOBERMAN PINSCHER	MALE CASTRATED	ear	22	34	30		S	R	S	S		S			S	R	S		R		R	S						Clinical				S	R	S	S	S		S			S	R	S		R
092184	2009	CANINE	MIXED BREED DOG	MALE CASTRATED	skin	9	27	11		S	R	S	S		S			S	I	R		R		S	S					POS	Clinical				S	R	R	S	S		S			S	R	R		R
090705	2009	CANINE	MIXED BREED DOG	FEMALE SPAYED	skin	23	34			S	R	S	S		S			S	S	S		R		R	S						Referral				S	R		S	S		S			S	S	S		R
073286	2007	CANINE			ear	21	33	29		S	R	S	S		S		S	S	S	S		R		S	S						Referral				S	R	S	S	S		S		S	S	S	S		R
092297	2009	CANINE	COCKER SPANIEL	FEMALE SPAYED	skin	19	30	28		S	R	S	S		S			S	S	S		R		S	S						Clinical				S	R	S	S	S		S			S	S	S		R
062018	2006	CANINE			ear	25	35	33		S	R	S	S		S			S	S	S		R		S	S				37.7		Referral	No	No		S	R	S	S	S		S			S	S	S		R
090007	2009	CANINE			ear	19	32			S	R	S	S		R			R	S	S		R		R	S					Neg	Referral				S	R		S	S		R			R	S	S		R
070684	2007	CANINE	MINIATURE PINSCHER	MALE CASTRATED	nasal	24	35	31		S	R	S	S		S			S	S	S		R		S	S						Referral				S	R	S	S	S		S			S	S	S		R
065626a	2006	CANINE	ENGLISH BULLDOG	MALE	ear	23	35	32		S	R	S	S		R			R	R	S		R		S	S		0.25			0	Referral	No	No		S	R	S	S	S		R			R	R	S		R
065626b	2006	CANINE	ENGLISH BULLDOG	MALE	ear	29	37	33		S	S	S	S		S			S	S	S		S		S	S				Neg		Referral	No	No		S	S	S	S	S		S			S	S	S		S
075836	2007	CANINE			ear	24	34	29		S	R	S	S		S			S	S	S		R		S	S						Referral				S	R	S	S	S		S			S	S	S		R
076455	2007	CANINE			ear	24	33	31		S	S	S	S		S			S	S	S		S		S	S						Referral				S	S	S	S	S		S			S	S	S		S
064740	2006	CANINE	MIXED BREED DOG	FEMALE SPAYED	urine	20	34	30		S	R	S	S		S			S	S	S		R		S	S		0.25			0	Clinical	No	No		S	R	S	S	S		S			S	S	S		R
090571	2009	CANINE			ear	19	33			S	R	S	S		S			S	I	S		R		S	S						Referral				S	R		S	S		S			S	R	S		R
84341	2008	CANINE			skin	10	25	16		S	R	S	S		R			R	S	R		R		R	R						Referral				S	R	R	S	S		R			R	S	R		R
061232	2006	CANINE			bone	24	25	21		S	S	S	S		S			S	S	S		R		S	S				0		Referral	No	No		S	S	S	S	S		S			S	S	S		R
090511	2009	CANINE	YORKSHIRE TERRIER	FEMALE	urine	24	30			S	S	S	S		S			S	S	S		S		S	S						Clinical				S	S		S	S		S			S	S	S		S
065588	2006	CANINE	MASTIFF	MALE	bone	12	22	14		S	R	S	S		R			R	I	R		R		R	R		96			Type 5	Clinical	No	No		S	R	R	S	S		R			R	R	R		R
094754a	2009	CANINE			ear	20	33	26		S	R	S	S		S			S	S	S		R		S	S						Referral				S	R	S	S	S		S			S	S	S		R
094754c	2009	CANINE			ear	6	21	6		S	R	S	S		R			R	I	R		R		R	R					POS	Referral				S	R	R	S	S		R			R	R	R		R
070033	2007	CANINE			ear	26	36	33		S	R	S	S		S			S	S	S		R		S	S					Neg	Referral				S	R	S	S	S		S			S	S	S		R
072087	2007	CANINE	SCOTTISH TERRIER	MALE CASTRATED	nasal	30	36	32		S	S	S	S		S			S	S	S		S		S	S						Clinical				S	S	S	S	S		S			S	S	S		S
074445	2007	CANINE	SOFT-COATED WHEATEN TERRIER	FEMALE SPAYED	urine	6	24	12		S	R	S	S		R			R	S	R		R		R	R					mec+, Type 5	Clinical				S	R	R	S	S		R			R	S	R		R
074829	2007	CANINE	SOFT-COATED WHEATEN TERRIER	FEMALE SPAYED	urine	6	22	11		S	R	S	S		R			R	I	R		R		R	R					mec+, Type 5	Clinical				S	R	R	S	S		R			R	R	R		R
075268	2007	CANINE	SOFT-COATED WHEATEN TERRIER	FEMALE SPAYED	urine	8	22	11		S	R	S	S		R			R	S	R		R		R	R					mec+, Type 5	Clinical				S	R	R	S	S		R			R	S	R		R
075292b	2007	CANINE	SOFT-COATED WHEATEN TERRIER	FEMALE SPAYED	skin	6	22	11		S	R	S	S		R			R	S	R		R		R	R					mec+, Type 5	Clinical				S	R	R	S	S		R			R	S	R		R
075292c	2007	CANINE	SOFT-COATED WHEATEN TERRIER	FEMALE SPAYED	skin	19	33	28		S	R	S	S		R			R	S	R		R		R	R						Clinical				S	R	S	S	S		R			R	S	R		R
075605	2007	CANINE	SOFT-COATED WHEATEN TERRIER	FEMALE SPAYED	urine	6	21	8		S	R	S	S	R	R		R	R	S	R		R		R	R						Clinical				S	R	R	S	S	R	R		R	R	S	R		R
093083	2009	CANINE	ESKIMO	FEMALE SPAYED	skin	13 (17)	26	18		S	R	S	S		S			S	S	S		R		S	S					Neg	Clinical				S	R	R	S	S		S			S	S	S		R
061864	2006	CANINE			urine	32	39	37		S	S	S	S		S			S	S	S		S		S	S				36.17		Referral	No	No		S	S	S	S	S		S			S	S	S		S
093996	2009	CANINE	LABRADOR RETRIEVER	FEMALE SPAYED	skin	20	32	29		S	R	S	S		S			S	S	S		R		S	I					Neg	Clinical				S	R	S	S	S		S			S	S	S		R
065026	2006	CANINE			ear	24	33	30		S	R	S	S		S			S	S	S		R		S	S					0	Referral	No	No		S	R	S	S	S		S			S	S	S		R
071014	2007	CANINE			ear	6	24	6		R	R	R	S		S			S	I	I		R		S	S					0, no band*	Referral				R	R	R	R	S		S			S	R	R		R
070936a	2007	CANINE			skin	14	25	17		S	R	S	S		R		R	R	S	R		R		R	R					mec+, Type 5*	Referral				S	R	R	S	S		R		R	R	S	R		R
070936b	2007	CANINE			skin	6	22	11		S	R	S	S		R		R	R	S	R		R		R	R					mec+, Type 5*	Referral				S	R	R	S	S		R		R	R	S	R		R
82159	2008	CANINE	LABRADOR RETRIEVER	FEMALE SPAYED	skin	22	32	29		S		S	S		S			S	S	S		R		S	S					0, no band	Referral				S		S	S	S		S			S	S	S		R
092898	2009	CANINE			skin	18	33	29		S	R	S	S		S			S	S	S		R		S	S						Referral				S	R	S	S	S		S			S	S	S		R
094360	2009	CANINE			skin	11	23	13		S	R	S	S		R			R	R	R		R		R	R					POS	Referral				S	R	R	S	S		R			R	R	R		R
80264	2008	CANINE			ear	21	32	28		S	R	S	S		S			S	S	S		R		S	S						Referral				S	R	S	S	S		S			S	S	S		R
091367	2009	CANINE	MIXED BREED DOG	FEMALE SPAYED	skin	20	34	30		S	R	S	S		S			S	S	S		R		S	S					Neg	Clinical				S	R	S	S	S		S			S	S	S		R
094064	2009	CANINE			skin	18	33	28		S	R	S	S		S			S	S	S		R		S	S					Neg	Referral				S	R	S	S	S		S			S	S	S		R
83995	2008	CANINE			skin	9	25	16		S	R	S	S		R			R	I	R		R		R	R						Referral				S	R	R	S	S		R			R	R	R		R
094003	2009	CANINE	LABRADOR RETRIEVER	MALE CASTRATED	skin	9	24	15	S	S	R	S	S		R	I		R	I	R	R	R	S	R	R					POS	Clinical			S	S	R	R	S	S		R	R		R	R	R	R	R	S
094677	2009	CANINE	LABRADOR RETRIEVER	MALE CASTRATED	skin	19	33	29		S	R	S	S		S			S	S	S		R		S	S						Clinical				S	R	S	S	S		S			S	S	S		R
061170	2006	CANINE	LABRADOR RETRIEVER	MALE	skin	24	35	31		S	R	S	S		S			S	S	S		R		R	R				42.76		Referral	No	No		S	R	S	S	S		S			S	S	S		R
075662	2007	CANINE	BERNESE MOUNTAIN DOG	MALE	skin	12	25	14		S	R	S	S					R	S	R		R		R	R					mec+, Type 5	Clinical				S	R	R	S	S					R	S	R		R
075705	2007	CANINE			skin	24	32	29		S	S	S	S		S			S	S	S		S		S	S						Referral				S	S	S	S	S		S			S	S	S		S
075987	2007	CANINE	BERNESE MOUNTAIN DOG	FEMALE SPAYED	skin	12	24	14		S	R	S	S		R			R	I	R		R		R	R					mec+, Type 5	Clinical				S	R	R	S	S		R			R	R	R		R
80726	2008	CANINE	BERNESE MOUNTAIN DOG	MALE	skin	21	33	28		S	R	S	S		S			S	S	S		R		R	S						Clinical				S	R	S	S	S		S			S	S	S		R
80726	2008	CANINE	BERNESE MOUNTAIN DOG	MALE	skin	21	33	25		S	S	S	S		S			S	S	S		S		S	S						Clinical				S	S	S	S	S		S			S	S	S		S
80729	2008	CANINE	BERNESE MOUNTAIN DOG	MALE CASTRATED	skin	20	33	30		S	R	S	S		S			S	S	S		R		R	S						Clinical				S	R	S	S	S		S			S	S	S		R
80736	2008	CANINE	BERNESE MOUNTAIN DOG	MALE	nasal/axilla	20	28	22		S	S	S	S		S			S	S	S		S		S	S					0, no band	Clinical				S	S	S	S	S		S			S	S	S		S
81294	2008	CANINE	BERNESE MOUNTAIN DOG	MALE	skin	12	25	14	S	S	R	S	S		R	I		R	I	R		R	S	R	R					mec+, Type 5	Clinical			S	S	R	R	S	S		R	R		R	R	R		R	S
092656	2009	CANINE	BERNESE MOUNTAIN DOG	MALE	skin	24	34	30		S	S	S	S		S			S	S	S		S		S	S					Neg	Clinical				S	S	S	S	S		S			S	S	S		S
092028	2009	CANINE	SHIH TZU	MALE CASTRATED	skin	21	34	27		S	R	S	S		S			S	S	S		R		S	S						Referral				S	R	S	S	S		S			S	S	S		R
090283	2009	CANINE	ENGLISH BULLDOG	FEMALE SPAYED	ear	6	24			R	R	S	S		S			S	S	S		R		R	R					POS	Clinical				R	R		S	S		S			S	S	S		R
091387a	2009	CANINE			ear	21	35	31		S	R	S	S		S			S	S	S		R		S	S					Neg	Referral				S	R	S	S	S		S			S	S	S		R
091387b	2009	CANINE			ear	6	22	6		R	R	R	S		S			S	S	S		R		R	R					POS	Referral				R	R	R	R	S		S			S	S	S		R
092318	2009	CANINE	WEST HIGHLAND WHITE TERRIER	MALE CASTRATED	trach/bronch	6	21	6	S	S	R	S	S		R	I		R	I	R	I	R	S	R	R					POS	Clinical			S	S	R	R	S	S		R	R		R	R	R	R	R	S
062551	2006	CANINE			ear	27	37	32		S	S	S	S		S			S	S	S		S		S	S				39.41		Referral	No	No		S	S	S	S	S		S			S	S	S		S
073498	2007	CANINE	YORKSHIRE TERRIER	MALE CASTRATED	skin	22	33	29		S	R	S	S		S			S	S	S		R		S	S						Clinical				S	R	S	S	S		S			S	S	S		R
82372	2008	CANINE			skin	16	23	22		S		S	S		S			S	S	S		R		S	S					0, no band	Referral				S		S	S	S		S			S	S	S		R
072782	2007	CANINE	MIXED BREED DOG	FEMALE SPAYED	skin	6	20	6		R	R	S	S		S			S	I	S		R		S	S					mec+, no band	Referral				R	R	R	S	S		S			S	R	S		R
81611	2008	CANINE			ear	24	30	28		S	S	S	S		S			S	R	S		S		S	S						Referral				S	S	S	S	S		S			S	R	S		S
82496	2008	CANINE			urine	20	34	29		S		S	S		S			S	S	S		R		S	S					0, no band	Referral				S		S	S	S		S			S	S	S		R
82276c	2008	CANINE	MIXED BREED DOG	FEMALE SPAYED	skin	21	33	24		S		S	S		S			S	S	S		R		S	S					0, no band	Referral				S		S	S	S		S			S	S	S		R
064781	2006	CANINE	YORKSHIRE TERRIER	MALE CASTRATED	ttw	6	23	6		S	R	S	S		R			R	I	R		R		R	R		>256			Type 5	Clinical	No	No		S	R	R	S	S		R			R	R	R		R
090341	2009	CANINE			skin	27	>30			S	R	S	R		R			R	R	S		R		R	S					Neg	Referral				S	R		S	R		R			R	R	S		R
80511	2008	CANINE	YORKSHIRE TERRIER	FEMALE SPAYED	skin	11	24	14		S	R	S	S		R			R	I	R		R		R	R					mec+, Type 5	Referral				S	R	R	S	S		R			R	R	R		R
84007a	2008	CANINE	YORKSHIRE TERRIER	FEMALE SPAYED	skin	9	23	15	S	S	R	S	S		R	I		R	I	R	I	R	S	R	R						Clinical			S	S	R	R	S	S		R	R		R	R	R	R	R	S
84007b	2008	CANINE	YORKSHIRE TERRIER	FEMALE SPAYED	skin	18	34	30		S	R	S	S		S			S	S	S		R		S	S						Clinical				S	R	S	S	S		S			S	S	S		R
091332	2009	CANINE			skin	20	35	32		S	S	S	S		S			S	S	S		S		S	S					Neg	Referral				S	S	S	S	S		S			S	S	S		S
80053b	2008	CANINE	CHINESE CRESTED	FEMALE SPAYED	eye	20	33	30		S	R	S	S	S	R			R	S	S		R		R	S						Clinical				S	R	S	S	S	S	R			R	S	S		R
80547	2008	CANINE	COCKER SPANIEL	MALE CASTRATED	skin	13	25	15		S	R	S	S		R			R	I	R		R		R	R					mec+, Type 5	Referral				S	R	R	S	S		R			R	R	R		R
85858	2008	CANINE			ear	19	33			S	R	S	R		R			R	S	S		R		R	R						Referral				S	R		S	R		R			R	S	S		R
061400	2006	CANINE	LABRADOR RETRIEVER	MALE CASTRATED	skin	14	27	17		S	R	S	S		R			R	S	R		R		R	R		2		26.89	Type 5 (285 bp)	Clinical	No	No		S	R	R	S	S		R			R	S	R		R
070455	2007	CANINE			joint	20	24	20		S	R	S	S		S			S	S	S		R		S	S						Referral				S	R	R	S	S		S			S	S	S		R
073221	2007	CANINE			joint	18	24	20		S	R	S	S		S			S	S	S		R		S	S						Referral				S	R	R	S	S		S			S	S	S		R
091290	2009	CANINE			skin	19	33	28		S	R	S	S		R			R	S	I		R		R	R					Neg	Referral				S	R	S	S	S		R			R	S	R		R
073254	2007	CANINE			urine	27	35	30		S	S	S	S		S			S	S	S		S		S	S						Referral				S	S	S	S	S		S			S	S	S		S
062383	2006	CANINE	MIXED BREED DOG	MALE	ear	27	34	30		S	S	S	S		S			S	S	I		S		S	S				38.58		Clinical	No	No		S	S	S	S	S		S			S	S	R		S
065256	2006	CANINE	MIXED BREED DOG	MALE	skin	28	34	32		S	S	S	S		S			S	S	S		S		S	S				Neg		Clinical	No	No		S	S	S	S	S		S			S	S	S		S
065256a	2006	CANINE	MIXED BREED DOG	MALE	skin	6	23	8		S	R	S	S		R			R	I	R		R		R	R		96			Type 5	Clinical	No	No		S	R	R	S	S		R			R	R	R		R
093268	2009	CANINE			skin	18	36	30		S	R	S	S		S			S	S	S		R		S	S						Referral				S	R	S	S	S		S			S	S	S		R
074134	2007	CANINE	SHIH TZU	FEMALE SPAYED	skin	6	21	6		S	R	S	S		S			S	S	R		R		S	S					mec+, Type 3	Clinical				S	R	R	S	S		S			S	S	R		R
090880	2009	CANINE			ear	20	33			S	R	S	S		S			S	S	S		R		S	I						Referral				S	R		S	S		S			S	S	S		R
092612	2009	CANINE			skin	8	27	12		S	R	S	S		R			R	S	S		R		S	S					POS	Referral				S	R	R	S	S		R			R	S	S		R
80110	2008	CANINE	MIXED BREED DOG	MALE CASTRATED	ear	20	34	30		S	R	S	S		S			S	S	S		R		S	S						Clinical				S	R	S	S	S		S			S	S	S		R
073469	2007	CANINE	BOXER	MALE CASTRATED	skin	24	32	30		S	R	S	S		S			S	S	S		R		S	S						Referral				S	R	S	S	S		S			S	S	S		R
80575	2008	CANINE	DACHSHUND	MALE CASTRATED	skin	25	32	29		S	S	S	S		S		S	S	S	S		S		S	S						Clinical				S	S	S	S	S		S		S	S	S	S		S
82251	2008	CANINE	DACHSHUND	MALE CASTRATED	skin	16	24	15	S	S		S	R		R	I		R	I	R		R	S	R	R					mec+, Type 5	Clinical			S	S		R	S	R		R	R		R	R	R		R	S
093004c	2009	CANINE			ear	11	25	14		S	R	S	I		R			R	R	R		R		R	R					POS	Referral				S	R	R	S	R		R			R	R	R		R
093004d	2009	CANINE			ear	12	27	15		S	R	S	S		R			R	R	R		R		R	R					POS	Referral				S	R	R	S	S		R			R	R	R		R
093765	2009	CANINE	MIXED BREED DOG	FEMALE SPAYED	skin	16	34	29		S	R	S	S	S	S			S	S	S		R	S	S	S	=0.25				Neg	Clinical				S	R	S	S	S	S	S			S	S	S		R	S
094556	2009	CANINE	MIXED BREED DOG	FEMALE SPAYED	skin	21	34	30		S	R	S	S		S			S	S	S		R		S	S						Clinical				S	R	S	S	S		S			S	S	S		R
075673	2007	CANINE			nasal	23	33	28		S	S	S	S		S			S	S	S		S		S	S						Referral				S	S	S	S	S		S			S	S	S		S
074819	2007	CANINE	BOSTON TERRIER	FEMALE SPAYED	joint	16	23	21		S	R	S	S		S			S	S	S		R		S	S						Clinical				S	R	S	S	S		S			S	S	S		R
073045	2007	CANINE	BICHON FRISE	MALE CASTRATED	skin	23	34	30		S	R	S	S		S			S	S	S		R		S	S						Clinical				S	R	S	S	S		S			S	S	S		R
073512	2007	CANINE			urine	20	26	25		S	R	S	S		R			R	S	S		R		R	S						Referral				S	R	S	S	S		R			R	S	S		R
81939	2008	CANINE	SHETLAND SHEEPDOG	FEMALE SPAYED	urine	6	19	6		R	R	R	S		R			R	S	R		R		R	R					mec+, Type 5	Clinical				R	R	R	R	S		R			R	S	R		R
090633	2009	CANINE	PUG	FEMALE SPAYED	ear	20	32			S	R	S	S		S			S	I	S		R		S	S						Clinical				S	R		S	S		S			S	R	S		R
091863	2009	CANINE	PUG	FEMALE SPAYED	ear	20	33	26		S	R	S	S		S			S	R	S		S		S	S						Clinical				S	R	S	S	S		S			S	R	S		S
091863	2009	CANINE	PUG	FEMALE SPAYED	ear	20	34	31		S	R	S	S		S			S	R	S		R		S	S						Clinical				S	R	S	S	S		S			S	R	S		R
074200	2007	CANINE	GOLDEN RETRIEVER	MALE CASTRATED	skin	20	32	32		S	R	S	S		S			S	S	S		R		S	S						Clinical				S	R	S	S	S		S			S	S	S		R
81497	2008	CANINE	PEMBROKE WELSH CORGI	FEMALE SPAYED	skin	6	23	6		R	R	I	S		S		S	S	R	S		R		R	S					mec+, Type 3	Clinical				R	R	R	R	S		S		S	S	R	S		R
073364	2007	CANINE			urine	26	30	30		S	S	S	S		S			S	S	S		S		S	S						Referral				S	S	S	S	S		S			S	S	S		S
091289	2009	CANINE			ear	21	33	30		S	S	S	S		S			S	R	S		S		S	S					Neg	Referral				S	S	S	S	S		S			S	R	S		S
062236	2006	CANINE			urine	25	33	28		S	R	S	S		S			S	S	S		R		R	I				37.16		Referral	No	No		S	R	S	S	S		S			S	S	S		R
070550	2007	CANINE	MIXED BREED DOG	MALE CASTRATED	ear	20	35	30		S	R	S	S		S		S	S	S	S		R		R	S						Clinical				S	R	S	S	S		S		S	S	S	S		R
060638	2006	CANINE	SHIH TZU	MALE CASTRATED	skin	24	36	33		S	R	S	S		S			S	S	S		R		S	R		0.25		0		Clinical	No	No		S	R	S	S	S		S			S	S	S		R
073322	2007	CANINE	LHASA APSO	FEMALE SPAYED	skin	22	33	30		S	R	S	S		S			S	S	S		R		R	S						Clinical				S	R	S	S	S		S			S	S	S		R
075984	2007	CANINE	LHASA APSO	FEMALE SPAYED	skin	6	20	6		R	R	S	S		R			R	I	R		R		R	R					mec+, Type 5	Clinical				R	R	R	S	S		R			R	R	R		R
81744	2008	CANINE	SHIH TZU	MALE CASTRATED	skin	19	33	29		S	R	S	R	S	R			R	I	S		R		R	R					0, no band	Clinical				S	R	S	S	R	S	R			R	R	S		R
82436	2008	CANINE	LHASA APSO	FEMALE SPAYED	skin	21	33	29		S		S	S		S			S	S	S		R		S	S						Clinical				S		S	S	S		S			S	S	S		R
82437	2008	CANINE	LHASA APSO	FEMALE SPAYED	eye	19	32	29		S		S	S	S	S			S	S	S		R		R	S					0, no band	Clinical				S		S	S	S	S	S			S	S	S		R
090982a	2009	CANINE	FRENCH BULLDOG	FEMALE SPAYED	skin	18	32	28		S	S	S	S		S			S	S	S		S		S	S						Clinical				S	S	S	S	S		S			S	S	S		S
090982c	2009	CANINE	FRENCH BULLDOG	FEMALE SPAYED	skin	18	32	28		S	R	S	S		S			S	S	S		R		S	S						Clinical				S	R	S	S	S		S			S	S	S		R
074977	2007	CANINE			skin	22	35	32		S	R	S	S		S			S	S	S		R		S	S						Referral				S	R	S	S	S		S			S	S	S		R
060219	2006	CANINE	COCKER SPANIEL	FEMALE SPAYED	ear	24	33	29		S	S	S	S		S			S	S	S		S		S	S				40.16		Referral	No	No		S	S	S	S	S		S			S	S	S		S
064349	2006	CANINE			ear	27	35	>30		S	S	S	S		S			S	S	S		S		S	S				Neg		Referral	No	No		S	S	S	S	S		S			S	S	S		S
075985	2007	CANINE	GREAT PYRENEES	MALE CASTRATED	skin	19	32	28		S	R	S	S		S			S	S	S		R		R	S						Clinical				S	R	S	S	S		S			S	S	S		R
85057	2008	CANINE	ENGLISH BULLDOG	MALE CASTRATED	skin	6	22	14	S	S	R	S	S		R	S		R	I	R	S	R	S	R	R						Clinical			S	S	R	R	S	S		R	S		R	R	R	S	R	S
094492	2009	CANINE	MIXED BREED DOG	FEMALE SPAYED	urine	23	33	28		S	S	S	S		S			S	S	S		S		S	S						Clinical				S	S	S	S	S		S			S	S	S		S
092380	2009	CANINE	BULLMASTIFF	MALE CASTRATED	ear	9	14	13		S	R	S	S		I			S	S	S		R		S	S						Referral				S	R	R	S	S		R			S	S	S		R
060940	2006	CANINE	MIXED BREED DOG	FEMALE SPAYED	nasal	24	37	34		S	R	S	S		S			S	S	S		R		S	I				40.54		Referral	No	No		S	R	S	S	S		S			S	S	S		R
091763	2009	CANINE			ear	6	18	6		R	R	R	S		S			S	I	S		R		S	S					POS	Referral				R	R	R	R	S		S			S	R	S		R
060307	2006	CANINE			ear	24	33	29		S	S	S	S		S			S	S	S		S		S	S				0	All repeated mecA results are neg	Referral	No	No		S	S	S	S	S		S			S	S	S		S
84571	2008	CANINE	MIXED BREED DOG	MALE CASTRATED	joint	21	32	28		S	S	S	S		S			S	S	S		S		S	S						Referral				S	S	S	S	S		S			S	S	S		S
81054	2008	CANINE			skin	21	34	30		S	R	S	S		S			S	S	S		R		S	S						Referral				S	R	S	S	S		S			S	S	S		R
090508	2009	CANINE			mammary	19	33			S	R	S	S		S			S	R	R		R		R	R						Referral				S	R		S	S		S			S	R	R		R
060297	2006	CANINE	IRISH SETTER	MALE CASTRATED	nasal	23	34	30		S	R	S	S		S			S	S	S		R		R	S				41.62		Clinical	No	No		S	R	S	S	S		S			S	S	S		R
063630	2006	CANINE	MINIATURE SCHNAUZER 20-30LBS	MALE CASTRATED	skin	22	35	32		S	R	S	S		R			R	S	S		R		R	S					0	Clinical	No	No		S	R	S	S	S		R			R	S	S		R
84253	2008	CANINE	MINIATURE SCHNAUZER 20-30LBS	MALE CASTRATED	skin	6	20	6		R	R	S	S		S			S	R	S		R		S	S						Clinical				R	R	R	S	S		S			S	R	S		R
85615	2008	CANINE	MIXED BREED DOG	FEMALE SPAYED	skin	24	34			S	S	S	S		S			S	S	S		S		S	S						Clinical				S	S		S	S		S			S	S	S		S
070645	2007	CANINE	PEKINGESE	FEMALE SPAYED	skin	23	35	31		S	R	S	R		R			R	S	S		R		R	I						Clinical				S	R	S	S	R		R			R	S	S		R
094469	2009	CANINE			bone	20	35	30		S	R	S	S		S			S	S	S		R		S	S						Referral				S	R	S	S	S		S			S	S	S		R
092676d	2009	CANINE			urine	6	19	10		S	R	S	S		R			R	I	R		R		R	R					Neg	Referral				S	R	R	S	S		R			R	R	R		R
092676e	2009	CANINE			urine	13	28	20		S	R	S	S		R			R	S	R		R		R	R					POS	Referral				S	R	R	S	S		R			R	S	R		R
093503a	2009	CANINE			urine	10	25	13		S	R	S	S		R			R	S	R		R		R	R					wk POS	Referral				S	R	R	S	S		R			R	S	R		R
093503b	2009	CANINE			urine	16	33	26		S	R	S	S		R			R	I	R		R		R	R					POS	Referral				S	R	S	S	S		R			R	R	R		R
073269	2007	CANINE	RAT TERRIER	FEMALE SPAYED	joint	16				S	R	S	S		R			R	S	S		R		S	S						Clinical				S	R		S	S		R			R	S	S		R
84239	2008	CANINE	BOXER	MALE	urine	20	33	28		S	R	S	S		S			S	S	S		R		S	S						Clinical				S	R	S	S	S		S			S	S	S		R
85510	2008	CANINE	BOXER	MALE	urine	19	34			S	R	S	S		S			S	S	S		R		S	S						Clinical				S	R		S	S		S			S	S	S		R
85784	2008	CANINE			skin	23	32			S	S	S	S		S			S	S	S		S		S	S						Referral				S	S		S	S		S			S	S	S		S
85785	2008	CANINE			skin	24	32			S	S	S	S		S			S	S	S		S		S	S						Referral				S	S		S	S		S			S	S	S		S
85786	2008	CANINE			skin	23	32			S	S	S	S		S			S	S	S		S		S	S						Referral				S	S		S	S		S			S	S	S		S
076050	2007	CANINE	MINIATURE SCHNAUZER 20-30LBS	FEMALE SPAYED	skin	21				S	R	S	S	S	S			S	S			R		S	S						Clinical				S	R		S	S	S	S			S	S			R
092121	2009	CANINE			skin	6	22	6		R	R	I	S		I			S	R	S		R		S	I					POS	Referral				R	R	R	R	S		R			S	R	S		R
061034	2006	CANINE	PEKINGESE	FEMALE SPAYED	skin	30	35	35		S	S	S	S		S			S	S	S		S		S	S				0		Referral	No	No		S	S	S	S	S		S			S	S	S		S
062407a	2006	CANINE	NEOPOLITAN MASTIFF	MALE	skin	22	35	31		S	R	S	S		S			S	S	S		R		R	R		0.19		41.25		Clinical	No	No		S	R	S	S	S		S			S	S	S		R
062407b	2006	CANINE	NEOPOLITAN MASTIFF	MALE	skin	17	32	23		S	R	S	S		S			S	S	S		R		R	S		>256		POS	0	Clinical	No	No		S	R	S	S	S		S			S	S	S		R
062853	2006	CANINE			ear	26	41	>21		S	R	S	S		S			S	S	S		R		S	S				0		Referral	No	No		S	R	S	S	S		S			S	S	S		R
072270	2007	CANINE			skin	6	22	6		S	R	S	S		S			S	I	S		R		S	S					mec+, Type 3	Referral				S	R	R	S	S		S			S	R	S		R
072983	2007	CANINE	LABRADOR RETRIEVER	MALE CASTRATED	skin	20	33	29		S	R	S	S		R			R	S	R		R		R	R						Clinical				S	R	S	S	S		R			R	S	R		R
82622	2008	CANINE	COCKER SPANIEL	FEMALE SPAYED	skin	6	21	6		S		S	S		R			R	I	R		R		R	R						Clinical				S		R	S	S		R			R	R	R		R
84304	2008	CANINE	MINIATURE SCHNAUZER 20-30LBS	FEMALE SPAYED	skin	19	33	29		S	R	S	S		S			S	S	S		R		R	S						Clinical				S	R	S	S	S		S			S	S	S		R
85397	2008	CANINE	MIXED BREED DOG	MALE CASTRATED	joint	6	22			S	R	S	S		R			R	S	R		R		R	R						Clinical				S	R		S	S		R			R	S	R		R
090412	2009	CANINE			skin	10	25			S	R	S	S		R			R	S	R		R		R	R					POS	Referral				S	R		S	S		R			R	S	R		R
092537a	2009	CANINE	ROTTWEILER	MALE CASTRATED	skin	6	21	6	S	R	R	S	S		R	I		R	I	R	R	R	S	R	R					POS	Clinical			S	R	R	R	S	S		R	R		R	R	R	R	R	S
092537b	2009	CANINE	ROTTWEILER	MALE CASTRATED	skin	6	11	6	S	R	R	I	S		S	S		R	S	R	S	R	S	S	S					POS	Clinical			S	R	R	R	R	S		S	S		R	S	R	S	R	S
093119	2009	CANINE	MIXED BREED DOG	FEMALE SPAYED	skin	23	36	28		S	R	S	S		S			S	S	S		R		S	S						Clinical				S	R	S	S	S		S			S	S	S		R
82352	2008	CANINE			skin	11	24	13		S		S	S		R			R	I	R		R		R	R					mec+, Type 5	Referral				S		R	S	S		R			R	R	R		R
83403	2008	CANINE			skin	12	25	14	S	S	R	S	S		R	I		R	S	R	I	R	S	R	R						Referral			S	S	R	R	S	S		R	R		R	S	R	R	R	S
81341	2008	CANINE	MIXED BREED DOG	MALE CASTRATED	urine	26	38	36		S	R	S	S		S			S	S	S		R		S	S						Clinical				S	R	S	S	S		S			S	S	S		R
81351	2008	CANINE	MIXED BREED DOG	MALE CASTRATED	urine	24	40	36		S	R	S	S		S			S	S	S		R		S	I						Clinical				S	R	S	S	S		S			S	S	S		R
062991	2006	CANINE	MIXED BREED DOG	FEMALE SPAYED	LN	26	35	29		S	S	S	S		S			S	S	S		S		S	S				38.06		Clinical	No	No		S	S	S	S	S		S			S	S	S		S
072947	2007	CANINE	PUG	MALE CASTRATED	skin	20	27	21		S	R	S	S		R			R	S	S		R		R	S						Clinical				S	R	S	S	S		R			R	S	S		R
073779	2007	CANINE	SIBERIAN HUSKY	MALE CASTRATED	skin	22	25	25		S	R	S	S		R			R	R	S		R		R	R						Clinical				S	R	S	S	S		R			R	R	S		R
074254	2007	CANINE	GOLDEN RETRIEVER	FEMALE SPAYED	ear	24	34	30		S	S	S	S		S			S	S	S		S		S	S						Clinical				S	S	S	S	S		S			S	S	S		S
81378	2008	CANINE	SIBERIAN HUSKY	MALE CASTRATED	skin	25				S	R	S	S		R			R	R	S		R		R	R						Clinical				S	R		S	S		R			R	R	S		R
090006	2009	CANINE	MIXED BREED DOG	MALE CASTRATED	skin	22	32			S	S	S	S		S			S	S	S		S		S	S					Neg	Clinical				S	S		S	S		S			S	S	S		S
091472	2009	CANINE	OLD ENGLISH SHEEPDOG	MALE CASTRATED	skin	22	34	32		S	S	S	S		S			S	S	S		S		S	S					Neg	Clinical				S	S	S	S	S		S			S	S	S		S
091633	2009	CANINE			skin	17	33	28		S	R	S	S		S			S	S	S		R		R	I	=0.25				Neg	Referral				S	R	S	S	S		S			S	S	S		R
093392	2009	CANINE	MASTIFF	MALE CASTRATED	skin	21	33	29		S	R	S	S		S			S	S	S		R		R	S						Clinical				S	R	S	S	S		S			S	S	S		R
093684a	2009	CANINE	MASTIFF	MALE CASTRATED	skin	11	26	16		S	R	S	S		R			R	I	R		R		R	R					POS	Clinical				S	R	R	S	S		R			R	R	R		R
093684d	2009	CANINE	MASTIFF	MALE CASTRATED	skin	19	32	27		S	R	S	S		S			S	S	S		R		R	S					Neg	Clinical				S	R	S	S	S		S			S	S	S		R
094198	2009	CANINE			urine	22	35	31		S	R	S	S		S			S	S	S		R		R	S						Referral				S	R	S	S	S		S			S	S	S		R
70253	2008	CANINE	DOBERMAN PINSCHER	MALE CASTRATED	skin	21	33	30		S	R	S	S		S			S	S	S		R		R	S						Clinical				S	R	S	S	S		S			S	S	S		R
84318	2008	CANINE			ear	21	31	28		S	R	S	S		S			S	S	S		R		S	S						Referral				S	R	S	S	S		S			S	S	S		R
82739	2008	CANINE	PEMBROKE WELSH CORGI	FEMALE	skin	24	33	28		S	S	S	S		S			S	S	S		S		S	S					0, no band	Clinical				S	S	S	S	S		S			S	S	S		S
81961	2008	CANINE	SIBERIAN HUSKY	MALE CASTRATED	skin	21	32	30		S	R	S	S		R			R	S	S		R		R	S					0, no band	Clinical				S	R	S	S	S		R			R	S	S		R
85222	2008	CANINE	SIBERIAN HUSKY	MALE CASTRATED	skin	20	34	31		S	R	S	S		R			R	S	S		R		R	S						Clinical				S	R	S	S	S		R			R	S	S		R
091272	2009	CANINE			urine	6	21	6		S	R	S	S		R			R	S	R		R		R	R					POS	Referral				S	R	R	S	S		R			R	S	R		R
075101	2007	CANINE			urine	19	33	28		S	R	S	S		S			S	R	S		R		S	S						Referral				S	R	S	S	S		S			S	R	S		R
073362	2007	CANINE	LABRADOR RETRIEVER		ear	23	35	31		S	R	S	S		S			S	S	S		R		S	S						Referral				S	R	S	S	S		S			S	S	S		R
090689	2009	CANINE	MALTESE DOG	MALE CASTRATED	skin	14	28		S	S	R	S	S		R	S		R	S	S	S	R	S	S	S					POS	Clinical			S	S	R		S	S		R	S		R	S	S	S	R	S
82181	2008	CANINE	BELGIAN MALINOIS	FEMALE SPAYED	urine	23	34	30		S		S	S		S			S	S	S		R		S	S					0, no band	Clinical				S		S	S	S		S			S	S	S		R
090955	2009	CANINE			nasal	16	26			S	R	S	S		S			S	S	S		R		S	S						Referral				S	R		S	S		S			S	S	S		R
091782a	2009	CANINE	GOLDEN RETRIEVER	MALE CASTRATED	skin	11	27	16		S	R	S	S		R			R	S	S		R		S	R					POS	Clinical				S	R	R	S	S		R			R	S	S		R
091782b	2009	CANINE	GOLDEN RETRIEVER	MALE CASTRATED	skin	6	25	6		S	R	S	S		R			R	S	S		R		S	R					POS	Clinical				S	R	R	S	S		R			R	S	S		R
81804	2008	CANINE	MIXED BREED DOG	MALE CASTRATED	skin	6	23	8	S	S	R	S	S		R	I		R	I	R		R	S	R	R					mec+, Type 5	Clinical			S	S	R	R	S	S		R	R		R	R	R		R	S
84827	2008	CANINE			ear	18	32	28		S	R	S	S		S			S	S	S		R		S	S						Referral				S	R	S	S	S		S			S	S	S		R
81976	2008	CANINE	LABRADOR RETRIEVER	FEMALE	skin	22	35	30		S	R	S	S		S			S	S	S		R		S	S					0, no band	Referral				S	R	S	S	S		S			S	S	S		R
091698	2009	CANINE			skin	10	27	16		S	R	S	S		R			R	I	R		R		R	R					POS	Referral				S	R	R	S	S		R			R	R	R		R
094727	2009	CANINE			urine	21	32	30		S	S	S	S		S			S	S	S		S		R	S						Referral				S	S	S	S	S		S			S	S	S		S
82094	2008	CANINE			skin	11	25	15		S	R	S	S		R			R	S	S		R		R	S					mec+, no band	Referral				S	R	R	S	S		R			R	S	S		R
82954a	2008	CANINE	SHIH TZU	MALE CASTRATED	eye	6	23	6		R	R	S	S	I	S			S	R	R		R		S	S					mec+,	Clinical				R	R	R	S	S	R	S			S	R	R		R
82954b	2008	CANINE	SHIH TZU	MALE CASTRATED	eye	20	33	29		S	R	S	S	S	S			S	S	S		R		R	S					0,	Clinical				S	R	S	S	S	S	S			S	S	S		R
075164	2007	CANINE	MIXED BREED DOG	FEMALE	ear	20	36	30		S	R	S	S		S			S	S	S		R		S	S						Referral				S	R	S	S	S		S			S	S	S		R
076377	2007	CANINE			ear	22	38	30		S	R	S	S		S			S	I	S		R		S	S						Referral				S	R	S	S	S		S			S	R	S		R
092525	2009	CANINE			skin	10	23	13		S	R	S	S		R			R	R	R		R		R	R					POS	Referral				S	R	R	S	S		R			R	R	R		R
092899a	2009	CANINE			skin	6	6	6		R	R	R	S		R			R	S	R		R		S	S					POS	Referral				R	R	R	R	S		R			R	S	R		R
092899b	2009	CANINE			skin	10	26	15		S	R	S	S		R			R	I	R		R		R	R					POS	Referral				S	R	R	S	S		R			R	R	R		R
075977	2007	CANINE	PEMBROKE WELSH CORGI	FEMALE SPAYED	urine	28	37	36		S	R	S	S		S			S	S	S		R		S	S						Clinical				S	R	S	S	S		S			S	S	S		R
060837	2006	CANINE			ear	22	35	28		S	R	S	S		S			S	S	S		R		S	S		0.38		36.43		Referral	No	No		S	R	S	S	S		S			S	S	S		R
091601	2009	CANINE	WEST HIGHLAND WHITE TERRIER	FEMALE	ear	21	35	32		S	S	S	S		S			S	S	S		S		S	S						Clinical				S	S	S	S	S		S			S	S	S		S
074019	2007	CANINE	BOXER	MALE CASTRATED	bone	20	26	22		S	R	S	S		S			S	S	S		R		S	S						Clinical				S	R	S	S	S		S			S	S	S		R
062255	2006	CANINE	BASSET HOUND	MALE CASTRATED	skin	25	37	32		S	R	S	S		S			S	S	S		R		S	S				0		Referral	No	No		S	R	S	S	S		S			S	S	S		R
063241	2006	CANINE			urine	29	35	32		S	S	S	S		S			S	S	S		S		S	S					0	Referral	No	No		S	S	S	S	S		S			S	S	S		S
091924	2009	CANINE	GREAT DANE	MALE CASTRATED	skin	19	35	28		S	R	S	S		R			R	S	R		R		R	R						Clinical				S	R	S	S	S		R			R	S	R		R
84208	2008	CANINE			skin	20	33	25		S	R	S	S		S			S	S	S		R		S	S						Referral				S	R	S	S	S		S			S	S	S		R
84537	2008	CANINE	GREAT DANE	MALE CASTRATED	skin	18	31	29		S	R	S	S		S			S	S	S		R		S	I						Clinical				S	R	S	S	S		S			S	S	S		R
064800	2006	CANINE	COCKER SPANIEL	MALE	skin	6	23	6		R	R	S	S		S			S	I	R		R		S	S				POS	0	Referral	No	No		R	R	R	S	S		S			S	R	R		R
81129b	2008	CANINE			skin	24	34	28		S	S	S	S		S			S	S	S		S		R	S						Referral				S	S	S	S	S		S			S	S	S		S
81129c	2008	CANINE			skin	22	36	31		S	R	S	S		S			S	S	S		R		S	S						Referral				S	R	S	S	S		S			S	S	S		R
073979	2007	CANINE			skin	20	33	30		S	R	S	S		S			S	R	R		R		S	S						Referral				S	R	S	S	S		S			S	R	R		R
093523	2009	CANINE			bone	18	31	28		S	R	S	S		S			S	S	S		R		S	S						Referral				S	R	S	S	S		S			S	S	S		R
074668	2007	CANINE	ROTTWEILER	MALE CASTRATED	skin	8	24	10		S	R	S	S		R			R	R	R		R		R	R					mec+, Type 5	Clinical				S	R	R	S	S		R			R	R	R		R
074680	2007	CANINE	ROTTWEILER	MALE CASTRATED	joint	6	24	6		S	R	S	S		R			R	I	R		R		R	R					mec+, Type 5	Clinical				S	R	R	S	S		R			R	R	R		R
075710	2007	CANINE	ROTTWEILER	MALE CASTRATED	skin	6	22	8		S	R	S	S		R			R	I	R		R		R	R					mec+, Type 5	Clinical				S	R	R	S	S		R			R	R	R		R
81121	2008	CANINE	ROTTWEILER	MALE CASTRATED	joint	6	24	6	S	S	R	S	S		R	I		R	I	R		R	S	R	R					mec+, Type 5	Clinical			S	S	R	R	S	S		R	R		R	R	R		R	S
81387	2008	CANINE	ROTTWEILER	MALE CASTRATED	joint	6	23	6	S	S	R	S	S		R	I		R	I	R		R	S	R	R					mec+, Type 5	Clinical			S	S	R	R	S	S		R	R		R	R	R		R	S
81617	2008	CANINE	ROTTWEILER	MALE CASTRATED	skin	6	23	6	S	S	R	S	S		R	I		R	I	R		R	S	R	R						Clinical			S	S	R	R	S	S		R	R		R	R	R		R	S
82196	2008	CANINE	ROTTWEILER	MALE CASTRATED	nasal/axilla	6	23	9		S		S	S		S			S	S	R		R		R	R					mec+, Type 5	Clinical				S		R	S	S		S			S	S	R		R
091930	2009	CANINE	ROTTWEILER	FEMALE SPAYED	skin	13	27	16	S	S	R	S	S		R	I		R	I	R	R	R	S	R	R					Neg; POS	Clinical			S	S	R	R	S	S		R	R		R	R	R	R	R	S
092232	2009	CANINE	ROTTWEILER	FEMALE SPAYED	skin	6	23	8	S	S	R	S	S		R	I		R	I	R	I	R	S	R	R					POS	Clinical			S	S	R	R	S	S		R	R		R	R	R	R	R	S
060154	2006	CANINE			vulva	25	35	30		S	R	S	S		S			S	S	S		R		S	S				41.13		Referral	No	No		S	R	S	S	S		S			S	S	S		R
061428	2006	CANINE	MIXED BREED DOG	FEMALE SPAYED	skin	26	39	33		S	R	S	S		S			S	S	S		R		S	S				0		Clinical	No	No		S	R	S	S	S		S			S	S	S		R
061705	2006	CANINE	MIXED BREED DOG	FEMALE SPAYED	skin	27	42	34		S	S	S	S		S			S	S	S		S		S	S				38.63		Clinical	No	No		S	S	S	S	S		S			S	S	S		S
061717	2006	CANINE	MIXED BREED DOG	FEMALE SPAYED	skin	25	40	34		S	R	S	S		S			S	S	S		R		S	S				0		Clinical	No	No		S	R	S	S	S		S			S	S	S		R
063018	2006	CANINE	MIXED BREED DOG	FEMALE SPAYED	skin	6	22	10		S	R	S	S		R			R	I	R		R		R	R		>256		27.12	Type 5 (414 bp)	Clinical	No	No		S	R	R	S	S		R			R	R	R		R
070182a	2007	CANINE	STAFFORDSHIRE TERRIER	MALE	skin	22	34	31		S	R	S	R		R			R	S	S		R		S	R					Neg	Clinical				S	R	S	S	R		R			R	S	S		R
070182b	2007	CANINE	STAFFORDSHIRE TERRIER	MALE	skin	23	37	35		S	R	S	S		S			S	S	S		R		S	S						Clinical				S	R	S	S	S		S			S	S	S		R
85631	2008	CANINE	MALTESE DOG	FEMALE SPAYED	skin	19	33			S	R	S	S		I			S	S	S		R		R	S						Clinical				S	R		S	S		R			S	S	S		R
061369	2006	CANINE	GOLDEN RETRIEVER	FEMALE SPAYED	joint	24	36	31		S	R	S	S		S			S	S	S		R		R	S				0		Clinical	No	No		S	R	S	S	S		S			S	S	S		R
090532	2009	CANINE			joint	23	34			S	S	S	S		S			S	S	S		S		S	S						Referral				S	S		S	S		S			S	S	S		S
061164	2006	CANINE	BOSTON TERRIER	MALE CASTRATED	skin	15	27	17		S	R	S	S		S			S	I	R		R		R	I		1.5		28.3	Type 5 (324 bp)	Clinical	No	No		S	R	R	S	S		S			S	R	R		R
061186	2006	CANINE	BOSTON TERRIER	MALE CASTRATED	nasal	15	28	18		S	R	S	S		S			S	S	R		R		R	R		1.5		29.66	Type 5 (314 bp)	Clinical	No	No		S	R	R	S	S		S			S	S	R		R
073231	2007	CANINE			urine	22	37	34		S	R	S	S		S			S	S	S		R		S	S						Referral				S	R	S	S	S		S			S	S	S		R
094173	2009	CANINE	CHIHUAHUA	FEMALE SPAYED	urine	18	33	28		S	R	S	S		S			S	S	S		R		R	R						Clinical				S	R	S	S	S		S			S	S	S		R
063134	2006	CANINE	WEST HIGHLAND WHITE TERRIER	FEMALE SPAYED	skin	6	23	6		S	R	S	S		R			R	I	R		R		R	R		>256		29.35	Type 5 (355 bp)	Clinical	No	No		S	R	R	S	S		R			R	R	R		R
064511	2006	CANINE	WEST HIGHLAND WHITE TERRIER	FEMALE SPAYED	skin	6	23	8		S	R	S	S		R			R	R	R		R		R	R		64			Type 5	Clinical	No	No		S	R	R	S	S		R			R	R	R		R
070194	2007	CANINE	WEST HIGHLAND WHITE TERRIER	FEMALE SPAYED	skin	6	24	6		S	R	S	S		R			R	S	R		R		R	R					mec+, Type 5	Clinical				S	R	R	S	S		R			R	S	R		R
074455	2007	CANINE	WEST HIGHLAND WHITE TERRIER	FEMALE SPAYED	urine	6				R	R	S	S		R			R	I	R		R		R	R						Clinical				R	R		S	S		R			R	R	R		R
84457	2008	CANINE			skin	18	33	29		S	R	S	R		R			R	S	S		R		R	R						Referral				S	R	S	S	R		R			R	S	S		R
073864	2007	CANINE	PUG	MALE CASTRATED	skin	6	22	6		S	R	S	S		S			S	I	S		R		S	S					mec+, no band	Clinical				S	R	R	S	S		S			S	R	S		R
064093	2006	CANINE	CAVALIER KING CHARLES SPANIEL	FEMALE SPAYED	urine	29	36	33		S	R	S	S		S		S	S	S	S		R		S	I					0	Clinical	No	No		S	R	S	S	S		S		S	S	S	S		R
064124	2006	CANINE	CAVALIER KING CHARLES SPANIEL	FEMALE SPAYED	kidney	25	36	31		S	R	S	S		S		S	S	S	S		R		S	S					0	Clinical	No	No		S	R	S	S	S		S		S	S	S	S		R
073238	2007	CANINE	MIXED BREED DOG	FEMALE SPAYED	vaginal	20	33	29		S	R	S	S		S			S	S	S		R		S	S						Clinical				S	R	S	S	S		S			S	S	S		R
80112	2008	CANINE	LABRADOR RETRIEVER	MALE CASTRATED	skin	24	32	28		S	S	S	S		S			S	S	S		S		S	S						Clinical				S	S	S	S	S		S			S	S	S		S
80128	2008	CANINE	MIXED BREED DOG	MALE	skin	8	21	12		S	R	S	S		R			R	I	R		R		R	R					mec+, Type 5	Clinical				S	R	R	S	S		R			R	R	R		R
092030	2009	CANINE	LABRADOR RETRIEVER	MALE CASTRATED	skin	12	25	15	S	S	R	S	S		R	I		R	I	R	R	R	S	R	R					POS	Clinical			S	S	R	R	S	S		R	R		R	R	R	R	R	S
072279	2007	CANINE	FOX TERRIER	FEMALE SPAYED	skin	20	32	28		S	R	S	S	S	S			S	R	S		R		S	S						Clinical				S	R	S	S	S	S	S			S	R	S		R
073721	2007	CANINE	SHIH TZU	FEMALE SPAYED	eye	19	33	29		S	R	S	S	S	S			S	S	S		R		R	I						Clinical				S	R	S	S	S	S	S			S	S	S		R
81483	2008	CANINE	STAFFORDSHIRE TERRIER	FEMALE SPAYED	skin	25	34	31		S	S	S	S		S			S	S	S		S		S	S						Clinical				S	S	S	S	S		S			S	S	S		S
063056	2006	CANINE	BELGIAN MALINOIS	MALE	joint	13	24	15		S	R	S	S		R			R	S	R		R		R	R		>256		28.53	Type 5 (400 bp)	Clinical	No	No		S	R	R	S	S		R			R	S	R		R
094414	2009	CANINE			skin	12	25	17		S	S	S	S		R			R	S	S		R		R	S					POS	Referral				S	S	R	S	S		R			R	S	S		R
071995	2007	CANINE	MINIATURE SCHNAUZER 20-30LBS	MALE CASTRATED	skin	22	35	30		S	R	S	S		S		S	S	S	S		R		S	S						Clinical				S	R	S	S	S		S		S	S	S	S		R
85265	2008	CANINE	MIXED BREED DOG	FEMALE SPAYED	ear	20	37	30		S	R	S	S		S			S	S	S		R		S	S						Clinical				S	R	S	S	S		S			S	S	S		R
091109	2009	CANINE			skin	18	30	30		S	R	S	R		R			R	S	S		R		S	S						Referral				S	R	S	S	R		R			R	S	S		R
075278	2007	CANINE	NEWFOUNDLAND	MALE	skin	22	34	31		S	R	S	S		S			S	S	S		R		R	S						Clinical				S	R	S	S	S		S			S	S	S		R
81438	2008	CANINE	NEWFOUNDLAND	MALE	skin	6	22	6	S	R	R	S	S		R	I		R	I	R		R	S	R	R					mec+, Type 5	Clinical			S	R	R	R	S	S		R	R		R	R	R		R	S
84730	2008	CANINE	MIXED BREED DOG	MALE CASTRATED	bone	6	18	6	S	R	R	R	S		R	I		R	S	R	I	R	S	R	R						Clinical			S	R	R	R	R	S		R	R		R	S	R	R	R	S
85643	2008	CANINE	MINIATURE SCHNAUZER 20-30LBS	FEMALE	urine	22	36			S	R	S	S		S			S	S	S		R		S	S						Clinical				S	R		S	S		S			S	S	S		R
071290	2007	CANINE	LABRADOR RETRIEVER	FEMALE SPAYED	skin	26	34	30		S	S	S	S		S			S	S	S		S		S	S						Clinical				S	S	S	S	S		S			S	S	S		S
071495	2007	CANINE	LABRADOR RETRIEVER	FEMALE SPAYED	skin	10	24	13		S	R	S	S		R		R	R	S			R		R	R					mec+, Type 4d*	Clinical				S	R	R	S	S		R		R	R	S			R
071683	2007	CANINE	LABRADOR RETRIEVER	FEMALE SPAYED	bone	9	24	13		S	R	S	S		R			R	S	R		R		R	R					mec+, Type 5	Clinical				S	R	R	S	S		R			R	S	R		R
85064	2008	CANINE	MIXED BREED DOG	MALE CASTRATED	skin	18	33	30		S	R	S	S		S	S		S	S	S	I	R		R	S						Clinical				S	R	S	S	S		S	S		S	S	S	R	R
075057b	2007	CANINE	MIXED BREED DOG	FEMALE SPAYED	skin	22	35	30		S	R	S	S		S			S	R	S		R		R	S					Neg	Clinical				S	R	S	S	S		S			S	R	S		R
075057c	2007	CANINE	MIXED BREED DOG	FEMALE SPAYED	skin	16	29	20		S	R	S	S		S			S	S	S		R		S	S					mec+, no band*	Clinical				S	R	R	S	S		S			S	S	S		R
81895	2008	CANINE			ear	6	19	6		R	R	S	S		S			S	I	S		R		S	S					mec+, Type 3	Referral				R	R	R	S	S		S			S	R	S		R
093103a	2009	CANINE			ear	6	17	6		R	R	R	S		S			S	I	S		R		S	S					POS	Referral				R	R	R	R	S		S			S	R	S		R
093103b	2009	CANINE			ear	14	27	19		S	R	S	S		R			R	I	R		R		R	R					POS	Referral				S	R	R	S	S		R			R	R	R		R
81801	2008	CANINE			skin	20				S	R	S	S		R			R	S	R		R		S	S						Referral				S	R		S	S		R			R	S	R		R
070874	2007	CANINE	PUG	FEMALE SPAYED	skin	23	35	31		S	R	S	S		S			S	S	S		R		S	S						Clinical				S	R	S	S	S		S			S	S	S		R
090873	2009	CANINE	MIXED BREED DOG	MALE CASTRATED	skin	17	34			S	R	S	S		S			S	S	S		R		S	S					Neg	Clinical				S	R		S	S		S			S	S	S		R
091331	2009	CANINE			ear	23	33	28		S	R	S	S		S			S	S	S		R		S	S					Neg	Referral				S	R	S	S	S		S			S	S	S		R
092018	2009	CANINE	MIXED BREED DOG	MALE CASTRATED	skin	20	33	28		S	R	S	S		S			S	S	S		R		R	S						Clinical				S	R	S	S	S		S			S	S	S		R
076456	2007	CANINE			ear	19	35	31		S	R	S	S		S			S	S	S		R		S	R						Referral				S	R	S	S	S		S			S	S	S		R
81698	2008	CANINE	MINIATURE SCHNAUZER 20-30LBS	FEMALE SPAYED	skin	24	32	28		S	S	S	S		S			S	S	S		S		S	S						Clinical				S	S	S	S	S		S			S	S	S		S
090331b	2009	CANINE			ear	20	30			S	S	S	S		S			S	I	S		S		S	S						Referral				S	S		S	S		S			S	R	S		S
090331c	2009	CANINE			ear	10	30			S	R	S	S		S			S	I	R		R		R	S					POS	Referral				S	R		S	S		S			S	R	R		R
060374	2006	CANINE	MALTESE DOG	MALE CASTRATED	urine	20	33	26		S	R	S	S		S			S	S	S		R		R	I		0.047		0		Clinical	No	No		S	R	S	S	S		S			S	S	S		R
070703	2007	CANINE	COCKER SPANIEL	FEMALE SPAYED	ear	28	32	32		S	S	S	S		S			S	S	S		S		S	S						Referral				S	S	S	S	S		S			S	S	S		S
82589	2008	CANINE			urine	20	34	29		S		S	S		S			S	S	S		R		S	S					0, no band	Referral				S		S	S	S		S			S	S	S		R
83874	2008	CANINE	SCOTTISH TERRIER	MALE CASTRATED	skin	18	32	29		S	R	S	S		S			S	S	S		R		S	S						Clinical				S	R	S	S	S		S			S	S	S		R
090815	2009	CANINE	MIXED BREED DOG	FEMALE SPAYED	skin	21	34			S	S	S	S		S			S	S	S		S		S	S						Clinical				S	S		S	S		S			S	S	S		S
81546	2008	CANINE			skin	23	34	31		S	R	S	S		S			S	S	S		R		S	S						Referral				S	R	S	S	S		S			S	S	S		R
81546	2008	CANINE			skin	18	24	22		S	R	S	S		R			R	S	R		R		S	S						Referral				S	R	S	S	S		R			R	S	R		R
80555	2008	CANINE	WEIMARANER	MALE	skin	21	36	32		S	R	S	S		S			S	S	S		R		S	S						Clinical				S	R	S	S	S		S			S	S	S		R
81644	2008	CANINE	COONHOUND,BLACK & TAN	FEMALE SPAYED	nasal	20	33	30		S	R	S	S		R			R	S	S		R		R	S						Clinical				S	R	S	S	S		R			R	S	S		R
074984	2007	CANINE			ear	22	32	29		S	R	S	S		S			S	S	S		R		S	S						Referral				S	R	S	S	S		S			S	S	S		R
074984	2007	CANINE			ear	20	33	29		S	S	S	S		S			S	R	S		S		S	S						Referral				S	S	S	S	S		S			S	R	S		S
074941	2007	CANINE	ENGLISH BULLDOG	MALE	ear	20	33	28		S	R	S	S		S			S	S	S		R		S	S						Clinical				S	R	S	S	S		S			S	S	S		R
075149	2007	CANINE	ENGLISH BULLDOG	MALE	skin	20	34	28		S	R	S	S		S			S	S	S		R		S	S						Clinical				S	R	S	S	S		S			S	S	S		R
82670	2008	CANINE			skin	14	29	19		S	R	S	S		R			R	I	I		R		R	R					0, no band	Referral				S	R	R	S	S		R			R	R	R		R
090389	2009	CANINE			urine	20	33			S	R	S	S		S			S	S	S		R		S	I					Neg	Referral				S	R		S	S		S			S	S	S		R
062986	2006	CANINE	MIXED BREED DOG	FEMALE SPAYED	skin	23	35	30		S	R	S	S		R			R	S	S		R		R	S		0.25		36.8		Referral	No	No		S	R	S	S	S		R			R	S	S		R
83659	2008	CANINE			skin	20	26	21		S	S	S	S		S			S	S	S		S		S	S						Referral				S	S	S	S	S		S			S	S	S		S
073777	2007	CANINE	MINIATURE POODLE	FEMALE SPAYED	ear	25	30	26		S	S	S	S		S			S	S	S		S		S	S						Clinical				S	S	S	S	S		S			S	S	S		S
072436	2007	CANINE	STANDARD SCHNAUZER 30-40LBS	FEMALE SPAYED	urine	22	30	25		S	S	S	S		S			S	S	S		S		S	S						Clinical				S	S	S	S	S		S			S	S	S		S
074399	2007	CANINE	CHOW CHOW	MALE CASTRATED	skin	6	22	8		S	R	S	S		R			R	I	R		R		R	R					mec+, Type 5	Clinical				S	R	R	S	S		R			R	R	R		R
073256	2007	CANINE			skin	6	22	6		S	R	S	S		R			R	R	R		R		R	R					mec+, Type 5	Referral				S	R	R	S	S		R			R	R	R		R
062494	2006	CANINE	COCKER SPANIEL	MALE	ear	17	30	22		S	S	S	S		S			S	S	S		S		S	S				26.85	Type 4a	Referral	No	No		S	S	S	S	S		S			S	S	S		S
84234	2008	CANINE	MINIATURE SCHNAUZER 20-30LBS	FEMALE SPAYED	urine	22	32	26		S	R	S	S		S			S	S	S		R		S	S						Clinical				S	R	S	S	S		S			S	S	S		R
092883	2009	CANINE			skin	8	25	13		S	R	S	S		R			R	S	S		R		S	R					POS	Referral				S	R	R	S	S		R			R	S	S		R
82467	2008	CANINE			skin	23	32	28		S		S	S		S			S	I	S		S		S	S						Referral				S		S	S	S		S			S	R	S		S
090907	2009	CANINE			ear	6	15	6		R	R	R	S		S			S	R	S		R		S	S					POS	Referral				R	R	R	R	S		S			S	R	S		R
093894	2009	CANINE			ear	11	24	16	S	S	R	S	S		R	I		R	I	R	R	R	S	R	R					POS	Referral			S	S	R	R	S	S		R	R		R	R	R	R	R	S
060471	2006	CANINE	MIXED BREED DOG	FEMALE SPAYED	skin	16	26	18		S	R	S	S		R			R	S	R		R		R	R		96		24.94	Type 5 (300 bp)	Clinical	No	No		S	R	R	S	S		R			R	S	R		R
82767	2008	CANINE			skin	6	19	6		R	R	R	S		R			R	R	R		R		R	R					mec+,	Referral				R	R	R	R	S		R			R	R	R		R
062814	2006	CANINE	ESKIMO	FEMALE SPAYED	urine	24	35	31		S	R	S	S		S			S	S	S		R		S	S				40.15		Clinical	No	No		S	R	S	S	S		S			S	S	S		R
094597	2009	CANINE	MIXED BREED DOG	FEMALE SPAYED	skin	6	25	6		S	R	R	S		S			S	S	I		R		S	S					Neg	Clinical				S	R	R	R	S		S			S	S	R		R
062318	2006	CANINE	ENGLISH BULLDOG	FEMALE	pericardium	24	35	32		S	R	S	S		R			R	R	S		R		R	R		0.19		38.52		Clinical	No	No		S	R	S	S	S		R			R	R	S		R
063412	2006	CANINE	PUG	FEMALE SPAYED	skin	21	35	31		S	R	S	S		S			S	S	S		R		R	S		0.19			0	Clinical	No	No		S	R	S	S	S		S			S	S	S		R
064676	2006	CANINE	BLOODHOUND	MALE CASTRATED	urine	26	34	30		S	S	S	S		S			S	S	S		S		R	S					0	Clinical	No	No		S	S	S	S	S		S			S	S	S		S
064939	2006	CANINE	PUG	FEMALE SPAYED	skin	16	30	19		S	S	S	S		R			R	S	I		S		S	S					Type 4a	Clinical	No	No		S	S	R	S	S		R			R	S	R		S
064943	2006	CANINE	PUG	FEMALE SPAYED	ear	17	32	22		S	S	S	S		R			R	S	S		S		S	S					Type 4a	Clinical	No	No		S	S	S	S	S		R			R	S	S		S
072422	2007	CANINE	MALTESE DOG	FEMALE SPAYED	skin	20	34	30		S	R	S	S		R			R	S	S		R		R	S						Referral				S	R	S	S	S		R			R	S	S		R
072839	2007	CANINE			urine	23	33	31		S	S	S	S		S			S	S	S		S		S	S						Referral				S	S	S	S	S		S			S	S	S		S
070001	2007	CANINE	ENGLISH BULLDOG	MALE CASTRATED	skin	23	33	28		S	R	S	S		R			R	S	S		R		R	R					Neg	Clinical				S	R	S	S	S		R			R	S	S		R
072054	2007	CANINE	MALTESE DOG	FEMALE SPAYED	skin	21	35	30		S	R	S	S		R			R	S	R		R		R	I						Referral				S	R	S	S	S		R			R	S	R		R
070204	2007	CANINE	COCKER SPANIEL	MALE CASTRATED	ear	10	23	17		S	R	S	S		S			S	S	R		R		S	S					mec+, no band*	Clinical				S	R	R	S	S		S			S	S	R		R
070205a	2007	CANINE	COCKER SPANIEL	MALE CASTRATED	ear	26	34	30		S	S	S	S		S			S	S	S		S		S	S					Neg	Clinical				S	S	S	S	S		S			S	S	S		S
070205c	2007	CANINE	COCKER SPANIEL	MALE CASTRATED	ear	14	33	16		S	R	S	S		S			S	S	R		R		S	S					mec+, no band*	Clinical				S	R	R	S	S		S			S	S	R		R
80254	2008	CANINE			ear	17	26	17		S	R	S	S		R		S	S	S	S		R		S	S						Referral				S	R	R	S	S		R		S	S	S	S		R
80336	2008	CANINE	CANINE UNASSIGNED	FEMALE SPAYED	skin	21	35	28		S	R	S	S		S			S	S	S		R		S	S						Clinical				S	R	S	S	S		S			S	S	S		R
80766	2008	CANINE	ENGLISH BULLDOG	MALE CASTRATED	bone	6	22	6		S	R	S	S		R			R	I	R		R		R	R					mec+, Type 5	Clinical				S	R	R	S	S		R			R	R	R		R
80859	2008	CANINE			skin	22	31	27		S	S	S	S		S			S	R	S		S		S	S						Referral				S	S	S	S	S		S			S	R	S		S
090663	2009	CANINE			joint	21	34			S	R	S	S		S			S	S	S		R		S	S						Referral				S	R		S	S		S			S	S	S		R
091542	2009	CANINE			skin	19	35	26		S	R	S	S		S			S	S	S		R		S	S					Neg	Referral				S	R	S	S	S		S			S	S	S		R
074691	2007	CANINE			ear	24	34	26		S	R	S	S		S			S	S	S		R		R	S						Referral				S	R	S	S	S		S			S	S	S		R
093761	2009	CANINE			urine	19	33	29		S	R	S	S		R			R	S	S		R		S	S					Neg	Referral				S	R	S	S	S		R			R	S	S		R
074463	2007	CANINE	LABRADOR RETRIEVER	FEMALE SPAYED	skin	6	26	14		S	R	S	S		R			R	S	R		R		R	R					mec+, Type 5	Referral				S	R	R	S	S		R			R	S	R		R
075224	2007	CANINE	LABRADOR RETRIEVER	FEMALE SPAYED	skin	6	26	6		S	R	S	S		S			S	R	R		R		S	S					mec+, Type 3	Referral				S	R	R	S	S		S			S	R	R		R
84254	2008	CANINE			skin	8	23	15		S	R	S	S		R			R	S	R		R		R	R						Referral				S	R	R	S	S		R			R	S	R		R
84254	2008	CANINE			skin	6	26	6		S	R	S	S		S			S	R	R		R		S	S						Referral				S	R	R	S	S		S			S	R	R		R
073652	2007	CANINE	MIXED BREED DOG	FEMALE SPAYED	ear	22	34	28		S	S	S	S		S			S	S	S		S		S	S						Clinical				S	S	S	S	S		S			S	S	S		S
84980	2008	CANINE			skin	17	33	28		S	R	S	S		R			R	R	S		R		S	R						Referral				S	R	S	S	S		R			R	R	S		R
060196	2006	CANINE			nasal	27	30	27		S	S	S	S		S			S	S	S		S		S	S				0		Referral	No	No		S	S	S	S	S		S			S	S	S		S
093196	2009	CANINE			ear	13	28	21		S	R	S	S		R			R	S	S		R		S	S						Referral				S	R	S	S	S		R			R	S	S		R
090413	2009	CANINE			skin	21	30			S	S	S	S		S			S	S	S		S		S	S						Referral				S	S		S	S		S			S	S	S		S
073034	2007	CANINE			urine	21	37	30		S	R	S	S		R			R	S	S		R		R	S						Referral				S	R	S	S	S		R			R	S	S		R
061517	2006	CANINE	BEAGLE	MALE CASTRATED	joint	26	35	30		S	S	S	S		S			S	S	S		S		S	S				40.24		Clinical	No	No		S	S	S	S	S		S			S	S	S		S
070301	2007	CANINE	GREAT PYRENEES	MALE CASTRATED	skin	>20	>35	>30		S	S	S	S		S			S	S	S		S		S	S						Clinical				S	S	S	S	S		S			S	S	S		S
075121	2007	CANINE	TOY POODLE	FEMALE SPAYED	skin	20	32	28		S	R	S	S		S			S	S	S		R		R	S						Clinical				S	R	S	S	S		S			S	S	S		R
093717	2009	CANINE			urine	19	32	29		S	R	S	S		S			S	S	S		R		S	S					Neg	Referral				S	R	S	S	S		S			S	S	S		R
093877a	2009	CANINE	COCKER SPANIEL	MALE CASTRATED	skin	6	23	8	S	R	R	R	S		R	I		R	I	R	R	R	S	R	R					POS	Clinical			S	R	R	R	R	S		R	R		R	R	R	R	R	S
093877b	2009	CANINE	COCKER SPANIEL	MALE CASTRATED	skin	11	28	16		S	S	S	S		S			S	S	S		S		S	S					POS	Clinical				S	S	R	S	S		S			S	S	S		S
076366	2007	CANINE			skin	20	32	28		S	R	S	S		S			S	S	S		R		R	S						Referral				S	R	S	S	S		S			S	S	S		R
093399	2009	CANINE			skin	20	35	25		S	R	S	S		S			S	S	S		R		S	S						Referral				S	R	S	S	S		S			S	S	S		R
094413	2009	CANINE			skin	12	29	16		S	S	S	S		S			S	I	S		S		S	S					Neg	Referral				S	S	R	S	S		S			S	R	S		S
82369	2008	CANINE			skin	12	26	15		S		S	S		R			R	S	R		R		R	R					mec+, Type 5	Referral				S		R	S	S		R			R	S	R		R
075091	2007	CANINE	SHIH TZU	MALE CASTRATED	ear	23	33	28		S	S	S	S		S			S	S	S		S		S	S						Clinical				S	S	S	S	S		S			S	S	S		S
076387	2007	CANINE	SHIH TZU	MALE CASTRATED	skin	23	33	30		S	S	S	S		S			S	S	S		S		S	S						Clinical				S	S	S	S	S		S			S	S	S		S
83300	2008	CANINE	SHIH TZU	MALE CASTRATED	skin	20	35	28		S	R	S	S		S			S	I	I		R		S	S						Clinical				S	R	S	S	S		S			S	R	R		R
83300	2008	CANINE	SHIH TZU	MALE CASTRATED	skin	25	34	28		S	S	S	S		S			S	S	S		S		S	S						Clinical				S	S	S	S	S		S			S	S	S		S
061513	2006	CANINE			ttw	24	36	32		S	R	S	S		S			S	S	S		R		S	S				0		Referral	No	No		S	R	S	S	S		S			S	S	S		R
091615	2009	CANINE	DALMATIAN	MALE	urine	6	22	6		R	R	R	S		S			S	S	S		R		R	S					POS	Clinical				R	R	R	R	S		S			S	S	S		R
094170	2009	CANINE			skin	13	24	13		S	R	S	S		R			R	I	R		R		R	R					POS	Referral				S	R	R	S	S		R			R	R	R		R
85121	2008	CANINE			ear	22	36	34		S	R	S	S		S			S	S	S		R		R	S						Referral				S	R	S	S	S		S			S	S	S		R
85121	2008	CANINE			ear	18	33	28		S	R	S	S		S			S	S	R		R		R	S						Referral				S	R	S	S	S		S			S	S	R		R
81646	2008	CANINE	MINIATURE SCHNAUZER 20-30LBS	MALE CASTRATED	skin	25	33	28		S	S	S	S		S			S	S	S		S		S	S						Clinical				S	S	S	S	S		S			S	S	S		S
82357	2008	CANINE	SHIH TZU	MALE CASTRATED	ear	11	22	14	S	S		S	S		R	I		R	I	R		R	S	R	R					mec+, Type 5	Clinical			S	S		R	S	S		R	R		R	R	R		R	S
82358	2008	CANINE	SHIH TZU	MALE CASTRATED	ear	6	21	6	S	S		S	S		R	I		R	I	R		R	S	R	R					mec+, Type 5	Clinical			S	S		R	S	S		R	R		R	R	R		R	S
091499	2009	CANINE	SHIH TZU	MALE CASTRATED	ear	6	22	13	R	S	R	S	S		R	I		R	R	R	R	R	S	R	R					POS	Clinical			R	S	R	R	S	S		R	R		R	R	R	R	R	S
063998	2006	CANINE	MIXED BREED DOG	MALE	skin	27	37	30		S	S	S	S		S			S	S	S		S		S	S					0	Referral	No	No		S	S	S	S	S		S			S	S	S		S
070617	2007	CANINE	MIXED BREED DOG	MALE CASTRATED	skin	12	23	13		S	R	S	S		R			R	S	R		R		R	R					mec+, Type 5	Clinical				S	R	R	S	S		R			R	S	R		R
091651	2009	CANINE			urine	21	35	31		S	R	S	S		S			S	S	S		R		R	S					Neg	Referral				S	R	S	S	S		S			S	S	S		R
060305	2006	CANINE	SIBERIAN HUSKY	FEMALE SPAYED	skin	22	35	31		S	R	S	S		S			S	S	S		R		S	S		0.125		40.34		Clinical	No	No		S	R	S	S	S		S			S	S	S		R
094204	2009	CANINE	MIXED BREED DOG	MALE CASTRATED	nasal	15	24	18		S	R	S	S		S			S	S	S		R		R	S						Clinical				S	R	R	S	S		S			S	S	S		R
094204	2009	CANINE	MIXED BREED DOG	MALE CASTRATED	nasal	20	32	29		S	R	S	S		S			S	S	S		R		S	S						Clinical				S	R	S	S	S		S			S	S	S		R
82247	2008	CANINE			ear	20	34	29		S		S	S		S			S	S	S		R		S	S					0, no band	Referral				S		S	S	S		S			S	S	S		R
81672	2008	CANINE			ear	6	20	6		R	R	I	S		S			S	I	S		R		S	S					mec+,	Referral				R	R	R	R	S		S			S	R	S		R
090081	2009	CANINE	MIXED BREED DOG	MALE CASTRATED	bone	6	23		S	R	R	R	R		R	I		R	I	R	S	R	S	R	R					POS	Clinical			S	R	R		R	R		R	R		R	R	R	S	R	S
090198	2009	CANINE	MIXED BREED DOG	MALE CASTRATED	skin	6	22		S	R	R	R	R		R	I		R	S	R	S	R	S	R	R					POS	Clinical			S	R	R		R	R		R	R		R	S	R	S	R	S
090218	2009	CANINE	MIXED BREED DOG	MALE CASTRATED	skin	6	24		S	R	R	R	R		R	I		R	S	R	S	R	S	R	R						Clinical			S	R	R		R	R		R	R		R	S	R	S	R	S
090133	2009	CANINE	MINIATURE DACHSHUND	MALE CASTRATED	skin	24	35			S	R	S	S		S			S	S	S		R		R	S					Neg	Clinical				S	R		S	S		S			S	S	S		R
091690	2009	CANINE	MIXED BREED DOG	MALE CASTRATED	trach/bronch	20	35	24		S	R	S	S		S			S	S	S		R		S	S					Neg	Clinical				S	R	S	S	S		S			S	S	S		R
090293	2009	CANINE			skin	20	35			S	R	S	S		S			S	S	S		R		R	R					Neg	Referral				S	R		S	S		S			S	S	S		R
074072	2007	CANINE	STAFFORDSHIRE TERRIER	MALE	skin	19	34	29		S	R	S	S		S			S	S	S		R		S	S						Clinical				S	R	S	S	S		S			S	S	S		R
81056	2008	CANINE	BOXER	MALE CASTRATED	skin	23	34	28		S	S	S	S		S			S	S	S		S		S	S						Clinical				S	S	S	S	S		S			S	S	S		S
81008	2008	CANINE	MIXED BREED DOG	MALE CASTRATED	skin	21	35	32		S	R	S	S		S			S	S	S		R		S	S						Clinical				S	R	S	S	S		S			S	S	S		R
071092	2007	CANINE	LABRADOR RETRIEVER	MALE CASTRATED	ear	27	36	30		S	S	S	S		S			S	S	S		S		S	S						Referral				S	S	S	S	S		S			S	S	S		S
062451	2006	CANINE			ear	26	35	32		S	S	S	S		S			S	S	S		S		S	S				38.64		Referral	No	No		S	S	S	S	S		S			S	S	S		S
80519	2008	CANINE	SHIH TZU	FEMALE SPAYED	urine	21	37	32		S	R	S	S		S			S	S	S		R		R	S						Referral				S	R	S	S	S		S			S	S	S		R
82769	2008	CANINE			ear	24	33	28		S	S	S	S		S			S	S	S		S		S	S						Referral				S	S	S	S	S		S			S	S	S		S
092527a	2009	CANINE	SHIH TZU	FEMALE SPAYED	skin	23	32	30		S	S	S	S		S			S	S	S		S		S	S					Neg	Clinical				S	S	S	S	S		S			S	S	S		S
092527b	2009	CANINE	SHIH TZU	FEMALE SPAYED	skin	20	35	31		S	R	S	S		R			R	S	S		R		R	I					Neg	Clinical				S	R	S	S	S		R			R	S	S		R
060116	2006	CANINE	SHETLAND SHEEPDOG	FEMALE	bone	21	30	31		S	R	S	S		S			S	S	S		R		S	S		0.25		41.29		Referral	No	No		S	R	S	S	S		S			S	S	S		R
81664	2008	CANINE	GERMAN SHEPHERD DOG	FEMALE SPAYED	skin	20	32	30		S	R	S	S		S			S	S	S		R		S	S						Clinical				S	R	S	S	S		S			S	S	S		R
075027	2007	CANINE	WEIMARANER	MALE CASTRATED	skin	6	22	6		R	R	S	S		R		R	R	I	R		R		R	R					mec+, Type 5	Clinical				R	R	R	S	S		R		R	R	R	R		R
075055	2007	CANINE	WEIMARANER	MALE CASTRATED	skin	6	22	6		S	R	S	S		R			R	I	R		R		R	R					mec+, Type 5	Clinical				S	R	R	S	S		R			R	R	R		R
075169	2007	CANINE	WEIMARANER	MALE CASTRATED	skin	6	22	6		S	R	S	S		R			R	S	R		R		R	R					mec+, Type 5	Clinical				S	R	R	S	S		R			R	S	R		R
075364	2007	CANINE	WEIMARANER	MALE CASTRATED	skin	6	21	6		S	R	S	S		R			R	I	R		R		R	R					mec+, Type 5	Clinical				S	R	R	S	S		R			R	R	R		R
075566	2007	CANINE	WEIMARANER	MALE CASTRATED	skin	6	23	6		S	R	S	S		R			R	S	R		R		R	R					mec+, Type 5	Clinical				S	R	R	S	S		R			R	S	R		R
84366	2008	CANINE		FEMALE SPAYED	skin	24	35	29		S	R	S	S		S			S	S	S		R		R	S						Referral				S	R	S	S	S		S			S	S	S		R
061454	2006	CANINE	MIXED BREED DOG	FEMALE SPAYED	ear	26	36	31		S	R	S	S		S			S	S	S		R		S	S				0		Clinical	No	No		S	R	S	S	S		S			S	S	S		R
81680	2008	CANINE	BEAGLE	FEMALE SPAYED	skin	24	33	28		S	S	S	S		S			S	S	S		S		S	S					0, no band	Clinical				S	S	S	S	S		S			S	S	S		S
071712	2007	CANINE	SAINT BERNARD	MALE CASTRATED	skin	22	34	31		S	R	S	S		S			S	R	S		R		R	S						Clinical				S	R	S	S	S		S			S	R	S		R
072375	2007	CANINE	SHIH TZU	FEMALE SPAYED	skin	21	33	30		S	R	S	S		S			S	S	S		R		S	S						Clinical				S	R	S	S	S		S			S	S	S		R
072375	2007	CANINE	SHIH TZU	FEMALE SPAYED	skin	27	34	32		S	S	S	S		S			S	S	S		S		S	S						Clinical				S	S	S	S	S		S			S	S	S		S
073043	2007	CANINE	YORKSHIRE TERRIER	FEMALE	urine	20	34	28		S	R	S	S		S			S	S	S		R		R	S						Clinical				S	R	S	S	S		S			S	S	S		R
84863	2008	CANINE	SHETLAND SHEEPDOG	MALE CASTRATED	skin	23	32	28		S	S	S	S		S			S	S	S		S		S	S						Referral				S	S	S	S	S		S			S	S	S		S
070818	2007	CANINE	MIXED BREED DOG	MALE CASTRATED	skin	27	32	30		S	S	S	S		S			S	S	S		S		S	S						Clinical				S	S	S	S	S		S			S	S	S		S
071670	2007	CANINE	GREYHOUND	MALE CASTRATED	skin	21	33	29		S	R	S	S		S			S	S	S		R		R	S						Clinical				S	R	S	S	S		S			S	S	S		R
063787	2006	CANINE	SCOTTISH TERRIER	MALE CASTRATED	urine	12	23	12		S	R	S	S		R			R	I	R		R		R	R		>256			Type 5	Clinical	No	No		S	R	R	S	S		R			R	R	R		R
064132	2006	CANINE	SCOTTISH TERRIER	MALE CASTRATED	urine	6	23	12		S	R	S	S		R			R	S	R		R		R	R		>256			Type 5	Clinical	No	No		S	R	R	S	S		R			R	S	R		R
070704	2007	CANINE	MINIATURE SCHNAUZER 20-30LBS	FEMALE SPAYED	vaginal	25	38	33		S	R	S	S		S			S	S	S		R		R	S						Clinical				S	R	S	S	S		S			S	S	S		R
062587a	2006	CANINE	GERMAN SHEPHERD DOG	MALE	skin	18	30	23		S	R	S	S		S			S	S	R		R		S	S		0.75		POS	0	Clinical	No	No		S	R	S	S	S		S			S	S	R		R
062587b	2006	CANINE	GERMAN SHEPHERD DOG	MALE	skin	6	23	6		S	R	S	S		S			S	S	S		R		S	S				26.6	Type 3	Clinical	No	No		S	R	R	S	S		S			S	S	S		R
82149	2008	CANINE			skin	6	19	6	S	R		S	S		R	I		R	R	R		R	S	R	R					mec+, Type 5	Referral			S	R		R	S	S		R	R		R	R	R		R	S
82119	2008	CANINE	PUG	FEMALE SPAYED	ear	9	26	13		S		S	S		S			S	R	R		R		S	S					mec+, no band	Clinical				S		R	S	S		S			S	R	R		R
81431	2008	CANINE			urine	23	32	30		S	S	S	S		S			S	R	S		S		S	S						Referral				S	S	S	S	S		S			S	R	S		S
81722	2008	CANINE			urine	19	33	30		S	R	S	S		S			S	S	S		R		S	S						Referral				S	R	S	S	S		S			S	S	S		R
093812	2009	CANINE	LABRADOR RETRIEVER	FEMALE SPAYED	skin	20	35	25		S	S	S	S		S			S	S	S		S		R	R					Neg	Clinical				S	S	S	S	S		S			S	S	S		S
060438	2006	CANINE			urine	6	23	6		S	R	S	S		R			R	S	R		R		R	R		>256		28.74	Type 5 (314 bp)	Referral	No	No		S	R	R	S	S		R			R	S	R		R
060770	2006	CANINE			urine	6	24	6		S	R	S	S		R			R	S	R		R		R	R				26.25	Type 5 (376 bp)	Referral	No	No		S	R	R	S	S		R			R	S	R		R
063899	2006	CANINE			nasal	22	33	30		S	R	S	S		S			S	S	S		R		S	S					0	Referral	No	No		S	R	S	S	S		S			S	S	S		R
092774	2009	CANINE			skin	17	33	30		S	R	S	S	S	S			S	S			R		R	S					Neg	Referral				S	R	S	S	S	S	S			S	S			R
092351	2009	CANINE		FEMALE SPAYED	urine	19	31	26		S	R	S	S		S			S	R	S		R		R	I						Referral				S	R	S	S	S		S			S	R	S		R
094551	2009	CANINE	AUSTRALIAN CATTLE DOG	MALE	skin	18	33	28		S	R	S	S		S			S	S	S		R		S	S						Clinical				S	R	S	S	S		S			S	S	S		R
064799	2006	CANINE	GOLDEN RETRIEVER	FEMALE SPAYED	ear	26	32	32		S	S	S	S		S			S	S	S		S		S	S					0	Referral	No	No		S	S	S	S	S		S			S	S	S		S
073638a	2007	CANINE	MASTIFF	FEMALE SPAYED	skin	26	32	29		S	S	S	S		S			S	S	S		S		S	S						Clinical				S	S	S	S	S		S			S	S	S		S
073638b	2007	CANINE	MASTIFF	FEMALE SPAYED	skin	21	34	30		S	R	S	S		S			S	S	S		R		S	S						Clinical				S	R	S	S	S		S			S	S	S		R
061006	2006	CANINE	LHASA APSO	FEMALE	ear	26	34	32		S	R	S	S		S			S	S	S		R		S	S				0		Referral	No	No		S	R	S	S	S		S			S	S	S		R
81097	2008	CANINE		FEMALE SPAYED	skin	25	34	32		S	S	S	S		S			S	S	S		S		S	S						Referral				S	S	S	S	S		S			S	S	S		S
092586	2009	CANINE	CHIHUAHUA	FEMALE SPAYED	bone	6	21	6	S	S	R	S	S		R	I	R	R	I	R	R	R	S	R	R					POS	Clinical			S	S	R	R	S	S		R	R	R	R	R	R	R	R	S
060689b	2006	CANINE	IRISH WOLFHOUND	FEMALE SPAYED	milk	27	38	35		S	R	S	S		R			R	S	S		R		S	S				37.61		Clinical	No	No		S	R	S	S	S		R			R	S	S		R
060689c	2006	CANINE	IRISH WOLFHOUND	FEMALE SPAYED	milk	24	37	33		S	R	S	R		R			R	S	S		R		S	I		0.25		0		Clinical	No	No		S	R	S	S	R		R			R	S	S		R
094460	2009	CANINE	COCKER SPANIEL	FEMALE SPAYED	ear	24	31	28		S	S	S	S		S			S	S	R		S		S	S						Referral				S	S	S	S	S		S			S	S	R		S
83474	2008	CANINE	MIXED BREED DOG	MALE CASTRATED	joint	21	32	29		S	R	S	S		S			S	S	S		R		S	S						Clinical				S	R	S	S	S		S			S	S	S		R
075041	2007	CANINE	MIXED BREED DOG	FEMALE SPAYED	skin	9	22	10		S	R	S	S		R			R	I	R		R		R	R						Clinical				S	R	R	S	S		R			R	R	R		R
85616	2008	CANINE			skin	6	17		S	R	R	R	R		R	I		R	I	R	S	R	S	R	R						Referral			S	R	R		R	R		R	R		R	R	R	S	R	S
85621	2008	CANINE	PUG	MALE	skin	6	24	14	S	S	R	S	S		R	I		R	S	R	I	R	S	R	R						Clinical			S	S	R	R	S	S		R	R		R	S	R	R	R	S
072045	2007	CANINE			skin	26	34	32		S	S	S	S		S			S	S	S		S		S	S						Referral				S	S	S	S	S		S			S	S	S		S
063725	2006	CANINE	MIXED BREED DOG	FEMALE SPAYED	skin	9	23	10		S	R	S	S		R			R	I	R		R		R	R		>256			Type 5	Clinical	No	No		S	R	R	S	S		R			R	R	R		R
060790	2006	CANINE	MINIATURE PINSCHER	MALE CASTRATED	skin	28	38	34		S	R	S	S		S			S	S	S		R		S	S				0		Referral	No	No		S	R	S	S	S		S			S	S	S		R
060935	2006	CANINE	COCKER SPANIEL	MALE CASTRATED	eye	23	35	30		S	R	S	S		S			S	S	S		R		R	S				0		Clinical	No	No		S	R	S	S	S		S			S	S	S		R
060949	2006	CANINE	COCKER SPANIEL	MALE CASTRATED	eye	23	36	32		S	R	S	S		S			S	S	S		R		R	S				0		Clinical	No	No		S	R	S	S	S		S			S	S	S		R
073613	2007	CANINE	SCOTTISH TERRIER	MALE CASTRATED	skin	19	32	28		S	R	S	S		S			S	R	S		R		S	S						Clinical				S	R	S	S	S		S			S	R	S		R
075290	2007	CANINE	SCOTTISH TERRIER	MALE CASTRATED	skin	21	34	29		S	R	S	S		R			R	I	S		R		R	R						Clinical				S	R	S	S	S		R			R	R	S		R
093825	2009	CANINE		MALE CASTRATED	ear	17	34	32		S	R	S	S	S	R			R	S	S		R	S	R	I	=0.25				Neg	Referral				S	R	S	S	S	S	R			R	S	S		R	S
094169	2009	CANINE	GREAT DANE	MALE	skin	12	24	14	S	S	R	S	S		R	I		R	I	R	R	R	S	R	R					POS	Clinical			S	S	R	R	S	S		R	R		R	R	R	R	R	S
82370	2008	CANINE			skin	21	33	29		S		S	S		R			R	R	S		R		R	R					0, no band	Referral				S		S	S	S		R			R	R	S		R
060424	2006	CANINE			urine	27	39	32		S	S	S	S		S			S	S	S		S		S	S				0		Referral	No	No		S	S	S	S	S		S			S	S	S		S
81260	2008	CANINE			skin	21	35	30		S	R	S	S		S			S	S	S		R		R	S						Referral				S	R	S	S	S		S			S	S	S		R
82934	2008	CANINE			skin	25	34	30		S	S	S	S		S			S	S	S		S		S	S					0,	Referral				S	S	S	S	S		S			S	S	S		S
092117	2009	CANINE			urine	23	33	30		S	S	S	S		S			S	S	S		S		S	S						Referral				S	S	S	S	S		S			S	S	S		S
81334	2008	CANINE			skin	21	34	29		S	R	S	S		S			S	S	S		R		S	S						Referral				S	R	S	S	S		S			S	S	S		R
065007	2006	CANINE	BOXER	FEMALE SPAYED	joint	6	24	6		S	R	S	S		S			S	I	S		R		S	S					Type 3	Referral	No	No		S	R	R	S	S		S			S	R	S		R
80090	2008	CANINE	BOXER	FEMALE SPAYED	bone	6	20	6		S	R	S	S		S			S	R	S		R		S	S					mec+, Type 3	Referral				S	R	R	S	S		S			S	R	S		R
091334	2009	CANINE	MINIATURE SCHNAUZER 20-30LBS	FEMALE SPAYED	skin	20	34	30		S	R	S	S		S			S	S	S		R		R	R					Neg	Clinical				S	R	S	S	S		S			S	S	S		R
091335	2009	CANINE	MINIATURE SCHNAUZER 20-30LBS	FEMALE SPAYED	skin	6	23	9	S	R	R	S	S		R	I		R	I	R	I	R	S	R	R					POS	Clinical			S	R	R	R	S	S		R	R		R	R	R	R	R	S
064566	2006	CANINE	GREAT DANE	MALE CASTRATED	LN	19	28	23		S	R	S	S		S			S	S	S		R		S	S				Neg		Referral	No	No		S	R	S	S	S		S			S	S	S		R
85799	2008	CANINE			skin	20	33			S	R	S	S		S			S	S	S		R		R	S						Referral				S	R		S	S		S			S	S	S		R
83899	2008	CANINE			ear	17	32	27		S	R	S	S		S			S	S	S		R		S	I						Referral				S	R	S	S	S		S			S	S	S		R
061712	2006	CANINE	SHIH TZU	MALE CASTRATED	skin	21	34	30		S	R	S	S		S			S	S	S		R		R	S		0.25		0		Clinical	No	No		S	R	S	S	S		S			S	S	S		R
82299	2008	CANINE	YORKSHIRE TERRIER	MALE	skin	23	32	30		S		S	S		S			S	S	S		S		S	S						Clinical				S		S	S	S		S			S	S	S		S
076236	2007	CANINE			urine	24	33	30		S	S	S	S		S			S	S	S		S		S	S						Referral				S	S	S	S	S		S			S	S	S		S
090656	2009	CANINE			skin	6	24			S	R	S	S		S			S	S	R		R		S	S					POS	Referral				S	R		S	S		S			S	S	R		R
064259	2006	CANINE			ear	20	35	32		S	R	S	S		S			S	S	S		R		S	S		0.25			0	Referral	No	No		S	R	S	S	S		S			S	S	S		R
072021	2007	CANINE	BORDER COLLIE	FEMALE SPAYED	skin	21	32	28		S	R	S	S		R			R	S	S		R		R	S						Clinical				S	R	S	S	S		R			R	S	S		R
072032	2007	CANINE	BORDER COLLIE	FEMALE SPAYED	skin	22	33	30		S	R	S	S		R			R	S	S		R		R	S						Clinical				S	R	S	S	S		R			R	S	S		R
072286	2007	CANINE	BORDER COLLIE	FEMALE SPAYED	skin	6	22	6		S	R	S	S		R			R		R		R		R	R					mec+, Type 5	Clinical				S	R	R	S	S		R			R		R		R
072550	2007	CANINE	BORDER COLLIE	FEMALE SPAYED	skin	20	33	29		S	R	S	S		R			R	S	S		R		R	S						Clinical				S	R	S	S	S		R			R	S	S		R
072970	2007	CANINE	BORDER COLLIE	FEMALE SPAYED	skin	12	23	13		S	R	S	R		R			R	R	R		R		R	R					mec+, Type 5	Clinical				S	R	R	S	R		R			R	R	R		R
072971	2007	CANINE	BORDER COLLIE	FEMALE SPAYED	skin	11	22	12		S	R	S	R		R			R	R	R		R		R	R					mec+, Type 5	Clinical				S	R	R	S	R		R			R	R	R		R
065721	2006	CANINE	YORKSHIRE TERRIER	MALE CASTRATED	eye	27	37	33		S	R	S	S	S	S			S	S	S		R		S	S					0	Clinical	No	No		S	R	S	S	S	S	S			S	S	S		R
064883b	2006	CANINE			skin	19	28	24		S	R	S	S		S			S	S	S		R		S	S				Neg		Referral	No	No		S	R	S	S	S		S			S	S	S		R
064883d	2006	CANINE			skin	24	37	32		S	R	S	S		S			S	S	S		R		R	S					0	Referral	No	No		S	R	S	S	S		S			S	S	S		R
093655	2009	CANINE	BULL TERRIER	MALE CASTRATED	skin	21	32	28		S	S	S	S		S			S	S	S		S		S	S						Referral				S	S	S	S	S		S			S	S	S		S
063430	2006	CANINE	TOY POODLE	FEMALE	urine	25	36	34		S	R	S	S		S			S	S	S		R		R	S					0	Clinical	No	No		S	R	S	S	S		S			S	S	S		R
81445	2008	CANINE	DACHSHUND	FEMALE SPAYED	skin	21	34	29		S	R	S	S		S			S	S	S		R		R	S						Clinical				S	R	S	S	S		S			S	S	S		R
83163	2008	CANINE	DACHSHUND	FEMALE SPAYED	skin	6	19	6	S	R	R	R	S		R	R		R	S	R	I	R	S	R	R						Clinical			S	R	R	R	R	S		R	R		R	S	R	R	R	S
092281	2009	CANINE	LABRADOR RETRIEVER	FEMALE SPAYED	skin	19	35	30		S	R	S	S		S			S	S	S		R		S	S						Clinical				S	R	S	S	S		S			S	S	S		R
064687	2006	CANINE	MINIATURE SCHNAUZER 20-30LBS	FEMALE SPAYED	urine	25	33	31		S	R	S	S		S			S	S	S		R		S	I					0	Clinical	No	No		S	R	S	S	S		S			S	S	S		R
092951	2009	CANINE	YORKSHIRE TERRIER	MALE CASTRATED	nasal	17 (20)	33	28		S	R	S	S		S			S	S	S		R		S	S						Clinical				S	R	S	S	S		S			S	S	S		R
064034	2006	CANINE	GERMAN SHEPHERD DOG	MALE CASTRATED	skin	25	38	33		S	R	S	S		S			S	R	S		R		S	R					0	Clinical	No	No		S	R	S	S	S		S			S	R	S		R
071779	2007	CANINE			skin	26	39	36		S	R	S	S		R			R	R	R		R		R	R						Referral				S	R	S	S	S		R			R	R	R		R
093941	2009	CANINE			skin	17	33	29		S	R	S	S	S	S			S	S	S		R	S	S	S	=0.25				Neg	Referral				S	R	S	S	S	S	S			S	S	S		R	S
83286	2008	CANINE	AFGHAN HOUND	FEMALE SPAYED	skin	26	37	33		S	S	S	S		S			S	S	S		S		S	S						Clinical				S	S	S	S	S		S			S	S	S		S
090914	2009	CANINE	AFGHAN HOUND	FEMALE SPAYED	skin	22	38	34		S	S	S	S		S			S	S	S		S		S	S						Clinical				S	S	S	S	S		S			S	S	S		S
83419	2008	CANINE			skin	21	32	30		S	R	S	S		S			S	S	S		R		S	S						Referral				S	R	S	S	S		S			S	S	S		R
064948	2006	CANINE			ear	24	35	31		S	R	S	S		S			S	S	S		R		S	S					0	Referral	No	No		S	R	S	S	S		S			S	S	S		R
072497	2007	CANINE			skin	22	33	30		S	R	S	S		S			S	S	S		R		R	I						Referral				S	R	S	S	S		S			S	S	S		R
063118	2006	CANINE	PUG	MALE CASTRATED	ttw	8	22	11		S	R	S	S		R			R	S	R		R		R	R		>256		29.99	Type 5 (310 bp)	Clinical	No	No		S	R	R	S	S		R			R	S	R		R
074544	2007	CANINE			skin	21	34	30		S	R	S	S		S			S	S	S		R		S	S						Referral				S	R	S	S	S		S			S	S	S		R
075702	2007	CANINE			urine	23	36	30		S	R	S	S		R			R	S	S		R		R	S						Referral				S	R	S	S	S		R			R	S	S		R
83079	2008	CANINE	SHIH TZU	MALE CASTRATED	skin	21	32	29		S	R	S	S		R			R	I	S		R		R	R					0,	Clinical				S	R	S	S	S		R			R	R	S		R
83548	2008	CANINE	BOXER	MALE	skin	19	32	29		S	R	S	S		S			S	S	S		R		S	S						Clinical				S	R	S	S	S		S			S	S	S		R
84892	2008	CANINE			skin	6	28	9		S	R	S	S		S			S	S	R		R		S	S						Referral				S	R	R	S	S		S			S	S	R		R
84928	2008	CANINE	SHIH TZU	MALE CASTRATED	skin	20	34	30		S	R	S	S		I			R	S	S		R		R	S						Clinical				S	R	S	S	S		R			R	S	S		R
85256	2008	CANINE	SHIH TZU	MALE CASTRATED	skin	6	19	6	S	R		R	S		S			S	R	R		R		S	S						Clinical			S	R		R	R	S		S			S	R	R		R
85783	2008	CANINE	SHIH TZU	MALE CASTRATED	skin	6	19		S	R	R	R	S		R	I		R	S	R	I	R	S	R	R						Clinical			S	R	R		R	S		R	R		R	S	R	R	R	S
093552	2009	CANINE	DOBERMAN PINSCHER	FEMALE SPAYED	skin	6	24	6		S	R	S	S		S			S	S	S		R		R	S					POS	Clinical				S	R	R	S	S		S			S	S	S		R
094043	2009	CANINE			skin	17	31	28		S	R	S	S	R	S			S	R	R		R	S	R	S	=0.25				Neg	Referral				S	R	S	S	S	R	S			S	R	R		R	S
094268	2009	CANINE	MINIATURE POODLE	MALE CASTRATED	skin	18	33	29		S	R	S	S		R			R	S	S		R		S	I						Clinical				S	R	S	S	S		R			R	S	S		R
094455	2009	CANINE	AUSTRALIAN TERRIER	FEMALE SPAYED	skin	21	34	29		S	R	S	S		S			S	S	S		R		S	S						Clinical				S	R	S	S	S		S			S	S	S		R
80374	2008	CANINE			ear	20	30	28		S	R	S	S		S			S	R	R		R		S	S						Referral				S	R	S	S	S		S			S	R	R		R
85066	2008	CANINE			skin	21	33	30		S	S	S	S		S			S	S	R		S		S	S						Referral				S	S	S	S	S		S			S	S	R		S
83487	2008	CANINE	PEKINGESE	MALE CASTRATED	eye	18				S	R	S	S	S	S			S	S	S		R		R	S						Clinical				S	R		S	S	S	S			S	S	S		R
85224	2008	CANINE	BOSTON TERRIER	MALE	semen	23	34	30		S	R	S	S		S			S	S	S		R		S	S						Clinical				S	R	S	S	S		S			S	S	S		R
091288	2009	CANINE	COCKER SPANIEL	MALE CASTRATED	ear	21	34	32		S	S	S	S		S			S	S	S		S		S	S					Neg	Referral				S	S	S	S	S		S			S	S	S		S
093763	2009	CANINE	ENGLISH STAFFORDSHIRE TERRIER	MALE CASTRATED	skin	20	33	29		S	S	S	S		S			S	S	S		S		S	I					Neg	Clinical				S	S	S	S	S		S			S	S	S		S
092528	2009	CANINE	TOY POODLE	FEMALE SPAYED	skin	10	27	14	S	S	R	S	S		R	I		R	I	R	I	R	S	R	R					POS	Clinical			S	S	R	R	S	S		R	R		R	R	R	R	R	S
064623	2006	CANINE	ENGLISH SPRINGER SPANIEL	MALE CASTRATED	bone	24	36	32		S	R	S	S		S			S	S	S		R		S	S					0	Referral	No	No		S	R	S	S	S		S			S	S	S		R
070836	2007	CANINE	ENGLISH SPRINGER SPANIEL	MALE CASTRATED	skin	6	24	11		S	R	S	S		R			R	S	R		R		R	R					mec+, Type 5	Referral				S	R	R	S	S		R			R	S	R		R
071552	2007	CANINE	ENGLISH SPRINGER SPANIEL	MALE CASTRATED	bone	6	24	9		S	R	S	S		R			R	S	R		R		R	R					mec+, Type 5	Referral				S	R	R	S	S		R			R	S	R		R
072382	2007	CANINE	ENGLISH SPRINGER SPANIEL	MALE CASTRATED	skin	6	21	6		S	R	S	S		R			R	I	R		R		R	R					mec+, Type 5	Referral				S	R	R	S	S		R			R	R	R		R
85230	2008	CANINE			skin	19	35	30		S	R	S	S		R			R	S	R		R		R	R						Referral				S	R	S	S	S		R			R	S	R		R
83731	2008	CANINE			skin	6	24	9		S	R	S	S		R			R	I	R		R		R	R						Referral				S	R	R	S	S		R			R	R	R		R
85740	2008	CANINE			skin	9	24			S	R	S	S		R			R	S	R		R		R	R						Referral				S	R		S	S		R			R	S	R		R
85668	2008	CANINE			skin	20	32			S	S	S	S		S			S	S	S		S		S	S						Referral				S	S		S	S		S			S	S	S		S
094230	2009	CANINE	MIXED BREED DOG	MALE CASTRATED	nasal	6	23	14	S	S	R	S	S		R	S		R	S	R	S	R	S	R	R					Neg	Clinical			S	S	R	R	S	S		R	S		R	S	R	S	R	S
075654	2007	CANINE	MIXED BREED DOG	MALE CASTRATED	skin	20	33	29		S	R	S	S		S			S	S	S		R		R	S						Referral				S	R	S	S	S		S			S	S	S		R
093896	2009	CANINE	MIXED BREED DOG	FEMALE SPAYED	skin	6	22	8	S	S	R	S	S		R	S	R	R	I	R	S	R	S	S	R					POS	Clinical			S	S	R	R	S	S		R	S	R	R	R	R	S	R	S
062550	2006	CANINE	DOBERMAN PINSCHER	MALE CASTRATED	skin	24	28	25		S	R	S	S		R			R	S	S		R		S	S				n/a		Referral	No	No		S	R	S	S	S		R			R	S	S		R
062550	2006	CANINE	DOBERMAN PINSCHER	MALE CASTRATED	skin	22	34	29		S	R	S	S		S			S	S	S		R		S	I				n/a		Referral	No	No		S	R	S	S	S		S			S	S	S		R
094622	2009	CANINE			skin	22	34	30		S	R	S	S		S			S	S	S		R		S	S						Referral				S	R	S	S	S		S			S	S	S		R
82738	2008	CANINE	AUSTRALIAN CATTLE DOG	FEMALE SPAYED	skin	25	32	30		S	S	S	S		S			S	S	S		S		S	S					0, no band	Clinical				S	S	S	S	S		S			S	S	S		S
85704	2008	CANINE	LABRADOR RETRIEVER	FEMALE SPAYED	skin	9	24		S	S	R	S	S		R	I		R	S	R	I	R	S	R	R						Clinical			S	S	R		S	S		R	R		R	S	R	R	R	S
82124	2008	CANINE	LABRADOR RETRIEVER	MALE CASTRATED	skin	20	34	30		S		S	S		S			S	S	S		R		S	S					0, no band	Clinical				S		S	S	S		S			S	S	S		R
073978	2007	CANINE			skin	23	34	30		S	R	S	S		S			S	S	S		R		R	S						Referral				S	R	S	S	S		S			S	S	S		R
84443	2008	CANINE	MIXED BREED DOG	MALE CASTRATED	skin	19				S	R	S	S					S	S	S		R		R	S						Clinical				S	R		S	S					S	S	S		R
070792	2007	CANINE	SHIH TZU	FEMALE SPAYED	urine	25	37	35		S	R	S	S		S			S	I	S		R		R	R						Clinical				S	R	S	S	S		S			S	R	S		R
072657	2007	CANINE	SHIH TZU	FEMALE SPAYED	urine	23	37	35		S	R	S	S		S			S	I	S		R		R	R						Clinical				S	R	S	S	S		S			S	R	S		R
073347	2007	CANINE	SHIH TZU	FEMALE SPAYED	urine	22	32	27		S	R	S	S		S			S	I	S		R		R	R						Clinical				S	R	S	S	S		S			S	R	S		R
063752	2006	CANINE	PEKINGESE	FEMALE SPAYED	urine	26	36	31		S	S	S	S		S			S	S	S		S		S	S					0	Clinical	No	No		S	S	S	S	S		S			S	S	S		S
074362	2007	CANINE	PEKINGESE	FEMALE SPAYED	urine	24	35	30		S	S	S	S		S			S	S	S		S		S	S						Clinical				S	S	S	S	S		S			S	S	S		S
060418	2006	CANINE	MIXED BREED DOG	FEMALE SPAYED	skin	23	36	30		S	R	S	S		S			S	S	S		R		S	S				0		Referral	No	No		S	R	S	S	S		S			S	S	S		R
072384	2007	CANINE	MIXED BREED DOG	FEMALE SPAYED	skin	21	35	30		S	R	S	S		S			S	S	S		R		S	S						Clinical				S	R	S	S	S		S			S	S	S		R
094099	2009	CANINE			skin	9	24	13		S	R	S	S		R			R	R	R		R		R	R					POS	Referral				S	R	R	S	S		R			R	R	R		R
064638	2006	CANINE	ROTTWEILER	MALE	urine	15	30	21		S	R	S	S		S			S	S	S		R		S	S		1.5		POS	0	Referral	No	No		S	R	S	S	S		S			S	S	S		R
064639	2006	CANINE	ROTTWEILER	MALE	skin	15	30	21		S	R	S	S		R			R	S	R		R		R	R		1.5		POS	0	Referral	No	No		S	R	S	S	S		R			R	S	R		R
062092a	2006	CANINE	MIXED BREED DOG	MALE CASTRATED	bone	21	28	24		S	R	S	S		R			R	S	S		R		S	S				36		Clinical	No	No		S	R	S	S	S		R			R	S	S		R
062092b	2006	CANINE	MIXED BREED DOG	MALE CASTRATED	bone	19	27	19		S	R	S	S		S			S	S	S		R		S	S				37		Clinical	No	No		S	R	R	S	S		S			S	S	S		R
075606	2007	CANINE	MINIATURE SCHNAUZER 20-30LBS	FEMALE SPAYED	urine	21	34	31		S	R	S	S		S			S	S	S		R		S	S						Referral				S	R	S	S	S		S			S	S	S		R
090247	2009	CANINE			skin	21	35			S	R	S	S		S			S	S	S		R		R	S					Neg	Referral				S	R		S	S		S			S	S	S		R
092882	2009	CANINE			ear	21	33	30		S	S	S	S		S			S	S	S		S		S	S						Referral				S	S	S	S	S		S			S	S	S		S
83816	2008	CANINE			nasal	15	25	20		S	R	S	S		S			S	S			R		S	S						Referral				S	R	R	S	S		S			S	S			R
092172	2009	CANINE	LABRADOR RETRIEVER	MALE CASTRATED	urine	23	34	29		S	S	S	S		S			S	S	S		S		S	S						Clinical				S	S	S	S	S		S			S	S	S		S
092872	2009	CANINE	MIXED BREED DOG	MALE CASTRATED	skin	6	23	14		S	R	S	S		R			R	S	S		R		S	S					POS	Clinical				S	R	R	S	S		R			R	S	S		R
093352	2009	CANINE	MIXED BREED DOG	MALE CASTRATED	skin	11	26	18	S	S	R	S	S		R	S		R	S	S	S	R	S	S	S					POS	Clinical			S	S	R	R	S	S		R	S		R	S	S	S	R	S
093727	2009	CANINE	MIXED BREED DOG	MALE CASTRATED	skin	12	26	19	S	S	R	S	S		R	I		R	S	S	I	R	S	R	S					POS	Clinical			S	S	R	R	S	S		R	R		R	S	S	R	R	S
094664	2009	CANINE			urine	18	34	26		S	S	S	S		S			S	S	S		S		S	S						Referral				S	S	S	S	S		S			S	S	S		S
82668	2008	CANINE			skin	25	33	32		S	S	S	S		S			S	S	S		S		S	S					0, no band	Referral				S	S	S	S	S		S			S	S	S		S
090585	2009	CANINE			skin	19				S	R	S	S		S			S	S	S		R		R	S						Referral				S	R		S	S		S			S	S	S		R
074004	2007	CANINE			ear	23	34	32		S	R	S	S		S			S	S	S		R		R	S						Referral				S	R	S	S	S		S			S	S	S		R
071405	2007	CANINE			urine	22	36	31		S	R	S	S		S			S	S	S		R		S	S						Referral				S	R	S	S	S		S			S	S	S		R
074315	2007	CANINE	GOLDEN RETRIEVER		skin	22	33	26		S	R	S	S		S			S	S	S		R		R	S						Referral				S	R	S	S	S		S			S	S	S		R
074316	2007	CANINE	GOLDEN RETRIEVER		skin	22	36	33		S	R	S	S		S			S	S	S		R		R	S						Referral				S	R	S	S	S		S			S	S	S		R
060542	2006	CANINE			urine	13	23	14		S	R	S	S		R			R	S	R		R		R	R		>256		38.78	Type 5 (PCR)	Referral	No	No		S	R	R	S	S		R			R	S	R		R
80946	2008	CANINE	ENGLISH BULLDOG	MALE	skin	20	35	30		S	R	S	S		S			S	S	S		R		R	S						Referral				S	R	S	S	S		S			S	S	S		R
82915	2008	CANINE			urine	6	22	6		R	R	S	S		R			R	S	R		R		R	R					mec+,	Referral				R	R	R	S	S		R			R	S	R		R
82359	2008	CANINE	MIXED BREED DOG	FEMALE SPAYED	skin	6	21	6	S	I		S	S		R	I		R	I	R		R	S	R	R					mec+, Type 5	Clinical			S	R		R	S	S		R	R		R	R	R		R	S
82785	2008	CANINE	MIXED BREED DOG	FEMALE SPAYED	skin	6	21	6		R	R	S	S		R			R	S	R		R		R	R					0, no band	Clinical				R	R	R	S	S		R			R	S	R		R
074446	2007	CANINE	SHETLAND SHEEPDOG	FEMALE SPAYED	urine	21	32	26		S	R	S	S		S			S	S	S		R		R	S						Clinical				S	R	S	S	S		S			S	S	S		R
093295	2009	CANINE			skin	6	21	6		S	R	S	S		R			R	I	R		R		R	R					POS	Referral				S	R	R	S	S		R			R	R	R		R
065131	2006	CANINE	GERMAN SHEPHERD DOG	FEMALE SPAYED	blood	17	27	26		S	R	S	S		S			S	S	S		R		S	S				Neg		Clinical	No	No		S	R	S	S	S		S			S	S	S		R
81042	2008	CANINE	GERMAN SHEPHERD DOG	FEMALE SPAYED	skin	6	22	6		S	R	S	S		R			R	R	R		R		R	R					mec+, Type 5	Clinical				S	R	R	S	S		R			R	R	R		R
81043a	2008	CANINE	GERMAN SHEPHERD DOG	FEMALE SPAYED	nasal/axilla	12	25	15		S	R	S	S		R			R	I	R		R		R	R					mec+,	Clinical				S	R	R	S	S		R			R	R	R		R
81043c	2008	CANINE	GERMAN SHEPHERD DOG	FEMALE SPAYED	nasal/axilla	6	22	6		S	R	S	S		R			R	I	R		R		R	R					mec+, Type 5	Clinical				S	R	R	S	S		R			R	R	R		R
072768	2007	CANINE	COCKER SPANIEL	MALE	ear	23	34	28		S	S	S	S		S			S	R	S		S		S	S						Clinical				S	S	S	S	S		S			S	R	S		S
060702	2006	CANINE	COCKER SPANIEL	MALE	ear	25	32	28		S	S	S	S		S			S	S	S		S		S	S				41.89	All repeated mecA results are neg	Referral	No	No		S	S	S	S	S		S			S	S	S		S
076120	2007	CANINE	MIXED BREED DOG	FEMALE SPAYED	skin	21	34	30		S	R	S	S		S		S	S	S			R		S	S						Clinical				S	R	S	S	S		S		S	S	S			R
075475	2007	CANINE	SHIH TZU		skin	22	35	30		S	R	S	S		R			R	S	S		R		R	S						Referral				S	R	S	S	S		R			R	S	S		R
093233a	2009	CANINE			skin	6	20	10		S	R	S	S		R			R	I	R		R		R	R					POS	Referral				S	R	R	S	S		R			R	R	R		R
092884	2009	CANINE			skin	18	34	30		S	R	S	S		R			R	S	S		R		R	S						Referral				S	R	S	S	S		R			R	S	S		R
094343	2009	CANINE	AUSTRALIAN SHEPHERD	FEMALE SPAYED	skin	6	18	6		R	R	R	S		R			R	I	R		R		R	R					POS	Clinical				R	R	R	R	S		R			R	R	R		R
80786	2008	CANINE	MASTIFF	MALE	skin	23	32	28		S	R	S	S		S			S	S	S		R		S	S						Clinical				S	R	S	S	S		S			S	S	S		R
073278	2007	CANINE	DACHSHUND	FEMALE SPAYED	skin	25	34	30		S	S	S	S		S			S	S	S		S		S	S						Clinical				S	S	S	S	S		S			S	S	S		S
075496	2007	CANINE	GOLDEN RETRIEVER	MALE CASTRATED	skin	25	32	27		S	S	S	S		S			S	S	S		S		S	S						Clinical				S	S	S	S	S		S			S	S	S		S
072305	2007	CANINE	WEIMARANER	FEMALE SPAYED	skin	19	23	22		S	R	S	S		S		S	S	S	S		R		S	S						Clinical				S	R	S	S	S		S		S	S	S	S		R
80281	2008	CANINE	BICHON FRISE	FEMALE SPAYED	ear	14	28	16		S	S	S	S		S			S	S	S		S		S	S					mec+, Type 4a	Clinical				S	S	R	S	S		S			S	S	S		S
80282	2008	CANINE	BICHON FRISE	FEMALE SPAYED	ear	14	28	15		S	S	S	S		S			S	S	S		S		S	S					mec+, Type 4a	Clinical				S	S	R	S	S		S			S	S	S		S
80098	2008	CANINE			ear	26	34	30		S	S	S	S		S			S	S			S		S	S						Referral				S	S	S	S	S		S			S	S			S
81937	2008	CANINE			skin	24	34	30		S	S	S	S		S			S	S	S		S		S	S					0, no band	Referral				S	S	S	S	S		S			S	S	S		S
092113	2009	CANINE			skin	18	32	27		S	R	S	S		S			S	S	S		R		S	I						Referral				S	R	S	S	S		S			S	S	S		R
85266a	2008	CANINE			ear	18	33	29	S	S		S	S		S			S	S	S		R		R	I						Referral			S	S		S	S	S		S			S	S	S		R
85266b	2008	CANINE			ear	18	34	29	S	S		S	S		S			S	S	S		R		R	S						Referral			S	S		S	S	S		S			S	S	S		R
075132	2007	CANINE			ear	23	34	30		S	S	S	S		S			S	S	S		S		S	S						Referral				S	S	S	S	S		S			S	S	S		S
074946	2007	CANINE			skin	6	21	6		R	R	S	S		R			R	I	R		R		R	R					mec+, Type 5	Referral				R	R	R	S	S		R			R	R	R		R
83488	2008	CANINE	MIXED BREED DOG	FEMALE SPAYED	skin	19	32	29		S	R	S	S		S			S	S	S		R		S	S						Clinical				S	R	S	S	S		S			S	S	S		R
072016	2007	CANINE	SHAR-PEI	FEMALE SPAYED	skin	21	33	29		S	R	S	S		S			S	S	S		R		S	I						Clinical				S	R	S	S	S		S			S	S	S		R
83073	2008	CANINE	COCKER SPANIEL	FEMALE SPAYED	ear	23	29	25		S	S	S	S		S			S	S	S		S		S	S						Clinical				S	S	S	S	S		S			S	S	S		S
83074	2008	CANINE	COCKER SPANIEL	FEMALE SPAYED	ear	24	34	30		S	S	S	S		S			S	S	S		S		S	S						Clinical				S	S	S	S	S		S			S	S	S		S
83074	2008	CANINE	COCKER SPANIEL	FEMALE SPAYED	ear	22	33	30		S	S	S	S		S			S	S	S		S		S	S						Clinical				S	S	S	S	S		S			S	S	S		S
82678	2008	CANINE	MIXED BREED DOG	FEMALE SPAYED	skin	20	35	32		S	R	S	S		S					S		R			R						Clinical				S	R	S	S	S		S					S		R
073327	2007	CANINE	BEAGLE	FEMALE SPAYED	urine	22	34	31		S	R	S	S		S			S	S	S		R		S	S						Clinical				S	R	S	S	S		S			S	S	S		R
82657	2008	CANINE	GREAT DANE	MALE CASTRATED	skin	21	34	29		S		S	S		S			S	S	S		R		S	S					0, no band	Referral				S		S	S	S		S			S	S	S		R
093367	2009	CANINE	MIXED BREED DOG	MALE CASTRATED	skin	22	36	32		S	R	S	S		S			S	S	S		R		S	S						Clinical				S	R	S	S	S		S			S	S	S		R
074279	2007	CANINE			skin	24	29	24		S	R	S	S		S			S	S	S		R		S	S						Referral				S	R	S	S	S		S			S	S	S		R
074419	2007	CANINE			skin	21	27	22		S	S	S	S		S			S	S	S		S		S	S						Referral				S	S	S	S	S		S			S	S	S		S
82849	2008	CANINE	LABRADOR RETRIEVER	MALE	skin	19	32	29		S	R	S	S		S			S	S	S		R		S	I					0,	Clinical				S	R	S	S	S		S			S	S	S		R
84025	2008	CANINE	LABRADOR RETRIEVER	MALE	skin	19	32	29		S	S	S	S		S			S	S	S		S		S	I						Clinical				S	S	S	S	S		S			S	S	S		S
065739	2006	CANINE			ear	26	35	31		S	S	S	S		S			S	S	S		S		S	S					0	Referral	No	No		S	S	S	S	S		S			S	S	S		S
065216	2006	CANINE	CAIRN TERRIER	FEMALE SPAYED	urine	20	28	23		S	R	S	S		I			S	S	S		R		S	I		1.5		POS	0	Clinical	No	No		S	R	S	S	S		R			S	S	S		R
065254	2006	CANINE	CAIRN TERRIER	FEMALE SPAYED	urine	16	28	23		S	R	S	S		I			S	S	S		R		S	I		0.5		POS	0	Clinical	No	No		S	R	S	S	S		R			S	S	S		R
070029	2007	CANINE	CAIRN TERRIER	FEMALE SPAYED	urine	17	29	23		S	R	S	S		S			S	S	S		R		S	S					mec+, no band*	Clinical				S	R	S	S	S		S			S	S	S		R
071165	2007	CANINE	CAIRN TERRIER	FEMALE SPAYED	urine	18	29	23		S	R	S	S		S			S	S	S		R		S	I						Clinical				S	R	S	S	S		S			S	S	S		R
073235	2007	CANINE	CAIRN TERRIER	FEMALE SPAYED	skin	13	26	17		S	R	S	S		S			S	S	S		R		S	S					mec+, no band*	Clinical				S	R	R	S	S		S			S	S	S		R
060127	2006	CANINE	BEAGLE	MALE CASTRATED	urine	23	36	34		S	R	S	S		S			S	S	S		R		S	S				0		Clinical	No	No		S	R	S	S	S		S			S	S	S		R
074817	2007	CANINE	SHIH TZU	MALE CASTRATED	ear	23	28	27		S	S	S	S		S			S	S	S		S		S	S						Clinical				S	S	S	S	S		S			S	S	S		S
83985a	2008	CANINE			ear	20	33	29		S	S	S	S		S			S	S	S		S		S	S						Referral				S	S	S	S	S		S			S	S	S		S
83985b	2008	CANINE			ear	20	35	31		S	R	S	S		S			S	S	S		R		R	S						Referral				S	R	S	S	S		S			S	S	S		R
094709	2009	CANINE		FEMALE SPAYED	ear	20	33	29		S	R	S	S		S			S	S	S		R		S	S						Referral				S	R	S	S	S		S			S	S	S		R
074347	2007	CANINE	MINIATURE SCHNAUZER 20-30LBS	FEMALE	skin	22	34	31		S	R	S	S		S			S	S	S		R		S	S						Clinical				S	R	S	S	S		S			S	S	S		R
094070	2009	CANINE			joint	16	25	18		S	R	S	S		S			S	S	S		R		S	S						Referral				S	R	R	S	S		S			S	S	S		R
062153	2006	CANINE			joint	6	10	6		R	R	R	S		S			S	S	S		R		S	S				n/a		Referral	No	No		R	R	R	R	S		S			S	S	S		R
85589	2008	CANINE	BOXER	MALE	urine	21	35			S	R	S	S		S			S	S	S		R		S	S						Clinical				S	R		S	S		S			S	S	S		R
070584	2007	CANINE			joint	19	26	20		S	R	S	S		S			S	S	S		R		S	S						Referral				S	R	R	S	S		S			S	S	S		R
81652	2008	CANINE	WIRE-HAIRED DACHSHUND	MALE	skin	25	34	30		S	S	S	S		S			S	S	S		S		S	S						Clinical				S	S	S	S	S		S			S	S	S		S
065613	2006	CANINE	AKITA	MALE CASTRATED	skin	15	27	16		S	R	S	S		R			R	I	R		R		R	R		3			Type 5	Clinical	No	No		S	R	R	S	S		R			R	R	R		R
070668	2007	CANINE	AKITA	MALE CASTRATED	skin	21	34	29		S	R	S	S		R			R	S	R		R		R	R						Clinical				S	R	S	S	S		R			R	S	R		R
063770	2006	CANINE			skin	25	38	34		S	R	S	S		S			S	S	S		R		R	S					0	Referral	No	No		S	R	S	S	S		S			S	S	S		R
061411	2006	CANINE			eye	30	37	33		S	S	S	S	S	S			S	S	S		S		S	S				0		Referral	No	No		S	S	S	S	S	S	S			S	S	S		S
060364	2006	CANINE	POMERANIAN	MALE CASTRATED	bile	23	42	30		S	R	S	S		S			S	S	S		R		S	S				0		Clinical	No	No		S	R	S	S	S		S			S	S	S		R
093438	2009	CANINE	POMERANIAN	MALE	catheter	23	32	30		S	S	S	S		S			S	S	S		S		S	S						Clinical				S	S	S	S	S		S			S	S	S		S
061361	2006	CANINE	LABRADOR RETRIEVER	FEMALE SPAYED	urine	28	37	32		S	R	S	S		S			S	S	S		R		S	S				42.75		Clinical	No	No		S	R	S	S	S		S			S	S	S		R
83423	2008	CANINE			skin	6	29	8		S	R	S	S		S			S	I	R		R		S	S						Referral				S	R	R	S	S		S			S	R	R		R
093223a	2009	CANINE			skin	18	35	30		S	R	S	S		S			S	S	S		R		S	S						Referral				S	R	S	S	S		S			S	S	S		R
093233b	2009	CANINE			skin	21	32	28		S	S	S	S		S			S	S	S		S		R	S						Referral				S	S	S	S	S		S			S	S	S		S
094530	2009	CANINE			ear	11	25	15		S	R	S	S		R			R	I	R		R		R	R					POS	Referral				S	R	R	S	S		R			R	R	R		R
094531	2009	CANINE			skin	12	25	16		S	R	S	S		R			R	I	R		R		R	R					POS	Referral				S	R	R	S	S		R			R	R	R		R
83905	2008	CANINE	BERNESE MOUNTAIN DOG	MALE	skin	17	32	27		S	R	S	S		S			S	S	S		R		R	S						Clinical				S	R	S	S	S		S			S	S	S		R
84802	2008	CANINE	BERNESE MOUNTAIN DOG	MALE	joint	11	25	15		S	R	S	S		R			R	S	R		R		R	R						Clinical				S	R	R	S	S		R			R	S	R		R
85713	2008	CANINE	BERNESE MOUNTAIN DOG	MALE	joint	11	24		S	S	R	S	S		R	I		R	S	R	I	R	S	R	R						Clinical			S	S	R		S	S		R	R		R	S	R	R	R	S
091106	2009	CANINE	BERNESE MOUNTAIN DOG	MALE	joint	8	26	15	S	S	R	S	S		R	I		R	S	R	I	R	S	R	R					POS	Clinical			S	S	R	R	S	S		R	R		R	S	R	R	R	S
091673a	2009	CANINE	BERNESE MOUNTAIN DOG	MALE	joint	12			S	S	R	S	S		R	I		R	I		I	R	S	R	R						Clinical			S	S	R		S	S		R	R		R	R		R	R	S
091673b	2009	CANINE	BERNESE MOUNTAIN DOG	MALE	joint	11			S	S	R	S	S		R	R		R	I		R	R	S	R	R						Clinical			S	S	R		S	S		R	R		R	R		R	R	S
000000	2009	CANINE	YORKSHIRE TERRIER	MALE CASTRATED	urine	6	17	6	S	R	R	R	S		R	S		R	I	R	I	R	S	R	R					POS				S	R	R	R	R	S		R	S		R	R	R	R	R	S
091909	2009	CANINE			skin	9	24	12	S	S	R	S	S		S	I		S	I	R	R	R	S	R	R					POS	Referral			S	S	R	R	S	S		S	R		S	R	R	R	R	S
093596	2009	CANINE			skin	20	35	31		S	R	S	S		R			R	S	S		R		R	S						Referral				S	R	S	S	S		R			R	S	S		R
094014a	2009	CANINE	YORKSHIRE TERRIER	MALE CASTRATED	urine	6	20	6	S	S	R	S	S		R	I		R	I	R	R	R	S	R	R					POS	Clinical			S	S	R	R	S	S		R	R		R	R	R	R	R	S
094039	2009	CANINE	YORKSHIRE TERRIER	MALE CASTRATED	urine	6	20	6		R	R	S	S		R			R	I	R		R		R	R					POS	Clinical				R	R	R	S	S		R			R	R	R		R
85037	2008	CANINE	COCKER SPANIEL	MALE	skin	6	21	10	S	S	R	S	S		R	I		R	S	R	I	R	S	R	R						Clinical			S	S	R	R	S	S		R	R		R	S	R	R	R	S
85037	2008	CANINE	COCKER SPANIEL	MALE	skin	6	23	11	S	S	R	S	S		S	S		S	S	R	S	R	S	S	S						Clinical			S	S	R	R	S	S		S	S		S	S	R	S	R	S
85456	2008	CANINE	ENGLISH BULLDOG	MALE CASTRATED	skin	6	19			R	R	R	S		S			S	I	I		R		S	S						Clinical				R	R		R	S		S			S	R	R		R
090723	2009	CANINE	BORDER TERRIER	FEMALE SPAYED	skin	19	34			S	R	S	S		S			S	S	S		R		S	I						Clinical				S	R		S	S		S			S	S	S		R
091217	2009	CANINE	BORDER TERRIER	FEMALE SPAYED	skin	20	37	31		S	R	S	S		S			S	S	S		R		S	S						Clinical				S	R	S	S	S		S			S	S	S		R
091879	2009	CANINE	COCKER SPANIEL	MALE CASTRATED	urine	22	36	>30		S	R	S	S		S			S	S	S		R		S	S						Clinical				S	R	S	S	S		S			S	S	S		R
092741	2009	CANINE	COCKER SPANIEL	MALE CASTRATED	urine	6	22	11		S	R	S	S	R	R			R	I			R		R	R					POS	Clinical				S	R	R	S	S	R	R			R	R			R
81218	2008	CANINE	BEAGLE	FEMALE SPAYED	ear	12	27	16	S	S	R	S	S		R	I		R	I	R		R	S	R	R					mec+, Type 5	Clinical			S	S	R	R	S	S		R	R		R	R	R		R	S
090232	2009	CANINE	MIXED BREED DOG	MALE	skin	19	34			S	R	S	S		S			S	S	S		R		S	S					Neg	Clinical				S	R		S	S		S			S	S	S		R
060102	2006	CANINE	COCKER SPANIEL	FEMALE SPAYED	ear	25	34	30		S	S	S	S		S			S	S	S		S		S	S				0		Clinical	No	No		S	S	S	S	S		S			S	S	S		S
062583	2006	CANINE			skin	6	9	6		R	R	S	S		R			R	S	R		R		S	S				POS		Referral	No	No		R	R	R	S	S		R			R	S	R		R
062584	2006	CANINE			skin	16	30	19		S	R	S	S		R			R	S	R		R		R	R		1.5		27.25	Type 5 (321 bp)	Referral	No	No		S	R	R	S	S		R			R	S	R		R
81172	2008	CANINE	YORKSHIRE TERRIER	FEMALE SPAYED	skin	26	34	30		S	S	S	S		S			S	S	S		S		S	S						Clinical				S	S	S	S	S		S			S	S	S		S
064353	2006	CANINE	YORKSHIRE TERRIER	MALE CASTRATED	skin	23	37	30		S	R	S	S		S			S	S	S		R		S	S					0	Clinical	No	No		S	R	S	S	S		S			S	S	S		R
84186	2008	CANINE	ROTTWEILER	MALE	skin	18	32	21		S	R	S	S	I	S			S	I			R		S	S						Clinical				S	R	S	S	S	R	S			S	R			R
84187	2008	CANINE	ROTTWEILER	MALE	skin	19	34	24		S	R	S	S		S			S	I	R		R		S	S						Clinical				S	R	S	S	S		S			S	R	R		R
063156	2006	CANINE	CAIRN TERRIER	FEMALE SPAYED	skin	20	34	28		S	R	S	S		S			S	S	S		R		S	S		0.125		0		Clinical	No	No		S	R	S	S	S		S			S	S	S		R
85712	2008	CANINE	PEKINGESE	FEMALE SPAYED	urine	20	34			S	R	S	S		S			S	S	S		R		R	S						Clinical				S	R		S	S		S			S	S	S		R
85725	2008	CANINE	PEKINGESE	FEMALE SPAYED	urine	20	33			S	R	S	S		S			S	S	S		R		R	S						Clinical				S	R		S	S		S			S	S	S		R
85732	2008	CANINE	BERNESE MOUNTAIN DOG	FEMALE SPAYED	skin	23	33			S	S	S	S		S			S	S	S		S		S	S						Clinical				S	S		S	S		S			S	S	S		S
060673	2006	CANINE	SHETLAND SHEEPDOG	FEMALE SPAYED	skin	24	39	35		S	R	S	S		S			S	S	S		R		S	S				44.41		Clinical	No	No		S	R	S	S	S		S			S	S	S		R
80948	2008	CANINE	LABRADOR RETRIEVER	MALE	skin	22	35	30		S	R	S	S		S			S	S	S		R		S	S						Clinical				S	R	S	S	S		S			S	S	S		R
81822	2008	CANINE	MIXED BREED DOG	FEMALE SPAYED	ear	30	37	33		S	S	S	S		S			S	S	S		S		R	S					0, no band	Referral				S	S	S	S	S		S			S	S	S		S
091189	2009	CANINE			skin	18	33	29		S	R	S	S		R			R	S	S		R		S	S						Referral				S	R	S	S	S		R			R	S	S		R
075526	2007	CANINE	MIXED BREED DOG	FEMALE SPAYED	ear	27	35	31		S	S	S	S		S			S	S	S		S		R	S						Referral				S	S	S	S	S		S			S	S	S		S
076373	2007	CANINE			ear	23	30	28		S	R	S	S		S			S	S	S		R		S	S						Referral				S	R	S	S	S		S			S	S	S		R
85674	2008	CANINE			urine	22	33			S	R	S	S		R			R	S	S		R		S	R						Referral				S	R		S	S		R			R	S	S		R
83260	2008	CANINE			urine	21	34	29		S	R	S	S		I			S	S	S		R		S	S						Referral				S	R	S	S	S		R			S	S	S		R
091428	2009	CANINE	LABRADOR RETRIEVER	FEMALE SPAYED	joint	6	24	6	S	S	R	S	S		R	R		R	I	R	R	R	S	R	R					POS	Clinical			S	S	R	R	S	S		R	R		R	R	R	R	R	S
065267	2006	CANINE	GERMAN SHEPHERD DOG	MALE CASTRATED	urine	25	32	29		S	S	S	S		S			S	S	S		S		S	S					0	Clinical	No	No		S	S	S	S	S		S			S	S	S		S
072770	2007	CANINE			nasal	20	35	30		S	R	S	R		R			R	R	S		R		R	R					Neg	Referral				S	R	S	S	R		R			R	R	S		R
091260	2009	CANINE			skin	21	35	30		S	R	S	S		S			S	S	S		R		S	S					Neg	Referral				S	R	S	S	S		S			S	S	S		R
063267	2006	CANINE			ear	27	35	30		S	S	S	S		S			S	S	S		S		S	S					0	Referral	No	No		S	S	S	S	S		S			S	S	S		S
090573	2009	CANINE			ear	21	34			S	R	S	S		S			S	S	S		R		R	S						Referral				S	R		S	S		S			S	S	S		R
062999	2006	CANINE			ear	23	33	29		S	S	S	S		S			S	S	S		S		S	S				38.44		Referral	No	No		S	S	S	S	S		S			S	S	S		S
83805	2008	CANINE			urine	21	35	30		S	R	S	S		S			S	S	S		R		S	S						Referral				S	R	S	S	S		S			S	S	S		R
062592	2006	CANINE	SCOTTISH TERRIER	MALE CASTRATED	skin	8	24	10		S	R	S	S		R			R	S	R		R		R	R		>256		27.44	Type 5	Clinical	No	No		S	R	R	S	S		R			R	S	R		R
062040	2006	CANINE	MIXED BREED DOG	FEMALE SPAYED	skin	22	33	28		S	R	S	S		S			S	S	R		R		S	S				37.16		Clinical	No	No		S	R	S	S	S		S			S	S	R		R
074191	2007	CANINE			urine	28	33	32		S	S	S	S		S			S	S	S		S		S	S						Referral				S	S	S	S	S		S			S	S	S		S
090785	2009	CANINE	MIXED BREED DOG	MALE	skin	23	33			S	S	S	S		S			S	S	S		S		S	S						Clinical				S	S		S	S		S			S	S	S		S
82210	2008	CANINE	STAFFORDSHIRE TERRIER	MALE CASTRATED	skin	20	32	29		S		S	S		S			S	S	R		R		S	R					0, no band	Clinical				S		S	S	S		S			S	S	R		R
82211	2008	CANINE	STAFFORDSHIRE TERRIER	MALE CASTRATED	skin	19	33	29		S		S	S		S			S	S	R		R		S	R					0, no band	Clinical				S		S	S	S		S			S	S	R		R
063728	2006	CANINE	YORKSHIRE TERRIER	MALE CASTRATED	skin	27	38	33		S	S	S	S		S			S	S	S		S		S	S					0	Clinical	No	No		S	S	S	S	S		S			S	S	S		S
074821	2007	CANINE	DACHSHUND	MALE CASTRATED	nasal	16	24	20		S	R	S	S		S			S	S	S		R		R	S					0, no band	Referral				S	R	R	S	S		S			S	S	S		R
093121	2009	CANINE	GOLDEN RETRIEVER	MALE CASTRATED	skin	22	33	28		S	S	S	S		S			S	S	S		S		S	S						Referral				S	S	S	S	S		S			S	S	S		S
090121	2009	CANINE			skin	12	27			S	R	S	S		R			R	S	R		R		R	R					POS	Referral				S	R		S	S		R			R	S	R		R
092152	2009	CANINE	ENGLISH SPRINGER SPANIEL	FEMALE SPAYED	skin	6	21	6	S	R	R	S	S		R	I		R	R	R	I	R	S	R	R					POS	Clinical			S	R	R	R	S	S		R	R		R	R	R	R	R	S
093187	2009	CANINE	ENGLISH SPRINGER SPANIEL	FEMALE SPAYED	skin	6	22	6	S	S	R	S	S		R	I		R	I	R	I	R	S	R	R					POS	Clinical			S	S	R	R	S	S		R	R		R	R	R	R	R	S
093187	2009	CANINE	ENGLISH SPRINGER SPANIEL	FEMALE SPAYED	skin	23	32	28		S	S	S	S		S			S	S	S		S		S	S						Clinical				S	S	S	S	S		S			S	S	S		S
060858	2006	CANINE			ear	23	37	32		S	R	S	S		S			S	S	I		R		S	I				0		Referral	No	No		S	R	S	S	S		S			S	S	R		R
064768	2006	CANINE	DOBERMAN PINSCHER	MALE CASTRATED	joint	20	29	28		S	R	S	S		S			S	S	S		R		S	S				Neg		Clinical	No	No		S	R	S	S	S		S			S	S	S		R
093178	2009	CANINE	COCKER SPANIEL	MALE	skin	20	34	29		S	R	S	S		S			S	S	S		R		S	S						Clinical				S	R	S	S	S		S			S	S	S		R
063712	2006	CANINE	MIXED BREED DOG	FEMALE SPAYED	urine	26	35	32		S	R	S	S		S			S	S	S		R		S	S					0	Clinical	No	No		S	R	S	S	S		S			S	S	S		R
090712	2009	CANINE	MIXED BREED DOG	MALE CASTRATED	urine	18	36			S	R	S	S		R			R	S	S		R		S	I						Referral				S	R		S	S		R			R	S	S		R
090107	2009	CANINE			skin	19	34			S	R	S	S		S			S	S	S		R		R	S					POS	Referral				S	R		S	S		S			S	S	S		R
093069	2009	CANINE			bone	19	33	30		S	R	S	S		S			S	S	S		R		S	S						Referral				S	R	S	S	S		S			S	S	S		R
063287	2006	CANINE	GERMAN SHEPHERD DOG	MALE	thoracic	6	23	8		S	R	S	S		R			R	S	R		R		R	R		>256			Type 5	Clinical	No	No		S	R	R	S	S		R			R	S	R		R
064887	2006	CANINE	MIXED BREED DOG	FEMALE SPAYED	skin	14	26	19		S	R	S	S		S			S	S	S		R		S	I		2		POS	0	Clinical	No	No		S	R	R	S	S		S			S	S	S		R
091591	2009	CANINE	LABRADOR RETRIEVER	MALE	skin	18	38	28		S	R	S	S		S			S	S	S		R		S	S					Neg	Clinical				S	R	S	S	S		S			S	S	S		R
092311	2009	CANINE			skin	23	35	30		S	S	S	S		S			S	S	S		S		S	S						Referral				S	S	S	S	S		S			S	S	S		S
83138	2008	CANINE	MIXED BREED DOG	MALE CASTRATED	skin	24	33	28		S	S	S	S		S			S	S	S		S		S	S						Clinical				S	S	S	S	S		S			S	S	S		S
80444	2008	CANINE			joint	20	34	29		S	R	S	S		S			S	S	S		R		R	S						Referral				S	R	S	S	S		S			S	S	S		R
074780	2007	CANINE	LABRADOR RETRIEVER	MALE CASTRATED	skin	6	22	6		S	R	I	S		S			S	S	S		R		S	S					mec+, no band	Clinical				S	R	R	R	S		S			S	S	S		R
075303	2007	CANINE	LABRADOR RETRIEVER	MALE CASTRATED	skin	6	22	6		S	R	S	S		R			R	I	R		R		R	R					mec+, Type 5	Clinical				S	R	R	S	S		R			R	R	R		R
070676	2007	CANINE	MIXED BREED DOG	MALE CASTRATED	skin	6	23	12		S	R	S	S		R			R	S	R		R		R	R					mec+, Type 5	Clinical				S	R	R	S	S		R			R	S	R		R
060448	2006	CANINE	LABRADOR RETRIEVER	MALE CASTRATED	ear	28	34	32		S	S	S	S		S			S	S	S		R		S	S				39.7		Referral	No	No		S	S	S	S	S		S			S	S	S		R
091717	2009	CANINE	LABRADOR RETRIEVER	FEMALE SPAYED	skin	21	34	30		S	R	S	S		S			S	S	S		R		R	S					Neg	Clinical				S	R	S	S	S		S			S	S	S		R
062635	2006	CANINE	MIXED BREED DOG	FEMALE SPAYED	skin	17	28	23		S	R	S	S		S			S	S	S		R		R	I				n/a		Clinical	No	No		S	R	S	S	S		S			S	S	S		R
82379	2008	CANINE			skin	6	22	6		R		R	S		R			R	S	S		R		S	S					mec+, Type 3	Referral				R		R	R	S		R			R	S	S		R
094116	2009	CANINE			skin	21	35	30		S	R	S	S		S			S	S	S		R		R	S					Neg	Referral				S	R	S	S	S		S			S	S	S		R
83222	2008	CANINE	GERMAN SHEPHERD DOG	FEMALE SPAYED	skin	19	26	20		S	R	S	S		S			S	S	S		R		S	S						Clinical				S	R	R	S	S		S			S	S	S		R
83824	2008	CANINE	GERMAN SHEPHERD DOG	FEMALE SPAYED	skin	18	25	21		S	R	S	S		S			S	S	S		R		S	S						Clinical				S	R	S	S	S		S			S	S	S		R
072706a	2007	CANINE	STAFFORDSHIRE TERRIER	FEMALE SPAYED	skin	21	33	31		S	R	S	S		S			S	S	S		R		S	S						Clinical				S	R	S	S	S		S			S	S	S		R
072706b	2007	CANINE	STAFFORDSHIRE TERRIER	FEMALE SPAYED	skin	25	34	20		S	S	S	S		S			S	S	S		S		S	S						Clinical				S	S	R	S	S		S			S	S	S		S
090231	2009	CANINE	ENGLISH STAFFORDSHIRE TERRIER	FEMALE SPAYED	urine	25	38			S	R	S	S		S			S	S	S		R		S	S					Neg	Clinical				S	R		S	S		S			S	S	S		R
093417	2009	CANINE			ear	24	32	29		S	S	S	S		S			S	S	S		S		S	S						Referral				S	S	S	S	S		S			S	S	S		S
064853	2006	CANINE	PUG	MALE	urine	26	37	33		S	R	S	S		S			S	S	S		R		S	S					0	Clinical	No	No		S	R	S	S	S		S			S	S	S		R
092881	2009	CANINE	ENGLISH BULLDOG	MALE CASTRATED	skin	19	34	30		S	R	S	S		S			S	S	S		R		S	S						Clinical				S	R	S	S	S		S			S	S	S		R
076122	2007	CANINE	YORKSHIRE TERRIER	MALE CASTRATED	urine	12	24	14		S	R	S	S		R		R	R	S			R		R	R					mec+, Type 5	Clinical				S	R	R	S	S		R		R	R	S			R
073036	2007	CANINE			ear	14	26	19		S	R	S			S			S	S	S		R		S	S					mec+, no band*	Referral				S	R	R	S			S			S	S	S		R
061036	2006	CANINE	GERMAN SHEPHERD DOG	FEMALE SPAYED	ear	24	34	31		S	R	S	S		S			S	R	S		R		S	R				41.55		Clinical	No	No		S	R	S	S	S		S			S	R	S		R
074233	2007	CANINE	GERMAN SHEPHERD DOG	FEMALE SPAYED	ear	23	36	32		S	R	S	S		S			S	R	S		R		R	S						Clinical				S	R	S	S	S		S			S	R	S		R
063856	2006	CANINE	KERRY BLUE TERRIER	FEMALE	vaginal	20	33	28		S	R	S	S		R			R	S	S		R		S	S		0.38			0	Referral	No	No		S	R	S	S	S		R			R	S	S		R
075453	2007	CANINE	MIXED BREED DOG	MALE CASTRATED	skin	20	29	26		S	R	S	S		R			R	S	S		R		R	R						Clinical				S	R	S	S	S		R			R	S	S		R
076454	2007	CANINE			skin	27	35	32		S	S	S	S		S			S	S	S		S		S	S						Referral				S	S	S	S	S		S			S	S	S		S
85083	2008	CANINE	KERRY BLUE TERRIER	FEMALE	skin	6	20	6	S	R	R	S	S	R	R	S		R	S	R	I	R	S	R	R						Clinical			S	R	R	R	S	S	R	R	S		R	S	R	R	R	S
85084	2008	CANINE	KERRY BLUE TERRIER	FEMALE	skin	6	20	6	S	R	R	S	S	R	R	S		R	S	R	I	R	S	R	R						Clinical			S	R	R	R	S	S	R	R	S		R	S	R	R	R	S
85089	2008	CANINE	MIXED BREED DOG	MALE CASTRATED	skin	6	23	14	S	S	R	S	S		R	I		R	S	R	I	R	S	R	R						Clinical			S	S	R	R	S	S		R	R		R	S	R	R	R	S
85638	2008	CANINE	KERRY BLUE TERRIER	FEMALE	skin	6	20		S	R	R	S	S		R	I		R	S	R	I	R	S	R	R						Clinical			S	R	R		S	S		R	R		R	S	R	R	R	S
092208	2009	CANINE	MIXED BREED DOG	MALE CASTRATED	skin	18	30	24		S	R	S	S		R			R	I	S		R		R	R						Clinical				S	R	S	S	S		R			R	R	S		R
092208	2009	CANINE	MIXED BREED DOG	MALE CASTRATED	skin	15	30	27		S	R	S	S		S			S	R	R		R		S	S					Neg	Clinical				S	R	S	S	S		S			S	R	R		R
062937	2006	CANINE			ear	24	33	28		S	S	S	S		S			S	S	S		S		R	S				40.04		Referral	No	No		S	S	S	S	S		S			S	S	S		S
062830	2006	CANINE			skin	23	36	30		S	R	S	S		S			S	S	S		R		S	S				44.99		Referral	No	No		S	R	S	S	S		S			S	S	S		R
80962	2008	CANINE	LABRADOR RETRIEVER	FEMALE SPAYED	skin	16	28	21		S	R	S	S		R			R	I	R		R		R	R					mec+, Type 5	Clinical				S	R	S	S	S		R			R	R	R		R
83818	2008	CANINE	MINIATURE PINSCHER	FEMALE SPAYED	skin	19	33	29		S	R	S	S		R			R	S	S		R		R	I						Clinical				S	R	S	S	S		R			R	S	S		R
060732	2006	CANINE	SHETLAND SHEEPDOG	FEMALE	ear	24	35	32		S	R	S	S		S			S	S	S		R		R	S				0		Clinical	No	No		S	R	S	S	S		S			S	S	S		R
074654	2007	CANINE	MIXED BREED DOG	FEMALE SPAYED	skin	11	25	15		S	R	S	S		R			R	I	R		R		R	R					mec+, Type 5	Clinical				S	R	R	S	S		R			R	R	R		R
074655	2007	CANINE	MIXED BREED DOG	FEMALE SPAYED	skin	11	25	15		S	R	S	S		R			R	I	R		R		R	R					mec+, Type 5	Clinical				S	R	R	S	S		R			R	R	R		R
073038	2007	CANINE			skin	20	34	28		S	R	S	S		S			S	S	S		R		R	S						Referral				S	R	S	S	S		S			S	S	S		R
064615	2006	CANINE	GREYHOUND	FEMALE SPAYED	joint	29	37	27		S	S	S	S		S			S	S	S		S		S	S				Neg		Clinical	No	No		S	S	S	S	S		S			S	S	S		S
070169	2007	CANINE	CAIRN TERRIER	MALE CASTRATED	skin	21	33	29		S	R	S	S		S			S	S	S		R		S	S					Neg	Clinical				S	R	S	S	S		S			S	S	S		R
83898	2008	CANINE			milk	18	32	30		S	R	S	S		S			S	S	S		R		S	S						Referral				S	R	S	S	S		S			S	S	S		R
075112	2007	CANINE	MIXED BREED DOG	MALE CASTRATED	skin	20	33	28		S	R	S	S		R			R	S	S		R		S	S						Clinical				S	R	S	S	S		R			R	S	S		R
075408	2007	CANINE	MIXED BREED DOG	MALE CASTRATED	skin	6	20	6		R	R	S	S		R			R	I	R		R		R	R					mec+, Type 5	Clinical				R	R	R	S	S		R			R	R	R		R
075546	2007	CANINE	MIXED BREED DOG	MALE CASTRATED	skin	6	21	6		S	R	S	S		R			R	S	R		R		R	R					mec+, Type 5	Clinical				S	R	R	S	S		R			R	S	R		R
075854	2007	CANINE	MIXED BREED DOG	MALE CASTRATED	skin	6	21	8		S	R	S	S		R			R	I	R		R		R	R					mec+, Type 5	Clinical				S	R	R	S	S		R			R	R	R		R
80039	2008	CANINE	MIXED BREED DOG	MALE CASTRATED	skin	6	23	6		R	R	S	S		R			R	R	R		R		R	R					mec+, Type 5	Clinical				R	R	R	S	S		R			R	R	R		R
072666	2007	CANINE	AUSTRALIAN CATTLE DOG	FEMALE SPAYED	skin	19	35	32		S	R	S	S		S			S	S	S		R		R	S						Clinical				S	R	S	S	S		S			S	S	S		R
072909	2007	CANINE	AUSTRALIAN CATTLE DOG	FEMALE SPAYED	skin	19	33	29		S	R	S	S		S			S	S	S		R		R	S						Clinical				S	R	S	S	S		S			S	S	S		R
090649	2009	CANINE			skin	14	24			S	R	S	S		S			S	S	R		R		S	S					POS	Referral				S	R		S	S		S			S	S	R		R
092277	2009	CANINE			skin	6	27	6		S	R	S	S		R			R	S	S		R		R	I					Neg	Referral				S	R	R	S	S		R			R	S	S		R
092665	2009	CANINE	ENGLISH BULLDOG	MALE	skin	6	27	6		S	R	S	S		R			R	S	S		R		R	S					POS	Clinical				S	R	R	S	S		R			R	S	S		R
093220	2009	CANINE			skin	11	23	15		S	R	S	S		R			R	I	R		R		R	R					POS	Referral				S	R	R	S	S		R			R	R	R		R
091333	2009	CANINE			skin	9	24	14	S	S	R	S	S		R	I		R	I	R	I	R	S	R	R					POS	Referral			S	S	R	R	S	S		R	R		R	R	R	R	R	S
092279	2009	CANINE			skin	19	34	29		S	R	S	S		R			R	S	S		R		R	I						Referral				S	R	S	S	S		R			R	S	S		R
092580	2009	CANINE	ENGLISH BULLDOG	FEMALE	trach/bronch	19	32	28		S	R	S	R		R			R	R	S		R		R	R					Neg	Clinical				S	R	S	S	R		R			R	R	S		R
093157	2009	CANINE			skin	18	35	31		S	R	S	R		R			R	I	S		R		R	R						Referral				S	R	S	S	R		R			R	R	S		R
074428	2007	CANINE	GREAT DANE	MALE CASTRATED	skin	6	21	6		R	R	R	S		S			S	I	S		R		S	S					mec+, Type 3	Referral				R	R	R	R	S		S			S	R	S		R
070367a	2007	CANINE	COCKER SPANIEL	FEMALE SPAYED	skin	26	36	33		S	R	S	S		S			S	S	S		R		R	S					Neg	Referral				S	R	S	S	S		S			S	S	S		R
070367c	2007	CANINE	COCKER SPANIEL	FEMALE SPAYED	skin	28	37	32		S	S	S	S		S			S	S	S		S		S	S					Neg	Referral				S	S	S	S	S		S			S	S	S		S
073193	2007	CANINE			nasal	20	34	29		S	R	S	S		S			S	S	S		R		S	I						Referral				S	R	S	S	S		S			S	S	S		R
81087	2008	CANINE			bone	23	35	31		S	R	S	S		S			S	S	S		R		R	S						Referral				S	R	S	S	S		S			S	S	S		R
061834	2006	CANINE			skin	16	25	17		S	R	S	S		R			R	S	R		R		R	R		64		26.16	Type 5 (300 bp)	Referral	No	No		S	R	R	S	S		R			R	S	R		R
062564	2006	CANINE			skin	15	25	17		S	R	S	S		R			R	S	R		R		R	R				28.6	Type 5 (344 bp)	Referral	No	No		S	R	R	S	S		R			R	S	R		R
82535	2008	CANINE	GERMAN SHEPHERD DOG	MALE CASTRATED	skin	17	33	30	S	S		S	S		S	S		S	S	S		R	S	S	S					0, no band	Clinical			S	S		S	S	S		S	S		S	S	S		R	S
83013	2008	CANINE	GERMAN SHEPHERD DOG	MALE CASTRATED	skin	6	20	6	S	R	R	R	S		R	I		R	S	R	I	R	S	R	R					mec+,	Clinical			S	R	R	R	R	S		R	R		R	S	R	R	R	S
062334	2006	CANINE			urine	28	40	36		S	R	S	S		S			S	S	S		R		S	S				40.37		Referral	No	No		S	R	S	S	S		S			S	S	S		R
073791	2007	CANINE	SHIH TZU	FEMALE SPAYED	skin	6	24	13		S	R	S	S		R			R	I	R		R		R	R					mec+, Type 5	Clinical				S	R	R	S	S		R			R	R	R		R
065802	2006	CANINE	LABRADOR RETRIEVER	FEMALE SPAYED	skin	10	24	12		S	R	S	S		R			R	S	R		R		R	R		>256			Type 5	Clinical	No	No		S	R	R	S	S		R			R	S	R		R
065862	2006	CANINE	LABRADOR RETRIEVER	FEMALE SPAYED	skin	6	20	8		S	R	S	S		R			R	S	R		R		R	R		>256			Type 5	Clinical	No	No		S	R	R	S	S		R			R	S	R		R
070179	2007	CANINE	LABRADOR RETRIEVER	FEMALE SPAYED	skin	6	24	13		S	R	S	S		R			R	S	R		R		R	R					mec+, Type 5	Clinical				S	R	R	S	S		R			R	S	R		R
074059	2007	CANINE	ENGLISH SPRINGER SPANIEL	MALE CASTRATED	skin	19	33	30		S	R	S	S		S			S	S	S		R		S	S						Clinical				S	R	S	S	S		S			S	S	S		R
81781	2008	CANINE	ROTTWEILER	FEMALE SPAYED	skin	18	32	28		S	R	S	S		S			S	S	S		R		S	R					0, no band	Referral				S	R	S	S	S		S			S	S	S		R
090711	2009	CANINE	BOSTON TERRIER	MALE	ear	13	27			S	R	S	S		R			R	S	R		R		R	R					POS	Referral				S	R		S	S		R			R	S	R		R
091701	2009	CANINE	ENGLISH BULLDOG	FEMALE SPAYED	trach/bronch	14	27	19		S	R	S	S		R			S	S	S		R		S	S						Clinical				S	R	R	S	S		R			S	S	S		R
093762	2009	CANINE	MIXED BREED DOG	MALE	skin	6	20	9		S	R	S	S		R			R	I	R		R		R	R					POS	Clinical				S	R	R	S	S		R			R	R	R		R
092979	2009	CANINE			skin	>20				S	S	S	S		S			S	S	R		S		S	S						Referral				S	S		S	S		S			S	S	R		S
83638	2008	CANINE			skin	9	27	13		S	R	S	S		S			S	S	S		R		S	S						Referral				S	R	R	S	S		S			S	S	S		R
094384	2009	CANINE	LABRADOR RETRIEVER	FEMALE SPAYED	skin	20	30	24		S	R	S	S		S			S	S	S		R		S	S						Clinical				S	R	S	S	S		S			S	S	S		R
093681	2009	CANINE	YORKSHIRE TERRIER	FEMALE SPAYED	skin	17	34	29		S	R	S	S	S	S			S	S	S		R	S	R	S	=0.25				Neg	Clinical				S	R	S	S	S	S	S			S	S	S		R	S
060432	2006	CANINE	LABRADOR RETRIEVER	MALE CASTRATED	skin	15	28	20		S	R	S	S		S			S	S	S		R		S	S		3		POS	0	Clinical	No	No		S	R	R	S	S		S			S	S	S		R
062688	2006	CANINE	LABRADOR RETRIEVER	MALE CASTRATED	skin	29	41	37		S	R	S	S		R			R	S	S		R		R	S				37.35		Clinical	No	No		S	R	S	S	S		R			R	S	S		R
090514	2009	CANINE	TOY POODLE	FEMALE SPAYED	liver	24	>35			S	R	S	S		S			S	S	S		R		S	S						Clinical				S	R		S	S		S			S	S	S		R
072658	2007	CANINE	MALTESE DOG	FEMALE SPAYED	skin	22	35	32		S	R	S	S		S			S	S	S		R		S	S						Clinical				S	R	S	S	S		S			S	S	S		R
061098	2006	CANINE	BICHON FRISE	FEMALE SPAYED	urine	25	37	32		S	R	S	S		S			S	S	S		R		R	R				0		Clinical	No	No		S	R	S	S	S		S			S	S	S		R
062735	2006	CANINE	MIXED BREED DOG	FEMALE SPAYED	skin	22	36	32		S	R	S	S		R		S	R	S	S		R		R	S		0.19		0		Clinical	No	No		S	R	S	S	S		R		S	R	S	S		R
81988a	2008	CANINE	GERMAN SHEPHERD DOG	MALE CASTRATED	skin	20	34	29		S	R	S	S		R			R	S	S		R		R	S					0, no band	Clinical				S	R	S	S	S		R			R	S	S		R
81988b	2008	CANINE	GERMAN SHEPHERD DOG	MALE CASTRATED	skin	19	33	29		S	R	S	S		S			S	S	S		R		S	S					0, no band	Clinical				S	R	S	S	S		S			S	S	S		R
073908	2007	CANINE	LABRADOR RETRIEVER	MALE CASTRATED	joint	11	22	13		S	R	S	S		R			R	I	R		R		R	R					mec+, Type 5	Clinical				S	R	R	S	S		R			R	R	R		R
090875	2009	CANINE	MIXED BREED DOG	MALE CASTRATED	skin	6	17			R	R	R	S		S			S	I	S		R		S	S					POS	Clinical				R	R		R	S		S			S	R	S		R
094402	2009	CANINE	MIXED BREED DOG	MALE CASTRATED	skin	23	32	28		S	R	S	S		S			S	S	S		R		S	S						Clinical				S	R	S	S	S		S			S	S	S		R
83077	2008	CANINE			skin	20	33	28		S	R	S	S		R			R	S	S		R		S	R					0,	Referral				S	R	S	S	S		R			R	S	S		R
82172a	2008	CANINE	YORKSHIRE TERRIER	FEMALE SPAYED	eye	6	6	6		R		S	S	R	R			R	S	R		R		S	S					mec+, Type 2	Clinical				R		R	S	S	R	R			R	S	R		R
82172b	2008	CANINE	YORKSHIRE TERRIER	FEMALE SPAYED	eye	11	24	13		S		S	S	R	R			R	S	R		R		R	R					mec+, Type 5	Clinical				S		R	S	S	R	R			R	S	R		R
82186	2008	CANINE	YORKSHIRE TERRIER	FEMALE SPAYED	eye	6	6	6		R		S	S	R	R			R		R		R		S	S					mec+, Type 2	Clinical				R		R	S	S	R	R			R		R		R
070608	2007	CANINE			urine	27	34	28		S	R	S	S		S			S	S	S		R		S	I						Referral				S	R	S	S	S		S			S	S	S		R
062315c	2006	CANINE			ear	24	34	33		S	S	S	S		S			S	S	S		S		S	S				39.5		Referral	No	No		S	S	S	S	S		S			S	S	S		S
065047	2006	CANINE			ear	27	35	32		S	S	S	S		S			S	S			S		S	S				Neg		Referral	No	No		S	S	S	S	S		S			S	S			S
065682	2006	CANINE			urine	26	35	32		S	S	S	S		S			S	S	S		S		S	S					0	Referral	No	No		S	S	S	S	S		S			S	S	S		S
094261	2009	CANINE			urine	8	21	12		S	R	S	S		R			R	I	R		R		R	R					POS	Referral				S	R	R	S	S		R			R	R	R		R
82524	2008	CANINE			skin	21	33	30		S		S	S		S			S	S	S		R		S	S					0, no band	Referral				S		S	S	S		S			S	S	S		R
84778	2008	CANINE			nasal	20	35	30		S	R	S	S		R			R	R	S		R		R	R						Referral				S	R	S	S	S		R			R	R	S		R
80064	2008	CANINE			ear	26	35	28		S	S	S	S		S			S	S	S		S		S	S						Referral				S	S	S	S	S		S			S	S	S		S
071061	2007	CANINE			ear	28	38	>30		S	S	S	S		S			S	S	S		S		S	S						Referral				S	S	S	S	S		S			S	S	S		S
074707	2007	CANINE			ear	26	25	25		S	S	S	S		S			S	S	S		S		S	S						Referral				S	S	S	S	S		S			S	S	S		S
061574	2006	CANINE	NEWFOUNDLAND	FEMALE	skin	6	22	6		S	R	S	S		R			R	I	R		R		R	R		>256		25.84	Type 5 (262 bp)	Clinical	No	No		S	R	R	S	S		R			R	R	R		R
061575	2006	CANINE	NEWFOUNDLAND	FEMALE	skin	6	23	6		S	R	S	S		R			R	I	R		R		R	R				n/a		Clinical	No	No		S	R	R	S	S		R			R	R	R		R
092879	2009	CANINE	BASSET HOUND	FEMALE SPAYED	trach/bronch	22	34	30		S	S	S	S		S			S	S	S		S		S	S						Clinical				S	S	S	S	S		S			S	S	S		S
063236	2006	CANINE	DALMATIAN	FEMALE SPAYED	skin	10	26	6		S	R	S	S		S			S	S	I		R		S	S				POS	Type 4a	Clinical	No	No		S	R	R	S	S		S			S	S	R		R
061521	2006	CANINE			ear	24	34	31		S	S	S	S		S			S	S	S		S		S	S				0		Referral	No	No		S	S	S	S	S		S			S	S	S		S
074979	2007	CANINE			skin	9	24	16		S	R	S	S		S			S	S	S		R		R	R					mec+, no band	Referral				S	R	R	S	S		S			S	S	S		R
83635	2008	CANINE			ear	15	31	20		S	R	S	S		S			S	R	S		R		S	S						Referral				S	R	R	S	S		S			S	R	S		R
85156	2008	CANINE			urine	8	28	17		S	R	S	S		S			S	S	S		R		S	S						Referral				S	R	R	S	S		S			S	S	S		R
85711	2008	CANINE			urine	6	18			R	R	R	S		R			R	S	R		R		R	R						Referral				R	R		R	S		R			R	S	R		R
092452	2009	CANINE			skin	14	31	30		S	R	S	S	S	S			S	S			R		S	S	0.5				Neg	Referral				S	R	S	S	S	S	S			S	S			R
093691	2009	CANINE	MIXED BREED DOG	MALE CASTRATED	skin	6	18	6		R	R	R	S		S			S	R	R		R		S	S					POS	Clinical				R	R	R	R	S		S			S	R	R		R
060697b	2006	CANINE			ear	24	34	32		S	R	S	S		S			S	S	S		R		R	S				44.05		Referral	No	No		S	R	S	S	S		S			S	S	S		R
060697c	2006	CANINE			ear	13	27	15		S	R	S	S		R			R	S	R		R		R	R		6		POS	Type 5 (368 bp)	Referral	No	No		S	R	R	S	S		R			R	S	R		R
091793	2009	CANINE			ear	21				S	S	S	S		S			S	S	S		S		S	S						Referral				S	S		S	S		S			S	S	S		S
092865	2009	CANINE			skin	18	34	29		S	R	S	S		S			S	S	S		R		R	S						Referral				S	R	S	S	S		S			S	S	S		R
094132	2009	CANINE			ear	18	33	30		S	R	S	S		S			S	S	S		R		R	S						Referral				S	R	S	S	S		S			S	S	S		R
064888	2006	CANINE	STAFFORDSHIRE TERRIER	MALE CASTRATED	skin	15	28	17		S	R	S	S		R			R	S	R		R		R	R		3			Type 5	Clinical	No	No		S	R	R	S	S		R			R	S	R		R
073599	2007	CANINE	STAFFORDSHIRE TERRIER	MALE CASTRATED	skin	13	26	16		S	R	S	S		S			S	S	S		R		R	R					mec+, no band	Clinical				S	R	R	S	S		S			S	S	S		R
062250a	2006	CANINE			urine	25	35	32		S	S	S	S		S			S	S	S		S		S	S				37.7		Referral	No	No		S	S	S	S	S		S			S	S	S		S
071749	2007	CANINE			urine	26	32	32		S	R	S	S		S			S	S	S		R		R	R						Referral				S	R	S	S	S		S			S	S	S		R
071845	2007	CANINE	MIXED BREED DOG	FEMALE SPAYED	skin	23	32	29		S	S	S	S		S			S	S	S		S		S	S						Clinical				S	S	S	S	S		S			S	S	S		S
075402a	2007	CANINE	MIXED BREED DOG	FEMALE SPAYED	skin	6	20	7		S	R	S	S		R			R	I	R		R		R	R					mec+, Type 5	Clinical				S	R	R	S	S		R			R	R	R		R
075403	2007	CANINE	MIXED BREED DOG	FEMALE SPAYED	ear	12	21	14		S	R	S	S		R			R	I	R		R		R	R					mec+, Type 5	Clinical				S	R	R	S	S		R			R	R	R		R
80116	2008	CANINE	MIXED BREED DOG	FEMALE SPAYED	skin	6	22	10		S	R	S	S		R			R	S	R		R		R	R					mec+, Type 5	Clinical				S	R	R	S	S		R			R	S	R		R
072568	2007	CANINE	DACHSHUND	FEMALE SPAYED	skin	23	34	28		S	R	S	S		S			S	S	S		R		R	I						Clinical				S	R	S	S	S		S			S	S	S		R
091994	2009	CANINE	MIXED BREED DOG	FEMALE SPAYED	skin	11	26	17		S	R	S	S		S			S	S	S		R		R	I					POS	Clinical				S	R	R	S	S		S			S	S	S		R
064219	2006	CANINE	BULLMASTIFF	MALE CASTRATED	skin	25	38	34		S	R	S	S		S			S	S	S		R		S	S					0	Referral	No	No		S	R	S	S	S		S			S	S	S		R
81636	2008	CANINE	GREAT DANE	FEMALE SPAYED	skin	6	18	6		R	R	R	S		R			R	I	R		R		R	R					mec+, Type 5	Clinical				R	R	R	R	S		R			R	R	R		R
092397	2009	CANINE			ear	22	32	28		S	S	S	S		S			S	S	S		S		S	S						Referral				S	S	S	S	S		S			S	S	S		S
073260	2007	CANINE	STAFFORDSHIRE TERRIER	FEMALE SPAYED	ear	24	36	32		S	R	S	S		S			S	S	S		R		S	S						Referral				S	R	S	S	S		S			S	S	S		R
073260	2007	CANINE	STAFFORDSHIRE TERRIER	FEMALE SPAYED	ear	24	31	>30		S	S	S	S		S			S	S	S		S		S	S						Referral				S	S	S	S	S		S			S	S	S		S
84330	2008	CANINE			skin	19	>30	>30		S	R	S	S		R			R	S	R		R		R	R						Referral				S	R	S	S	S		R			R	S	R		R
072712	2007	CANINE	BORDEAUX	MALE CASTRATED	skin	6	23	11		S	R	S	S		R			R	I	R		R		R	R					mec+, Type 5	Clinical				S	R	R	S	S		R			R	R	R		R
074642	2007	CANINE	MIXED BREED DOG	FEMALE SPAYED	skin	25	34	30		S	S	S	S		S			S	S	S		S		R	S						Referral				S	S	S	S	S		S			S	S	S		S
074813	2007	CANINE	BEAGLE	FEMALE	skin	23	32	27		S	S	S	S		S			S	S	S		S		S	S						Clinical				S	S	S	S	S		S			S	S	S		S
094241	2009	CANINE			skin	23	33	30		S	S	S	S		S			S	S	S		S		S	S						Referral				S	S	S	S	S		S			S	S	S		S
82567	2008	CANINE	BEAGLE	MALE CASTRATED	ear	21	34	29		S		S	S		S			S	S	S		R		R	S					0, no band	Referral				S		S	S	S		S			S	S	S		R
071447	2007	CANINE	GOLDEN RETRIEVER	MALE CASTRATED	skin	8	25	12		S	R	S	S		R			R	S	R		R		R	R					0, no band*	Clinical				S	R	R	S	S		R			R	S	R		R
060020	2006	CANINE	MIXED BREED DOG	FEMALE SPAYED	ttw	22	37	33		S	R	S	S		S			S	S	S		R		S	S				43.84		Clinical	No	No		S	R	S	S	S		S			S	S	S		R
075005	2007	CANINE	MINIATURE POODLE	MALE CASTRATED	nasal	6	20	10		R	R	S	S		R			R	I	R		R		R	R					mec+, Type 5	Clinical				R	R	R	S	S		R			R	R	R		R
091886b	2009	CANINE			urine	24	35	19		S	S	S	S		S			S	S	S		S		S	S						Referral				S	S	R	S	S		S			S	S	S		S
091886c	2009	CANINE			urine	6	12	6		S	S	S	S		R			S	S	I		R		S	S					Neg	Referral				S	S	R	S	S		R			S	S	R		R
80978	2008	CANINE			urine	27	34	30		S	S	S	S		S			S	R	S		S		S	S					0, no band	Referral				S	S	S	S	S		S			S	R	S		S
092239	2009	CANINE			skin	14	24	23		S	R	S	S		S			S	S	S		R		S	S						Referral				S	R	S	S	S		S			S	S	S		R
070422	2007	CANINE	ENGLISH BULLDOG	MALE CASTRATED	skin	21	33	29		S	R	S	S		S			S	S	S		R		R	S						Clinical				S	R	S	S	S		S			S	S	S		R
062995	2006	CANINE	PEMBROKE WELSH CORGI	MALE	bone	22	34	32		S	R	S	S		R			R	S	S		R		S	S				38.2		Referral	No	No		S	R	S	S	S		R			R	S	S		R
071875	2007	CANINE	MIXED BREED DOG	FEMALE SPAYED	urine	24	37	34		S	R	S	S		R			R	S	S		R		S	S						Clinical				S	R	S	S	S		R			R	S	S		R
094418	2009	CANINE	LHASA APSO	MALE CASTRATED	ear	22	35	29		S	R	S	S		S			S	S	S		R		S	S						Clinical				S	R	S	S	S		S			S	S	S		R
090452	2009	CANINE			urine	24	34			S	R	S	S		S			S	S	S		R		R	S					Neg	Referral				S	R		S	S		S			S	S	S		R
85864	2008	CANINE			skin	19	33			S	R	S	S		S			S	S	S		R		R	I						Referral				S	R		S	S		S			S	S	S		R
060376	2006	CANINE			ear	25	38	34		S	R	S	S		S			S	S	S		R		S	S				0		Referral	No	No		S	R	S	S	S		S			S	S	S		R
060694	2006	CANINE	COCKER SPANIEL	FEMALE SPAYED	ear	14	28	18		S	R	S	S		R			R	S	R		R		R	R		2		POS	Type 5 (376 bp)	Clinical	No	No		S	R	R	S	S		R			R	S	R		R
060704	2006	CANINE	COCKER SPANIEL	FEMALE SPAYED	ear	15	28	18		S	R	S	S		R			R	S	R		R		R	R		2		29.79	Type 5 (361 bp)	Clinical	No	No		S	R	R	S	S		R			R	S	R		R
85626	2008	CANINE			skin	18	35			S	R	S	S		R			R	R	S		R		R	R						Referral				S	R		S	S		R			R	R	S		R
83416	2008	CANINE	BASSET HOUND	MALE CASTRATED	skin	7	22	10	S	S	R	S	S		R	I		R	S	R	I	R	S	R	R						Clinical			S	S	R	R	S	S		R	R		R	S	R	R	R	S
80826	2008	CANINE	CHESAPEAKE BAY RETRIEVER	MALE CASTRATED	skin	23	34	31		S	R	S	S		S			S	S	S		R		S	S						Clinical				S	R	S	S	S		S			S	S	S		R
091060	2009	CANINE	PUG	MALE CASTRATED	ear	21	32	26		S	S	S	S		S			S	S	S		S		S	S						Clinical				S	S	S	S	S		S			S	S	S		S
062510	2006	CANINE	STANDARD POODLE	MALE CASTRATED	ear	18	33	23		S	R	S	S		S			S	S	I		R		S	S				POS	Type 3	Clinical	No	No		S	R	S	S	S		S			S	S	R		R
092731	2009	CANINE			skin	15	31	28		S	R	S	S	S	I			S	S			R		R	I					Neg	Referral				S	R	S	S	S	S	R			S	S			R
070681	2007	CANINE	AUSTRALIAN CATTLE DOG	FEMALE SPAYED	ear	10	30	10		S	R	S	S		S			S	S	R		R		S	S					mec+, Type 3	Clinical				S	R	R	S	S		S			S	S	R		R
070188	2007	CANINE			skin	21	35	31		S	R	S	S		S			S	S	S		R		S	S					Neg	Referral				S	R	S	S	S		S			S	S	S		R
094494	2009	CANINE			skin	23	36	31		S	R	S	S		R			R	R	S		R		R	R						Referral				S	R	S	S	S		R			R	R	S		R
82925	2008	CANINE			skin	23	29	25		S	S	S	S		S			S	S	S		S		S	S					0,	Referral				S	S	S	S	S		S			S	S	S		S
075550	2007	CANINE	GERMAN SHEPHERD DOG	MALE CASTRATED	nasal	6	20	6		R	R	S	S		R			R	I	R		R		R	R					mec+, Type 5	Clinical				R	R	R	S	S		R			R	R	R		R
85463b	2008	CANINE	COCKER SPANIEL	MALE CASTRATED	skin	10	25		S	S	R	S	S		R	I		R	S	R	I	R	S	R	R						Clinical			S	S	R		S	S		R	R		R	S	R	R	R	S
85463c	2008	CANINE	COCKER SPANIEL	MALE CASTRATED	skin	17	34			S	R	S	S		S			S	I	S		R		S	S						Clinical				S	R		S	S		S			S	R	S		R
80267	2008	CANINE	MIXED BREED DOG	FEMALE SPAYED	skin	26	38	32		S	R	S	S		S			S	S	S		R		R	R						Clinical				S	R	S	S	S		S			S	S	S		R
064437	2006	CANINE	MIXED BREED DOG	MALE CASTRATED	skin	24	37	34		S	R	S	S		S			S	S	S		R		S	S					0	Clinical	No	No		S	R	S	S	S		S			S	S	S		R
094279	2009	CANINE			ear	6	26	16	S	S	R	S	S		I	I		S	I	R	R	R	S	R	R					POS	Referral			S	S	R	R	S	S		R	R		S	R	R	R	R	S
075177	2007	CANINE			ear	25	31	26		S	S	S	S		S			S	S	S		S		S	S						Referral				S	S	S	S	S		S			S	S	S		S
073650	2007	CANINE	MIXED BREED DOG	FEMALE SPAYED	skin	6	21	10		S	R	S	S		R			R	I	R		R		R	R						Clinical				S	R	R	S	S		R			R	R	R		R
81364	2008	CANINE			skin	20	34	32		S	R	S	S		S			S	S	S		R		R	R						Referral				S	R	S	S	S		S			S	S	S		R
063958	2006	CANINE			skin	22	35	32		S	R	S	S		S			S	S	S		R		S	S					0	Referral	No	No		S	R	S	S	S		S			S	S	S		R
075141	2007	CANINE	MIXED BREED DOG	FEMALE SPAYED	skin	23	35	30		S	R	S	S		S			S	S	S		R		S	S						Clinical				S	R	S	S	S		S			S	S	S		R
065276	2006	CANINE			nasal	6	23	6		S	R	S	S		R			R	I	R		R		R	R		>256			Type 5	Referral	No	No		S	R	R	S	S		R			R	R	R		R
80944	2008	CANINE	GOLDEN RETRIEVER	FEMALE SPAYED	skin	20	34	30		S	R	S	S		S			S	S	S		R		R	S						Clinical				S	R	S	S	S		S			S	S	S		R
80103	2008	CANINE	GERMAN SHEPHERD DOG	MALE CASTRATED	skin	21	34	29		S	R	S	S		S			S	S	S		R		R	R						Clinical				S	R	S	S	S		S			S	S	S		R
85504	2008	CANINE	GERMAN SHEPHERD DOG	MALE CASTRATED	skin	19	34			S	R	S	S		S			S	S	S		R		S	S						Clinical				S	R		S	S		S			S	S	S		R
090469	2009	CANINE	GERMAN SHEPHERD DOG	MALE CASTRATED	skin	12	26		S	S	R	S	S		R	I		R	S	R	I	R	S	R	R					POS	Clinical			S	S	R		S	S		R	R		R	S	R	R	R	S
075156	2007	CANINE	YORKSHIRE TERRIER	MALE	skin	22	34	28		S	R	S	S		S			S	S	S		R		S	S						Clinical				S	R	S	S	S		S			S	S	S		R
091699b	2009	CANINE			skin	8	24	13		S	R	S	S		R			R	R	R		R		R	R					POS	Referral				S	R	R	S	S		R			R	R	R		R
091699c	2009	CANINE			skin	6	28	6		S	R	S	S		S			S	R	S		R		S	S					POS	Referral				S	R	R	S	S		S			S	R	S		R
094576	2009	CANINE	MIXED BREED DOG	MALE CASTRATED	nasal	21	33	29		S	R	S	S		S			S	S	S		R		S	S						Clinical				S	R	S	S	S		S			S	S	S		R
076137	2007	CANINE	MIXED BREED DOG	FEMALE SPAYED	urine	23	36	28		S	R	S	S		S		S	S	S			R		R	S						Referral				S	R	S	S	S		S		S	S	S			R
81884	2008	CANINE			joint	6	9	6		R	R	S	S		R			R	S	R		R		S	S					mec+, Type 2	Referral				R	R	R	S	S		R			R	S	R		R
075918	2007	CANINE	YORKSHIRE TERRIER	MALE CASTRATED	urine	20	35	30		S	R	S	S		S			S	S	S		R		S	S						Clinical				S	R	S	S	S		S			S	S	S		R
83000	2008	CANINE	COCKER SPANIEL	FEMALE SPAYED	urine	22	32	28		S	S	S	S		S			S	R	R		S		S	S						Referral				S	S	S	S	S		S			S	R	R		S
070173	2007	CANINE	COCKER SPANIEL	MALE CASTRATED	ear	6	22	10		S	R	S	S		R			R	I	R		R		R	R					mec+, Type 5	Clinical				S	R	R	S	S		R			R	R	R		R
071641	2007	CANINE	COCKER SPANIEL	MALE CASTRATED	ear	6	22	10		S	R	S	S		R		R	R	S	R		R		R	R					mec+, Type 5	Clinical				S	R	R	S	S		R		R	R	S	R		R
81058	2008	CANINE	GOLDEN RETRIEVER	MALE CASTRATED	skin	23	36	31		S	R	S	S		S			S	S	S		R		S	S						Clinical				S	R	S	S	S		S			S	S	S		R
82133	2008	CANINE			skin	10	25	15		S		S	S		R			R	S	S		R		R	R					mec+, no band	Referral				S		R	S	S		R			R	S	S		R
093789	2009	CANINE	GREYHOUND	MALE CASTRATED	skin	16	34	29		S	R	S	S	S	S			S	S	S		R	S	S	S	=0.25					Clinical				S	R	S	S	S	S	S			S	S	S		R	S
061321	2006	CANINE			joint	24	28	25		S	R	S	S		S			S	S	S		R		S	S				39.28		Referral	No	No		S	R	S	S	S		S			S	S	S		R
092387	2009	CANINE			nasal	20	36	31		S	R	S	S		S			S	R	S		R		R	R						Referral				S	R	S	S	S		S			S	R	S		R
84118	2008	CANINE			ear	23	32	28		S	S	S	S		S			S	S	S		S		S	S						Referral				S	S	S	S	S		S			S	S	S		S
094500	2009	CANINE	CAVALIER KING CHARLES SPANIEL	MALE CASTRATED	skin	22	34	30		S	R	S	S		S			S	S	S		R		S	S						Clinical				S	R	S	S	S		S			S	S	S		R
074753a	2007	CANINE	MIXED BREED DOG	FEMALE SPAYED	skin	22	32	28		S	R	S	S		S			S	S	S		R		R	I						Clinical				S	R	S	S	S		S			S	S	S		R
074753b	2007	CANINE	MIXED BREED DOG	FEMALE SPAYED	skin	21	34	30		S	R	S	S		S			S	S	S		R		R	S						Clinical				S	R	S	S	S		S			S	S	S		R
075289	2007	CANINE	MIXED BREED DOG	FEMALE SPAYED	skin	21	35	30		S	R	S	S		S			S	S	S		R		R	I						Clinical				S	R	S	S	S		S			S	S	S		R
076135	2007	CANINE	COONHOUND,BLACK & TAN	MALE	peritoneal	22	36	32		S	R	S	S		S		S	S	S			R		R	S						Clinical				S	R	S	S	S		S		S	S	S			R
076159	2007	CANINE	COONHOUND,BLACK & TAN	MALE	spleen	20	33	29		S	R	S	S		S		S	S	S			R		R	S						Clinical				S	R	S	S	S		S		S	S	S			R
091926	2009	CANINE			urine	21	33	27		S	S	S	S		S			S	S	S		S		S	S						Referral				S	S	S	S	S		S			S	S	S		S
80150	2008	CANINE	ROTTWEILER	FEMALE SPAYED	ear	20	33	29		S	R	S	S		S			S	I	S		R		R	R						Clinical				S	R	S	S	S		S			S	R	S		R
80150	2008	CANINE	ROTTWEILER	FEMALE SPAYED	ear	26	31	28		S	S	S	S		S			S	R	S		S		S	S						Clinical				S	S	S	S	S		S			S	R	S		S
83963	2008	CANINE	ROTTWEILER	FEMALE SPAYED	skin	21	32	30		S	S	S	S		S			S	S	S		S		S	S						Clinical				S	S	S	S	S		S			S	S	S		S
090769	2009	CANINE	MIXED BREED DOG	FEMALE SPAYED	skin	18	36			S	R	S	S		S			S	S	S		R		S	S						Clinical				S	R		S	S		S			S	S	S		R
82080	2008	CANINE			nasal	25	34	29		S	S	S	S		S			S	S	S		S		R	S						Referral				S	S	S	S	S		S			S	S	S		S
090405	2009	CANINE	IRISH WOLFHOUND	FEMALE	skin	6	20		S	S	R	S	S		R	I		R	S	R	I	R	S	R	R					POS	Clinical			S	S	R		S	S		R	R		R	S	R	R	R	S
090250	2009	CANINE	MIXED BREED DOG	FEMALE SPAYED	urine	20	36			S	R	S	S		S			S	S	S		R		S	S					Neg	Clinical				S	R		S	S		S			S	S	S		R
83699	2008	CANINE	GOLDEN RETRIEVER	FEMALE SPAYED	peritoneal	26	34	30		S	S	S	S		S			S	S	S		S		R	R						Referral				S	S	S	S	S		S			S	S	S		S
094508	2009	CANINE	BEAGLE	FEMALE SPAYED	skin	20	34	29		S	R	S	S		S			S	S	S		R		S	S						Referral				S	R	S	S	S		S			S	S	S		R
80528	2008	CANINE			joint	22	27	24		S	R	S	S		S			S	S	S		R		S	S						Referral				S	R	S	S	S		S			S	S	S		R
090655c	2009	CANINE			skin	13	29			S	S	S	S		S			S	I	I		S		S	S					POS	Referral				S	S		S	S		S			S	R	R		S
090655d	2009	CANINE			skin	6	23			S	R	S	S		S			S	I	R		R		R	R					POS	Referral				S	R		S	S		S			S	R	R		R
094022	2009	CANINE	LABRADOR RETRIEVER	FEMALE SPAYED	skin	16	33	30		S	R	S	S	S	S			S	S	S		R	S	S	S	=0.25				Neg	Clinical				S	R	S	S	S	S	S			S	S	S		R	S
074806	2007	CANINE	POMERANIAN	MALE CASTRATED	skin	22	33	30		S	R	S	S		S			S	S	S		R		S	S						Clinical				S	R	S	S	S		S			S	S	S		R
062732	2006	CANINE			skin	22	34	31		S	R	S	S		S			S	S	S		R		S	S				38.63		Referral	No	No		S	R	S	S	S		S			S	S	S		R
060255	2006	CANINE	GOLDEN RETRIEVER	FEMALE SPAYED	skin	16	25	19		S	R	S	S		R			R	S	R		R		R	R		2		28.79	Type 5 (339 bp)	Clinical	No	No		S	R	R	S	S		R			R	S	R		R
071894	2007	CANINE			skin	14	30	18		S	R	S	S		S			S	R	I		R		S	S					mec+, Type 3	Referral				S	R	R	S	S		S			S	R	R		R
094658	2009	CANINE	GERMAN SHEPHERD DOG	MALE CASTRATED	LN	18	32	27		S	R	S	S		S			S	S	S		R		S	S						Clinical				S	R	S	S	S		S			S	S	S		R
80140	2008	CANINE			skin	19	25	24		S	R	S	S		S			S	S	S		R		S	S						Referral				S	R	S	S	S		S			S	S	S		R
094133	2009	CANINE		MALE	ear	21	34	29		S	R	S	S		S			S	S	S		R		R	S						Referral				S	R	S	S	S		S			S	S	S		R
094171	2009	CANINE			skin	6	26	6		S	R	S	S		S			S	I	R		R		S	S					POS	Referral				S	R	R	S	S		S			S	R	R		R
076031	2007	CANINE	LABRADOR RETRIEVER	MALE CASTRATED	ear	8	21	10		S	R	S	S		R			R	I	R		R		R	R					mec+, Type 5	Referral				S	R	R	S	S		R			R	R	R		R
84814	2008	CANINE	AUSTRALIAN CATTLE DOG	MALE	bone	18	32	29		S	R	S	S	S	S			S	S	S		R		S	S						Referral				S	R	S	S	S	S	S			S	S	S		R
090647	2009	CANINE	MIXED BREED DOG	FEMALE SPAYED	skin	23	33			S	S	S	S		S			S	S	S		S		S	S						Referral				S	S		S	S		S			S	S	S		S
065273	2006	CANINE			urine	21	32	30		S	R	S	S		S			S	S	S		R		R	I		0.38			0	Referral	No	No		S	R	S	S	S		S			S	S	S		R
072239	2007	CANINE			skin	24	36	31		S	R	S	S		R			R	S	S		R		S	S						Referral				S	R	S	S	S		R			R	S	S		R
84748	2008	CANINE			skin	23	33	30		S	S	S	S		S			S	S	S		S		S	S						Referral				S	S	S	S	S		S			S	S	S		S
090490	2009	CANINE	MIXED BREED DOG	MALE CASTRATED	joint	13	25		S	S	R	S	I		R	S		R	S	S	S	R	S	S	S						Clinical			S	S	R		S	R		R	S		R	S	S	S	R	S
091934	2009	CANINE	MIXED BREED DOG	MALE CASTRATED	joint	17	24	15		S	S	S	S		R			R	S	S		R		S	S						Clinical				S	S	R	S	S		R			R	S	S		R
82741	2008	CANINE	GERMAN SHEPHERD DOG	MALE CASTRATED	joint	20	33	30		S	R	S	S		S			S	S	S		R		R	R					0, no band	Referral				S	R	S	S	S		S			S	S	S		R
84090	2008	CANINE	GERMAN SHEPHERD DOG	MALE CASTRATED	joint	18	33	28		S	R	S	S		S			S	S	S		R		R	R						Referral				S	R	S	S	S		S			S	S	S		R
076192	2007	CANINE	SHIH TZU	MALE CASTRATED	skin	6	22	6		S	R	S	S		S		I	S	S			R		S	S					mec+, Type 3	Clinical				S	R	R	S	S		S		R	S	S			R
80508	2008	CANINE			skin	20	34	30		S	R	S	S		S			S	S	S		R		S	S						Referral				S	R	S	S	S		S			S	S	S		R
090925	2009	CANINE			skin	21	34	20		S	R	S	S		S			S	S	S		R		S	S						Referral				S	R	R	S	S		S			S	S	S		R
062041	2006	CANINE			ear	18	30	25		S	R	S	S		S			S	S	S		R		R	S		0.125		Neg	0 bp	Referral	No	No		S	R	S	S	S		S			S	S	S		R
84783	2008	CANINE			skin	6	26	6		S	R	S	S		S			S	I	R		R		S	S						Referral				S	R	R	S	S		S			S	R	R		R
85401	2008	CANINE	COCKER SPANIEL	MALE CASTRATED	ear	6	28			S	R	S	S		S			S	S	S		R		S	S						Referral				S	R		S	S		S			S	S	S		R
073392	2007	CANINE			skin	22	34	29		S	R	S	S		S			S	S	S		R		S	S						Referral				S	R	S	S	S		S			S	S	S		R
80549	2008	CANINE			joint	22	33	29		S	R	S	S		S			S	S	S		R		S	S						Referral				S	R	S	S	S		S			S	S	S		R
076214	2007	CANINE	BOXER	MALE CASTRATED	joint	21	34	30		S	R	S	S		S			S	S	S		R		S	S						Referral				S	R	S	S	S		S			S	S	S		R
82208	2008	CANINE	BOXER	MALE CASTRATED	joint	22	36	27		S		S	S		S			S	S	S		R		S	S					0, no band	Referral				S		S	S	S		S			S	S	S		R
075384	2007	CANINE			skin	6	27	6		S	R	S	S		S			S	R	R		R		S	S					0, no band	Referral				S	R	R	S	S		S			S	R	R		R
82052	2008	CANINE			skin	21	34	29		S	R	S	S		R			R	S	S		R		S	R					0, no band	Referral				S	R	S	S	S		R			R	S	S		R
091368	2009	CANINE	LABRADOR RETRIEVER	FEMALE SPAYED	skin	19	33	29		S	R	S	S		S			S	S	S		R		R	R					Neg	Referral				S	R	S	S	S		S			S	S	S		R
81201	2008	CANINE			ear	24	34	30		S	S	S	S		S			S	S	S		S		S	S						Referral				S	S	S	S	S		S			S	S	S		S
092160	2009	CANINE			joint	16	27	16		S	R	S	S		S			S	S	S		R		S	S						Referral				S	R	R	S	S		S			S	S	S		R
093403	2009	CANINE			joint	17	26	22		S	R	S	S	I	S			S	S	S		R		S	S						Referral				S	R	S	S	S	R	S			S	S	S		R
090499	2009	CANINE			nasal	18	32			S	R	S	S		S			S	S	S		R		S	S					Neg	Referral				S	R		S	S		S			S	S	S		R
060179	2006	CANINE			skin	19	36	30		S	R	S	S		S			S	S	S		R		S	S		0.38		0		Referral	No	No		S	R	S	S	S		S			S	S	S		R
060484	2006	CANINE	SCOTTISH TERRIER	MALE CASTRATED	skin	25	37	28		S	S	S	S		R			R	S	R		S		S	S				38.2		Clinical	No	No		S	S	S	S	S		R			R	S	R		S
061041	2006	CANINE	SCOTTISH TERRIER	MALE CASTRATED	skin	6	25	6		S	R	S	S		R			R	R	R		R		R	R		>256		29.42	Type 5 (384 bp)	Clinical	No	No		S	R	R	S	S		R			R	R	R		R
061999	2006	CANINE	SCOTTISH TERRIER	MALE CASTRATED	skin	25	34	30		S	S	S	S		R			R	S	R		S		S	S				35.5	All repeated mecA results are neg	Clinical	No	No		S	S	S	S	S		R			R	S	R		S
062340	2006	CANINE			bone	16	28	18		S	R	S	S		R			R	S	R		R		R	R		2		26.93	Type 5	Referral	No	No		S	R	R	S	S		R			R	S	R		R
062415	2006	CANINE	YORKSHIRE TERRIER	FEMALE SPAYED	skin	13	25	15		S	R	S	S		R			R	S	R		R		R	R		128		27.77	Type 5	Clinical	No	No		S	R	R	S	S		R			R	S	R		R
063304	2006	CANINE			ear	27	34	32		S	S	S	S		S			S	S	R		S		S	S				Neg		Referral	No	No		S	S	S	S	S		S			S	S	R		S
063982	2006	CANINE	YORKSHIRE TERRIER	FEMALE SPAYED	skin	6	23	9		S	R	S	S		R			R	I	R		R		R	R		>256			Type 5	Clinical	No	No		S	R	R	S	S		R			R	R	R		R
064791	2006	CANINE	YORKSHIRE TERRIER	FEMALE SPAYED	skin	10	24	14		S	R	S	S		R			R	I	R		R		R	R					Type 5	Clinical	No	No		S	R	R	S	S		R			R	R	R		R
064981	2006	CANINE			ear	28	37	>30		S	S	S	S		S			S	S	S		S		S	S				Neg		Referral	No	No		S	S	S	S	S		S			S	S	S		S
073679a	2007	CANINE	BASSET HOUND	FEMALE SPAYED	ear	21	29	23		S	S	S	S		S			S	S	S		S		S	S						Clinical				S	S	S	S	S		S			S	S	S		S
073679b	2007	CANINE	BASSET HOUND	FEMALE SPAYED	ear	6	22	9		S	R	S	S		R			R	I	R		R		R	R					mec+, Type 5	Clinical				S	R	R	S	S		R			R	R	R		R
075455	2007	CANINE			urine	21	32	30		S	R	S	S		S			S	S	S		R		S	S						Referral				S	R	S	S	S		S			S	S	S		R
81099	2008	CANINE	MINIATURE SCHNAUZER 20-30LBS	MALE	skin	6	23	6	S	S	R	S	R		R	I		R	R	R		R	S	R	R					0, no band	Clinical			S	S	R	R	S	R		R	R		R	R	R		R	S
82544	2008	CANINE	DACHSHUND	FEMALE SPAYED	skin	21	33	30		S		S	S		R			R	S	S		R		S	S					0, no band	Clinical				S		S	S	S		R			R	S	S		R
83826	2008	CANINE	DACHSHUND	FEMALE SPAYED	urine	24	35	32		S	S	S	S		S			S	S	S		S		S	S						Clinical				S	S	S	S	S		S			S	S	S		S
092895	2009	CANINE	MIXED BREED DOG	MALE CASTRATED	nasal	20	35	29		S	S	S	S		S			S	S	R		S		S	S						Clinical				S	S	S	S	S		S			S	S	R		S
093423	2009	CANINE	CANINE UNASSIGNED	MALE	skin	14	24	17	S	S	R	S	S		R	I		R	S	S	I	R	S	R	S					POS	Clinical			S	S	R	R	S	S		R	R		R	S	S	R	R	S
093491	2009	CANINE	YORKSHIRE TERRIER	FEMALE	urine	19	33	27		S	R	S	S		S			S	S	S		R		S	S						Clinical				S	R	S	S	S		S			S	S	S		R
094602	2009	CANINE	CANINE UNASSIGNED	MALE	skin	11	24	16	S	S	R	S	R		R	I		R	R	R	R	R	S	R	R					POS	Clinical			S	S	R	R	S	R		R	R		R	R	R	R	R	S
82782	2008	CANINE			ear	25	33	30		S	S	S	S		S			S	S	S		S		S	S					0,	Referral				S	S	S	S	S		S			S	S	S		S
82377	2008	CANINE	ROTTWEILER	FEMALE SPAYED	eye	24	31	26		S		S	S	S	S			S	S	S		S		S	S					0, no band	Referral				S		S	S	S	S	S			S	S	S		S
070181	2007	CANINE			urine	24	35	29		S	R	S	S		S			S	S	S		R		S	S					Neg	Referral				S	R	S	S	S		S			S	S	S		R
070870	2007	CANINE			urine	25	36	32		S	R	S	S		S			S	S	S		R		S	S						Referral				S	R	S	S	S		S			S	S	S		R
075398	2007	CANINE			urine	20	32	27		S	R	S	S		S			S	S	S		R		S	S						Referral				S	R	S	S	S		S			S	S	S		R
81389	2008	CANINE			joint	21	27	28		S	R	S	S		S			S	S	S		R		S	S						Referral				S	R	S	S	S		S			S	S	S		R
062121	2006	CANINE	MIXED BREED DOG	FEMALE SPAYED	joint	26	35	29		S	S	S	S		S			S	S	S		S		S	S				36.5		Clinical	No	No		S	S	S	S	S		S			S	S	S		S
070507	2007	CANINE	MIXED BREED DOG	FEMALE SPAYED	skin	27	35	32		S	S	S	S		S			S	S	S		S		S	S						Clinical				S	S	S	S	S		S			S	S	S		S
83887	2008	CANINE	GREAT PYRENEES	FEMALE SPAYED	skin	17	32	29		S	R	S	S		S			S	S	S		R		S	S						Clinical				S	R	S	S	S		S			S	S	S		R
094553	2009	CANINE	GOLDEN RETRIEVER	FEMALE SPAYED	skin	21	36	31	S	S	R	S	S		I	I		R	S	S	R	R	S	R	S						Clinical			S	S	R	S	S	S		R	R		R	S	S	R	R	S
84233	2008	CANINE	SIBERIAN HUSKY	FEMALE SPAYED	ear	19	32	29		S	R	S	S		S			S	S	S		R		S	S						Clinical				S	R	S	S	S		S			S	S	S		R
091773	2009	CANINE	GOLDEN RETRIEVER	MALE CASTRATED	skin	19	35	31		S	R	S	S		S			S	S	S		R		R	S						Referral				S	R	S	S	S		S			S	S	S		R
83315	2008	CANINE			skin	19	34	29		S	R	S	S		S			S	S	S		R		S	S						Referral				S	R	S	S	S		S			S	S	S		R
81855	2008	CANINE			ear	12	25	14	S	S	R	S	S		R	I		R	I	R		R	S	R	R					mec+, Type 5	Referral			S	S	R	R	S	S		R	R		R	R	R		R	S
85281	2008	CANINE	GERMAN SHEPHERD DOG	FEMALE SPAYED	skin	26	36	>30		S	S	S	S		S			S	S	S		S		S	S						Clinical				S	S	S	S	S		S			S	S	S		S
060954	2006	CANINE	POINTER	MALE	joint	14	26	17		S	R	S	S		R			R	R	R		R		R	R		128		29.32	Type 5 (376 bp)	Clinical	No	No		S	R	R	S	S		R			R	R	R		R
065599	2006	CANINE			skin	15	29	17		S	R	S	S		R			R	S	R		R		R	R		24			Type 5	Referral	No	No		S	R	R	S	S		R			R	S	R		R
83660	2008	CANINE	SIBERIAN HUSKY	FEMALE SPAYED	urine	24	34	30		S	R	S	S		S			S	S	S		R		S	S						Referral				S	R	S	S	S		S			S	S	S		R
091833	2009	CANINE	BICHON FRISE	FEMALE SPAYED	skin	20	36	31		S	R	S	S		R			R	S	S		R		R	S						Clinical				S	R	S	S	S		R			R	S	S		R
83700	2008	CANINE	GREAT DANE	FEMALE SPAYED	skin	20	32	29		S	R	S	S		S			S	S	S		R		S	I						Referral				S	R	S	S	S		S			S	S	S		R
83700	2008	CANINE	GREAT DANE	FEMALE SPAYED	skin	19	27	24		S	S	S	S		S			S	S	R		S		S	S						Referral				S	S	S	S	S		S			S	S	R		S
060354	2006	CANINE			bone	26	38	30		S	R	S	S		S			S	S	S		R		S	S				0		Referral	No	No		S	R	S	S	S		S			S	S	S		R
094294	2009	CANINE			skin	6	24	11		S	R	S	S		S			S	R	R		R		S	S					POS	Referral				S	R	R	S	S		S			S	R	R		R
092703	2009	CANINE	YORKSHIRE TERRIER	FEMALE SPAYED	skin	21	34	31		S	R	S	S		S			S	S	S		R		S	S					Neg	Clinical				S	R	S	S	S		S			S	S	S		R
84660	2008	CANINE			skin	10	24	14		S	R	S	S		R			R	S	R		R		R	R						Referral				S	R	R	S	S		R			R	S	R		R
071215	2007	CANINE	DACHSHUND	FEMALE	skin	24	32	27		S	S	S	S		S			S	S	S		S		S	S						Clinical				S	S	S	S	S		S			S	S	S		S
090893	2009	CANINE			skin	18	33			S	R	S	S		S			S	S	S		R		R	S						Referral				S	R		S	S		S			S	S	S		R
84106	2008	CANINE	YORKSHIRE TERRIER	FEMALE	skin	23	35	30		S	R	S	S		S			S	S	S		R		R	S						Clinical				S	R	S	S	S		S			S	S	S		R
064388	2006	CANINE	MIXED BREED DOG	FEMALE SPAYED	urine	21	36	30		S	R	S	S		S			S	S	S		R		S	I		0.25			0	Clinical	No	No		S	R	S	S	S		S			S	S	S		R
85462	2008	CANINE	MINIATURE POODLE	FEMALE SPAYED	skin	12	28			S	S	S	S		S			S	S	S		S		S	S						Clinical				S	S		S	S		S			S	S	S		S
090590	2009	CANINE	MINIATURE POODLE	FEMALE SPAYED	ear	11	26			S	R	S	S		S			S	S	S		R		S	S					POS	Clinical				S	R		S	S		S			S	S	S		R
091261	2009	CANINE			skin	24	30	25		S	S	S	S		S			S	S	S		S		S	S					Neg	Referral				S	S	S	S	S		S			S	S	S		S
81942c	2008	CANINE			skin	26	34	30		S	S	S	S		S			S	S	S		S		S	S					0, no band	Referral				S	S	S	S	S		S			S	S	S		S
81942d	2008	CANINE			skin	21	34	28		S	R	S	S		S			S	S	S		R		S	S					0, no band	Referral				S	R	S	S	S		S			S	S	S		R
070733	2007	CANINE	SHIH TZU	FEMALE SPAYED	urine	26	36	30		S	R	S	S		S			S	S	S		R		R	S						Clinical				S	R	S	S	S		S			S	S	S		R
090178	2009	CANINE	ENGLISH BULLDOG	FEMALE SPAYED	skin	6	15			R	R	R	S		S			S	I	R		R		S	S					POS	Clinical				R	R		R	S		S			S	R	R		R
090180	2009	CANINE	ENGLISH BULLDOG	MALE	skin	6	18			R	R	I	S		S			S	R	R		R		S	S					Neg	Referral				R	R		R	S		S			S	R	R		R
073804	2007	CANINE			ear	25	30	25		S	R	S	S		S			S	S	S		R		S	S						Referral				S	R	S	S	S		S			S	S	S		R
075522	2007	CANINE			urine	23	32	28		S	S	S	S		S			S	S	S		S		S	S						Referral				S	S	S	S	S		S			S	S	S		S
81748	2008	CANINE			skin	19	33	28		S	R	S	S		S			S	S	S		R		S	S					0, no band	Referral				S	R	S	S	S		S			S	S	S		R
091883	2009	CANINE	MIXED BREED DOG	MALE CASTRATED	skin	6	21	6	S	S	R	S	S		R	I		R	R	R	I	R	S	R	R					POS	Clinical			S	S	R	R	S	S		R	R		R	R	R	R	R	S
064528	2006	CANINE	SHETLAND SHEEPDOG	MALE	urine	25	34	32		S	R	S	S		S			S	S	S		R		R	S					0	Clinical	No	No		S	R	S	S	S		S			S	S	S		R
060847	2006	CANINE	NEWFOUNDLAND	FEMALE SPAYED	ear	6	23	6		R	R	S	S		S			S	I	R		R		S	S				24.09	1065 bp/ 0	Clinical	No	No		R	R	R	S	S		S			S	R	R		R
061769	2006	CANINE	NEWFOUNDLAND	FEMALE SPAYED	skin	6	25	6		S	R	S	S		S			S	I	R		R		S	S				27.99	Type 3/ ????	Clinical	No	No		S	R	R	S	S		S			S	R	R		R
063187	2006	CANINE	NEWFOUNDLAND	FEMALE SPAYED	skin	14	25	16		S	R	S	S		R			R	I	R		R		R	R		1			Type 5	Clinical	No	No		S	R	R	S	S		R			R	R	R		R
064421	2006	CANINE	NEWFOUNDLAND	FEMALE SPAYED	skin	15	29	23		S	R	S	S		R			R	I	R		R		R	R					Type 5	Clinical	No	No		S	R	S	S	S		R			R	R	R		R
074752	2007	CANINE	NEWFOUNDLAND	FEMALE SPAYED	skin	10	23	12		S	R	S	S		R			R	I	R		R		R	R					mec+, Type 5	Clinical				S	R	R	S	S		R			R	R	R		R
074752	2007	CANINE	NEWFOUNDLAND	FEMALE SPAYED	skin	24	31	27		S	S	S	S		S			S	S	S		S		S	S						Clinical				S	S	S	S	S		S			S	S	S		S
80521	2008	CANINE	NEWFOUNDLAND	FEMALE SPAYED	skin	10	24	12	S	S	R	S	R		R	I		R	S	R		R	S	R	R					mec+, Type 5	Clinical			S	S	R	R	S	R		R	R		R	S	R		R	S
80526	2008	CANINE	NEWFOUNDLAND	FEMALE SPAYED	nasal	23	32	28		S	S	S	S		S			S	S	S		S		S	S						Clinical				S	S	S	S	S		S			S	S	S		S
092699	2009	CANINE			skin	22	32	28		S	S	S	S	S	S			S	S			S		S	S					Neg	Referral				S	S	S	S	S	S	S			S	S			S
093586a	2009	CANINE	SCOTTISH TERRIER	MALE	skin	20	34	30		S	R	S	S		S			S	S	S		R		S	S						Clinical				S	R	S	S	S		S			S	S	S		R
093586c	2009	CANINE	SCOTTISH TERRIER	MALE	skin	20	33	30		S	R	S	S		S			S	S	S		R		R	S						Clinical				S	R	S	S	S		S			S	S	S		R
071539	2007	CANINE	MIXED BREED DOG	FEMALE SPAYED	skin	22	37	32		S	R	S	S		S			S	S	S		R		S	S						Clinical				S	R	S	S	S		S			S	S	S		R
094263	2009	CANINE	GERMAN SHEPHERD DOG	FEMALE SPAYED	joint	19	29	26		S	R	S	S		S			S	S	S		R		S	S						Clinical				S	R	S	S	S		S			S	S	S		R
092210	2009	CANINE	SHIH TZU	FEMALE SPAYED	skin	19	34	30		S	R	S	S		S			S	S	S		R		R	S						Clinical				S	R	S	S	S		S			S	S	S		R
092589	2009	CANINE	SHIH TZU	FEMALE SPAYED	skin	19	36	35		S	R	S	S		S			S	S	S		R		R	S					Neg	Clinical				S	R	S	S	S		S			S	S	S		R
70204	2008	CANINE	COCKER SPANIEL	MALE CASTRATED	skin	20	36	30		S	R	S	S		S			S	S	S		R		S	S						Clinical				S	R	S	S	S		S			S	S	S		R
091894	2009	CANINE	GOLDEN RETRIEVER	FEMALE SPAYED	skin	20	34	29		S	R	S	S		S			S	S	S		R		R	S						Clinical				S	R	S	S	S		S			S	S	S		R
075715	2007	CANINE	GOLDEN RETRIEVER	MALE CASTRATED	skin	23	37	33		S	R	S	S		S			S	S	S		R		R	S						Referral				S	R	S	S	S		S			S	S	S		R
83217	2008	CANINE			skin	6	21	6		S	R	S	S		R			R	S	R		R		R	R						Referral				S	R	R	S	S		R			R	S	R		R
060086	2006	CANINE			ear	22	34	29		S	R	S	S		S			S	S	S		R		S	S				40.68		Referral	No	No		S	R	S	S	S		S			S	S	S		R
060321	2006	CANINE			joint	26	34	27		S	S	S	S		S			S	S	S		S		S	S				40.83		Referral	No	No		S	S	S	S	S		S			S	S	S		S
063228	2006	CANINE	MINIATURE SCHNAUZER 20-30LBS	FEMALE SPAYED	skin	13	26	16		S	R	S	S		R		R	R	S	R		R		R	R		4			Type 5	Clinical	No	No		S	R	R	S	S		R		R	R	S	R		R
063336	2006	CANINE	MINIATURE SCHNAUZER 20-30LBS	FEMALE SPAYED	skin	6	26	8		S	R	S	S		R			R	S	R		R		R	R		>256			Type 5	Clinical	No	No		S	R	R	S	S		R			R	S	R		R
063667	2006	CANINE	MINIATURE SCHNAUZER 20-30LBS	FEMALE SPAYED	skin	14	26	17		S	R	S	S		R			R	S	R		R		R	R					Type 5	Clinical	No	No		S	R	R	S	S		R			R	S	R		R
81295	2008	CANINE	LABRADOR RETRIEVER	FEMALE	skin	21	36	30		S	R	S	S		S			S	S	S		R		R	S						Clinical				S	R	S	S	S		S			S	S	S		R
064860	2006	CANINE	MIXED BREED DOG	FEMALE SPAYED	skin	21	33	30		S	R	S	R		S			S	S	S		R		R	S		0.25			0	Clinical	No	No		S	R	S	S	R		S			S	S	S		R
064861	2006	CANINE	MIXED BREED DOG	FEMALE SPAYED	nasal	21	30	26		S	R	S	R		S			S	S	S		R		S	S				Neg		Clinical	No	No		S	R	S	S	R		S			S	S	S		R
093192	2009	CANINE			skin	18	33	29		S	R	S	S		R			R	I	R		R		R	R						Referral				S	R	S	S	S		R			R	R	R		R
82489	2008	CANINE	MIXED BREED DOG	FEMALE SPAYED	nasal	20	26	22		S		S	S		S			S	S	S		S		S	S					0, no band	Referral				S		S	S	S		S			S	S	S		S
84920	2008	CANINE	WEIMARANER	MALE CASTRATED	skin	9	20	12		S	R	S	S		R			R	S	R		R		R	R						Clinical				S	R	R	S	S		R			R	S	R		R
063789	2006	CANINE			ear	25	32	30		S	S	S	S		S			S	S	S		S		S	I						Referral	No	No		S	S	S	S	S		S			S	S	S		S
85741	2008	CANINE			skin	6	23			R	R	S	S		I			S	I	S		R		S	S						Referral				R	R		S	S		R			S	R	S		R
060815	2006	CANINE	LABRADOR RETRIEVER	MALE	skin	6	23	10		S	R	S	S		R			R	S	R		R		R	R		>256		28.76	Type 5 (339 bp)	Clinical	No	No		S	R	R	S	S		R			R	S	R		R
063476	2006	CANINE	BOSTON TERRIER	FEMALE SPAYED	eye	25	33	31		S	R	S	S	S	S			S	S	S		R		S	S					0	Clinical	No	No		S	R	S	S	S	S	S			S	S	S		R
060083	2006	CANINE	ENGLISH BULLDOG	MALE CASTRATED	ear	15	32	16		S	S	S	S		S			S	S	I		S		S	S				30.11	Type 5	Clinical	No	No		S	S	R	S	S		S			S	S	R		S
84225	2008	CANINE	MIXED BREED DOG	FEMALE SPAYED	skin	6	25	13		S	R	S	S		S			S	R	R		R		S	S						Referral				S	R	R	S	S		S			S	R	R		R
091715	2009	CANINE			ear	21	30	24		S	S	S	S	S	S			S	S	S		S		S	S						Referral				S	S	S	S	S	S	S			S	S	S		S
076191	2007	CANINE	POINTER,GERMAN SHORTHAIRED	FEMALE SPAYED	skin	20	35	30		S	R	S	S		S		S	S	S			R		S	S						Clinical				S	R	S	S	S		S		S	S	S			R
80522	2008	CANINE	MIXED BREED DOG	FEMALE SPAYED	ear	25	36	33		S	S	S	S		S			S	S	S		S		S	S						Clinical				S	S	S	S	S		S			S	S	S		S
80522	2008	CANINE	MIXED BREED DOG	FEMALE SPAYED	ear	15	27	17		S	R	S	S		S			S	R	R		R		S	S					mec+, Type 3	Clinical				S	R	R	S	S		S			S	R	R		R
82752	2008	CANINE	MASTIFF	MALE	tracheal	6	25	6		R	R	I	S		S	I		S	S	S		R		R	S					mec+, Type 3	Clinical				R	R	R	R	S		S	R		S	S	S		R
85242	2008	CANINE			skin	17	32	28		S	R	S	S		S			S	S	S		R		S	S						Referral				S	R	S	S	S		S			S	S	S		R
092143	2009	CANINE	PUG	MALE CASTRATED	skin	6	21	6	S	R	R	S	S		R	I		R	R	R	I	R	S	R	R					POS	Clinical			S	R	R	R	S	S		R	R		R	R	R	R	R	S
093388	2009	CANINE			ear	20	33	28		S	S	S	S		S			S	S	S		S		S	S						Referral				S	S	S	S	S		S			S	S	S		S
093425	2009	CANINE	MIXED BREED DOG	FEMALE SPAYED	skin	6	22	9		S	R	S	S		R			R	I	R		R		R	R					POS	Clinical				S	R	R	S	S		R			R	R	R		R
063668	2006	CANINE	MINIATURE DACHSHUND	UNKNOWN	skin	21	34	31		S	R	S	S		S			S	S	S		R		S	S		0.25			0	Clinical	No	No		S	R	S	S	S		S			S	S	S		R
094065	2009	CANINE			skin	12	27	19		S	R	S	S		R			R	S	S		R		R	R					POS	Referral				S	R	R	S	S		R			R	S	S		R
091922	2009	CANINE	COCKER SPANIEL	FEMALE SPAYED	trach/bronch	9	23	11	S	S	R	S	S		R	R		R	I	R	R	R	S	R	R					POS	Clinical			S	S	R	R	S	S		R	R		R	R	R	R	R	S
84306	2008	CANINE	MIXED BREED DOG	MALE CASTRATED	skin	19	34	31		S	R	S	S		S			S	S	S		R		S	S						Clinical				S	R	S	S	S		S			S	S	S		R
061615	2006	CANINE	BOXER	MALE CASTRATED	blood	22	30	32		S	R	S	S		R			R	S	S		R		S	S				n/a		Clinical	No	No		S	R	S	S	S		R			R	S	S		R
83181	2008	CANINE			skin	23	31	28		S	R	S	S		S			S	S	S		R		S	S						Referral				S	R	S	S	S		S			S	S	S		R
091246	2009	CANINE	MIXED BREED DOG	MALE CASTRATED	skin	18	34	29		S	R	S	S		S			S	S	S		R		S	S						Clinical				S	R	S	S	S		S			S	S	S		R
092356	2009	CANINE	BOXER	MALE	skin	17	30	30		S	R	S	S	S	S			S	S	S		R	S	S	I	0.5				Neg	Clinical				S	R	S	S	S	S	S			S	S	S		R	S
060135	2006	CANINE	AUSTRALIAN CATTLE DOG	FEMALE SPAYED	skin	21	34	30		S	R	S	S		S			S	S	S		R		R	S		0.19		0		Clinical	No	No		S	R	S	S	S		S			S	S	S		R
062147	2006	CANINE			ear	25	33	28		S	S	S	S		S			S	S	S		S		S	I				0		Referral	No	No		S	S	S	S	S		S			S	S	S		S
065526	2006	CANINE	COCKER SPANIEL	FEMALE SPAYED	skin	6	27	6		S	R	S	S		S			S	R	S		R		R	S					Type 3/ faint T.5	Clinical	No	No		S	R	R	S	S		S			S	R	S		R
076026	2007	CANINE	BASENJI	MALE CASTRATED	joint	19	33	29		S	R	S	S	S	S			S	S			R		R	S						Clinical				S	R	S	S	S	S	S			S	S			R
81607	2008	CANINE	BORDER COLLIE	FEMALE SPAYED	nasal	21	34	30		S	R	S	S		S			S	S	S		R		R	S						Clinical				S	R	S	S	S		S			S	S	S		R
091686	2009	CANINE	ROTTWEILER	MALE CASTRATED	skin	18	34	28		S	R	S	S		S			S	S	S		R		S	S					Neg	Clinical				S	R	S	S	S		S			S	S	S		R
092355	2009	CANINE	RHODESIAN RIDGEBACK	FEMALE SPAYED	skin	6	20	6	S	R	R	S	S		R	I		R	I	R	I	R	S	R	R					POS	Clinical			S	R	R	R	S	S		R	R		R	R	R	R	R	S
060037	2006	CANINE	LABRADOR RETRIEVER	FEMALE SPAYED	ear	15	26	17		S	R	S	S		R			R	S	R		R		R	R		16		31.43	Type 5 (331 bp)	Clinical	No	No		S	R	R	S	S		R			R	S	R		R
061066a	2006	CANINE	LABRADOR RETRIEVER	FEMALE SPAYED	ear	12	27	15		S	R	S	S		R			R	S	R		R		R	R		O: 3/ I: >256		22.75	Type 5 (PCR)	Clinical	No	No		S	R	R	S	S		R			R	S	R		R
061066b	2006	CANINE	LABRADOR RETRIEVER	FEMALE SPAYED	ear	23	34	24		S	R	S	S		R			R	R	R		R		R	R		1		POS	Type 5	Clinical	No	No		S	R	S	S	S		R			R	R	R		R
061067	2006	CANINE	LABRADOR RETRIEVER	FEMALE SPAYED	ear	15	24	16		S	R	S	S		R			R	R	R		R		R	R		64		POS	Type 5	Clinical	No	No		S	R	R	S	S		R			R	R	R		R
81632	2008	CANINE	LABRADOR RETRIEVER	FEMALE SPAYED	skin	6	22	11	S	S	R	S	S		R	I		R	I	R		R	S	R	R					mec+, Type 5	Clinical			S	S	R	R	S	S		R	R		R	R	R		R	S
81324	2008	CANINE	BLUE TICK HOUND	FEMALE	ear	14	23	17		S	R	S	S		R			R	I	R		R		R	R					mec+, Type 5	Clinical				S	R	R	S	S		R			R	R	R		R
074981	2007	CANINE	ROTTWEILER	FEMALE	ear	21	33	31		S	R	S	S		S			S	S	S		R		S	S						Referral				S	R	S	S	S		S			S	S	S		R
82148e	2008	CANINE	LABRADOR RETRIEVER	MALE CASTRATED	skin	14	25	15		S		S	S		S			S	S	S		R		S	S					0, no band	Referral				S		R	S	S		S			S	S	S		R
82148k	2008	CANINE	LABRADOR RETRIEVER	MALE CASTRATED	skin	17	27	20		S		S	S		S			S	S	S		R		S	S					0, no band	Referral				S		R	S	S		S			S	S	S		R
064367	2006	CANINE			ear	22	36	31		S	R	S	S		S			S	S	S		R		S	R					0	Referral	No	No		S	R	S	S	S		S			S	S	S		R
060632	2006	CANINE	MIXED BREED DOG	FEMALE SPAYED	skin	6	25	13		S	R	S	S		R			R	S	R		R		R	R		>256		29.58	Type 5 (376 bp)	Clinical	No	No		S	R	R	S	S		R			R	S	R		R
091741	2009	CANINE			skin	20	36	32		S	R	S	S		S			S	S	S		R		S	S					Neg	Referral				S	R	S	S	S		S			S	S	S		R
82788	2008	CANINE			skin	22	36	32		S	R	S	S		R			R	R	S		R		R	R					0, no band	Referral				S	R	S	S	S		R			R	R	S		R
094730	2009	CANINE			skin	23	34	30		S	R	S	S		S			S	S	S		R		R	S						Referral				S	R	S	S	S		S			S	S	S		R
094200	2009	CANINE	GREAT PYRENEES	MALE CASTRATED	skin	9	23	13	S	S	R	S	S		R	I		R	I	R	R	R	S	R	R					POS	Clinical			S	S	R	R	S	S		R	R		R	R	R	R	R	S
094620	2009	CANINE			ear	20	32	28		S	R	S	S		S			S	S	S		R		S	S						Referral				S	R	S	S	S		S			S	S	S		R
80585	2008	CANINE	CAVALIER KING CHARLES SPANIEL	FEMALE SPAYED	ear	9	22	9	S	S	R	S	S		R			R	I	R		R		R	R					mec+, Type 5	Clinical			S	S	R	R	S	S		R			R	R	R		R
80586	2008	CANINE	CAVALIER KING CHARLES SPANIEL	FEMALE SPAYED	ear	9	22	11	S	S	R	S	S		R			R	S	R		R		R	R					mec+, Type 5	Clinical			S	S	R	R	S	S		R			R	S	R		R
80407	2008	CANINE	GOLDEN RETRIEVER	MALE CASTRATED	skin	22	36	32		S	R	S	S		R			R	R	S		R		R	R						Clinical				S	R	S	S	S		R			R	R	S		R
80408	2008	CANINE	GOLDEN RETRIEVER	MALE CASTRATED	skin	22	35	32		S	R	S	S		R			R	R	S		R		R	R						Clinical				S	R	S	S	S		R			R	R	S		R
81616	2008	CANINE	GOLDEN RETRIEVER	MALE CASTRATED	skin	21	35	32	S	S	R	S	S		R	I		R	R	S		R	S	R	R						Clinical			S	S	R	S	S	S		R	R		R	R	S		R	S
092447a	2009	CANINE	MIXED BREED DOG	MALE CASTRATED	skin	21	34	29		S	R	S	S		S			S	S	S		R		R	S					Neg	Clinical				S	R	S	S	S		S			S	S	S		R
092447b	2009	CANINE	MIXED BREED DOG	MALE CASTRATED	skin	6	25	12		S	R	S	S		R			R	S	S		R		S	S					POS	Clinical				S	R	R	S	S		R			R	S	S		R
83855	2008	CANINE	MIXED BREED DOG	MALE CASTRATED	skin	6	26	6		S	R	S	S		S			S	R	R		R		S	S						Clinical				S	R	R	S	S		S			S	R	R		R
84820	2008	CANINE	MIXED BREED DOG	MALE CASTRATED	skin	6	23	12	S	S	R	S	S		R	I		R	S	R	I	R	S	R	R						Clinical			S	S	R	R	S	S		R	R		R	S	R	R	R	S
85153	2008	CANINE			ear	19	33	28		S	R	S	S		S			S	R	S		R		R	S						Referral				S	R	S	S	S		S			S	R	S		R
061692	2006	CANINE			ear	27	34	29		S	S	S	S		S			S	S	S		S		S	S				0		Referral	No	No		S	S	S	S	S		S			S	S	S		S
094408	2009	CANINE			eye	20	32	28		S	R	S	S		S			S	S	S		R		R	S						Referral				S	R	S	S	S		S			S	S	S		R
070745	2007	CANINE			ear	26	36	32		S	R	S	S		S			S	S	S		R		S	S						Referral				S	R	S	S	S		S			S	S	S		R
072142	2007	CANINE	MIXED BREED DOG	FEMALE SPAYED	urine	27	35	32		S	R	S	S		S			S	S	S		R		S	S						Clinical				S	R	S	S	S		S			S	S	S		R
091751	2009	CANINE			ear	25	37	32		S	S	S	S		S			S	S	S		S		S	S						Referral				S	S	S	S	S		S			S	S	S		S
060395	2006	CANINE			ear	27	35	29		S	S	S	S		S			S	S	S		S		S	S				35.71		Referral	No	No		S	S	S	S	S		S			S	S	S		S
060501	2006	CANINE	MINIATURE SCHNAUZER 20-30LBS	FEMALE	bladder	28	35	30		S	S	S	S		S			S	S	S		S		S	S				n/a		Clinical	No	No		S	S	S	S	S		S			S	S	S		S
090706	2009	CANINE			urine	25	35			S	S	S	S		S			S	S	S		S		S	S						Referral				S	S		S	S		S			S	S	S		S
80384	2008	CANINE	SHIH TZU	FEMALE	eye	22	34	30		S	R	S	S	S	S			S	S	S		R		S	S						Clinical				S	R	S	S	S	S	S			S	S	S		R
093294	2009	CANINE	LABRADOR RETRIEVER	MALE	bone	19	27	26		S	R	S	S		S			S	S	S		R		S	S						Referral				S	R	S	S	S		S			S	S	S		R
81854	2008	CANINE	CAIRN TERRIER	MALE CASTRATED	skin	20	32	27		S	R	S	S		S			S	S	S		R		S	S					0, no band	Referral				S	R	S	S	S		S			S	S	S		R
84371	2008	CANINE			joint	20	33	29		S	R	S	S		S			S	R	S		R		R	R						Referral				S	R	S	S	S		S			S	R	S		R
090620	2009	CANINE	BLUE TICK HOUND	FEMALE	skin	18	33			S	R	S	S		S			S	S	S		R		S	S						Clinical				S	R		S	S		S			S	S	S		R
090621	2009	CANINE	WALKER HOUND	FEMALE	skin	22	33			S	S	S	S		S			S	S	S		S		R	S						Clinical				S	S		S	S		S			S	S	S		S
090622	2009	CANINE	HOUND,OTTER	FEMALE	skin	18	32			S	R	S	S		S			S	S	S		R		S	S						Clinical				S	R		S	S		S			S	S	S		R
060055	2006	CANINE	BRITTANY SPANIEL	MALE CASTRATED	ear	23	34	31		S	R	S	S		S			S	S	S		R		R	S						Clinical	No	No		S	R	S	S	S		S			S	S	S		R
060057	2006	CANINE	BRITTANY SPANIEL	MALE CASTRATED	skin	27	36	30		S	S	S	S		S			S	S	S		S		S	S						Clinical	No	No		S	S	S	S	S		S			S	S	S		S
060057b	2006	CANINE	BRITTANY SPANIEL	MALE CASTRATED	skin	6	11	6		R	R	S	S		S			S	S	S		R		S	S						Clinical	No	No		R	R	R	S	S		S			S	S	S		R
060060	2006	CANINE	BRITTANY SPANIEL	MALE CASTRATED	skin	22	36	31		S	R	S	S		S			S	S	S		R		R	S						Clinical	No	No		S	R	S	S	S		S			S	S	S		R
060876	2006	CANINE	BRITTANY SPANIEL	MALE CASTRATED	skin	25	37	33		S	S	S	S		S			S	S	S		S		R	S						Clinical	No	No		S	S	S	S	S		S			S	S	S		S
060877	2006	CANINE	BRITTANY SPANIEL	MALE CASTRATED	ear	22				S	S	S	S		S			S	S	S		S		S	S						Clinical	No	No		S	S		S	S		S			S	S	S		S
060878	2006	CANINE	BRITTANY SPANIEL	MALE CASTRATED	skin	26	38	34		S	R	S	S		S			S	S	S		R		R	S				n/a		Clinical	No	No		S	R	S	S	S		S			S	S	S		R
060881	2006	CANINE	BRITTANY SPANIEL	MALE CASTRATED	skin	25	37	33		S	R	S	S		S			S	S	S		R		R	S				n/a		Clinical	No	No		S	R	S	S	S		S			S	S	S		R
062085	2006	CANINE	BRITTANY SPANIEL	MALE CASTRATED	skin	27	36	32		S	R	S	S		S			S	S	S		R		S	S				n/a		Clinical	No	No		S	R	S	S	S		S			S	S	S		R
070656	2007	CANINE	WALKER HOUND	FEMALE	bone	22	33	30		S	R	S	S		S			S	S	S		R		S	S						Clinical				S	R	S	S	S		S			S	S	S		R
070743	2007	CANINE	DOBERMAN PINSCHER	UNKNOWN	brain	21	33	30		S	R	S	S		S			S	S	S		R		S	I						Clinical				S	R	S	S	S		S			S	S	S		R
82665	2008	CANINE		UNKNOWN	mouth/nasal	21	32	26		S	R	S	S		S			S	S	S		R		S	S					0, no band	Clinical				S	R	S	S	S		S			S	S	S		R
82666	2008	CANINE		UNKNOWN	mouth/nasal	22	34	29		S	R	S	S		S			S	S	S		R		S	S					0, no band	Clinical				S	R	S	S	S		S			S	S	S		R
82703	2008	CANINE		UNKNOWN	mouth/nasal	6	22	6	S	R	R	R	R		R	I		R	I	R		R	S	R	R					mec+, Type 3	Clinical			S	R	R	R	R	R		R	R		R	R	R		R	S
82835	2008	CANINE		UNKNOWN	mouth/nasal	24	35	32		S	S	S	S		S			S	S	S		S		S	S					0,	Clinical				S	S	S	S	S		S			S	S	S		S
82884	2008	CANINE		UNKNOWN	mouth/nasal	12	25	15	S	S	R	S	S		R	I		R	I	R		R	S	R	R					mec+,	Clinical			S	S	R	R	S	S		R	R		R	R	R		R	S
83035	2008	CANINE		UNKNOWN	mouth/nasal	25	34	29		S	S	S	S		S			S	S	S		S		R	I					0,	Clinical				S	S	S	S	S		S			S	S	S		S
83153	2008	CANINE		UNKNOWN	mouth/nasal	24	32	28		S	S	S	S		S			S	S	S		S		S	S						Clinical				S	S	S	S	S		S			S	S	S		S
83210a	2008	CANINE		UNKNOWN	mouth/nasal	23	33	24		S	S	S	S		S			S	S	S		S		S	S						Clinical				S	S	S	S	S		S			S	S	S		S
83212a	2008	CANINE		UNKNOWN	mouth/nasal	24	34	29		S	S	S	S		S			S	S	S		S		S	S						Clinical				S	S	S	S	S		S			S	S	S		S
83213a	2008	CANINE		UNKNOWN	mouth/nasal	20	34	31		S	R	S	S		S			S	S	S		R		S	S						Clinical				S	R	S	S	S		S			S	S	S		R
83270	2008	CANINE		UNKNOWN	mouth/nasal	24	32	28		S	S	S	S		S			S	S	S		S		S	S						Clinical				S	S	S	S	S		S			S	S	S		S
83349a	2008	CANINE		UNKNOWN	mouth/nasal	24	33	29		S	S	S	S		R			R	S	S		S		S	S						Clinical				S	S	S	S	S		R			R	S	S		S
83349c	2008	CANINE		UNKNOWN	mouth/nasal	24	34	28		S	S	S	S		S			S	S	S		S		S	S						Clinical				S	S	S	S	S		S			S	S	S		S
83765	2008	CANINE		UNKNOWN	mouth/nasal	25	33	29		S	S	S	S		S			S	S	S		S		S	R						Clinical				S	S	S	S	S		S			S	S	S		S
83766	2008	CANINE		UNKNOWN	mouth/nasal	23	32	30		S	R	S	S		S			S	S	S		R		R	S						Clinical				S	R	S	S	S		S			S	S	S		R
83767	2008	CANINE		UNKNOWN	mouth/nasal	23	33	29		S	R	S	S		S			S	S	S		R		R	S						Clinical				S	R	S	S	S		S			S	S	S		R
83768b	2008	CANINE		UNKNOWN	mouth/nasal	22	33	30		S	R	S	S		S			S	S	S		R		R	S						Clinical				S	R	S	S	S		S			S	S	S		R
83784	2008	CANINE		UNKNOWN	mouth/nasal	6	22	6		S	R	S	S		R			R	S	R		R		R	R						Clinical				S	R	R	S	S		R			R	S	R		R
83804	2008	CANINE		UNKNOWN	mouth/nasal	12	21	14	S	S	R	S	S		R	I		R	S	S	I	R	S	R	R						Clinical			S	S	R	R	S	S		R	R		R	S	S	R	R	S
84438	2008	CANINE		UNKNOWN	mouth/nasal	11	25	15	S	S	R	S	S		R	I		R	S	R	R	R	S	R	R						Clinical			S	S	R	R	S	S		R	R		R	S	R	R	R	S
80986	2008	CANINE	BLUE TICK HOUND	MALE CASTRATED	skin	25	34	28		S	S	S	S		S			S	S	S		S		S	S						Clinical				S	S	S	S	S		S			S	S	S		S
81509	2008	CANINE	BLUE TICK HOUND	MALE CASTRATED	skin	25	34	30		S	S	S	S		S			S	S	S		S		S	S						Clinical				S	S	S	S	S		S			S	S	S		S
091514	2009	CANINE	WEST HIGHLAND WHITE TERRIER	MALE CASTRATED	urine	18	33	28		S	R	S	S		S			S	S	S		R		S	S					Neg	Clinical				S	R	S	S	S		S			S	S	S		R
060194	2006	CANINE	ENGLISH SETTER	MALE	skin	23	35	30		S	R	S	S		R			R	S	S		R		R	S		0.25		36.64		Clinical	No	No		S	R	S	S	S		R			R	S	S		R
062974	2006	CANINE			urine	27	42	>30		S	R	S	S		S			S	S	S		R		S	S				37.42		Referral	No	No		S	R	S	S	S		S			S	S	S		R
064816	2006	CANINE	ENGLISH SETTER	MALE	skin	24	35	32		S	R	S	S		R			R	S	S		R		R	I		0.19			0	Clinical	No	No		S	R	S	S	S		R			R	S	S		R
065572	2006	CANINE	ENGLISH SETTER	MALE	skin	6	23	10		S	R	S	S		R			R	I	R		R		R	R		>256			Type 5	Clinical	No	No		S	R	R	S	S		R			R	R	R		R
075884	2007	CANINE	CANINE UNASSIGNED	FEMALE	skin	12	25	15		S	R	S	S		R			R	R	R		R		R	R					mec+, Type 5	Clinical				S	R	R	S	S		R			R	R	R		R
80247	2008	CANINE	CANINE UNASSIGNED	FEMALE	skin	13	25	15		S	R	S	S		R			R	I	R		R		R	R					mec+, Type 5	Clinical				S	R	R	S	S		R			R	R	R		R
80494	2008	CANINE	CANINE UNASSIGNED	FEMALE	skin	13	25	6	S	S	R	S	S		R	I		R	I	R		R	S	R	R					mec+, Type 5	Clinical			S	S	R	R	S	S		R	R		R	R	R		R	S
092128	2009	CANINE	MIXED BREED DOG	FEMALE SPAYED	urine	20	34	30		S	R	S	S		S			S	S	S		R		R	S						Clinical				S	R	S	S	S		S			S	S	S		R
093397	2009	CANINE	LABRADOR RETRIEVER	MALE	ear	24	35	30		S	S	S	S		S			S	S	S		S		S	S						Clinical				S	S	S	S	S		S			S	S	S		S
070088	2007	CANINE	MIXED BREED DOG	MALE CASTRATED	joint	19	28	20		S	R	S	S		S			S	S	S		R		S	S						Clinical				S	R	R	S	S		S			S	S	S		R
070926	2007	CANINE	MIXED BREED DOG	MALE CASTRATED	joint	20	25	21		S	R	S	S		S			S	S	S		R		S	S						Clinical				S	R	S	S	S		S			S	S	S		R
074266	2007	CANINE			ear	17	24	19		S	R	S	S		S			S	S	S		R		S	S					0, no band*	Referral				S	R	R	S	S		S			S	S	S		R
094250	2009	CANINE	MIXED BREED DOG	MALE CASTRATED	skin	16	25	18		S	R	S	S		S			S	S	S		R		S	S						Clinical				S	R	R	S	S		S			S	S	S		R
83510	2008	CANINE	FRENCH BULLDOG	MALE	skin	20	33	30		S	R	S	S		S			S	S	S		R		S	I						Clinical				S	R	S	S	S		S			S	S	S		R
83561	2008	CANINE	FRENCH BULLDOG	MALE	skin	20	34	28		S	R	S	S		S			S	S	S		R		S	I						Clinical				S	R	S	S	S		S			S	S	S		R
81653	2008	CANINE	GERMAN SHEPHERD DOG	FEMALE SPAYED	skin	25	35	32		S	R	S	S		S			S	S	S		R		S	S						Clinical				S	R	S	S	S		S			S	S	S		R
072988	2007	CANINE			urine	21	36	33		S	R	S	S		S			S	S	S		R		S	S						Referral				S	R	S	S	S		S			S	S	S		R
074995	2007	CANINE	ENGLISH SPRINGER SPANIEL	MALE CASTRATED	nasal	20	32	29		S	R	S	S		R			R	I	S		R		R	R						Clinical				S	R	S	S	S		R			R	R	S		R
82761	2008	CANINE			skin	14	29	21		S	R	S	S		R			R	S	S		R		R	S					0, no band	Referral				S	R	S	S	S		R			R	S	S		R
83256	2008	CANINE	MIXED BREED DOG	FEMALE SPAYED	skin	20	35	29		S	R	S	S		S			S	S	S		R		R	I						Clinical				S	R	S	S	S		S			S	S	S		R
84536a	2008	CANINE	MIXED BREED DOG	FEMALE SPAYED	skin	12	26	17		S	R	S	S		S			S	S	S		R		S	S						Clinical				S	R	R	S	S		S			S	S	S		R
84536b	2008	CANINE	MIXED BREED DOG	FEMALE SPAYED	skin	6	24	11		S	R	S	S		S			S	S	S		R		S	S						Clinical				S	R	R	S	S		S			S	S	S		R
093676	2009	CANINE			skin	19	34	28		S	R	S	S		S			S	S	S		R		R	R					Neg	Referral				S	R	S	S	S		S			S	S	S		R
091839	2009	CANINE	BOSTON TERRIER	MALE CASTRATED	nasal	21	35	29		S	R	S	S		S			S	S	S		R		R	S						Referral				S	R	S	S	S		S			S	S	S		R
091382	2009	CANINE			ear	17/18	34	26		S	S	S	S		S			S	S	S		S		S	S	0.5				Neg	Referral				S	S	S	S	S		S			S	S	S		S
81203	2008	CANINE			ear	26	35	29		S	S	S	S		S			S	S	S		S		S	S						Referral				S	S	S	S	S		S			S	S	S		S
073801	2007	CANINE	ENGLISH BULLDOG	FEMALE SPAYED	ear	21	28	25		S	R	S	S		S			S	S	S		R		S	S						Clinical				S	R	S	S	S		S			S	S	S		R
073801	2007	CANINE	ENGLISH BULLDOG	FEMALE SPAYED	ear	19	30	27		S	R	S	S		S			S	S	S		R		S	S						Clinical				S	R	S	S	S		S			S	S	S		R
073245	2007	CANINE	YORKSHIRE TERRIER	MALE CASTRATED	skin	22	30	31		S	R	S	S		S			S	S	S		R		S	S						Clinical				S	R	S	S	S		S			S	S	S		R
061863	2006	CANINE			ear	24	38	32		S	R	S	S		S			S	S	S		R		S	S				36.25		Referral	No	No		S	R	S	S	S		S			S	S	S		R
090355	2009	CANINE	ENGLISH SPRINGER SPANIEL	FEMALE SPAYED	skin	24	35			S	R	S	S		S			S	S	S		R		S	S					POS	Referral				S	R		S	S		S			S	S	S		R
076320	2007	CANINE	GERMAN SHEPHERD DOG	MALE	skin	20	32	29		S	R	S	S		S			S	I	R		R		S	S						Clinical				S	R	S	S	S		S			S	R	R		R
83179	2008	CANINE			ear	24	33	28		S	S	S	S		S			S	S	S		S		S	S						Referral				S	S	S	S	S		S			S	S	S		S
072646	2007	CANINE			ear	24	>30	29		S	S	S	S		S			S	S	S		S		S	S						Referral				S	S	S	S	S		S			S	S	S		S
094706	2009	CANINE			urine	12	25	17		S	R	S	S		R			R	S	S		R		S	S					POS	Referral				S	R	R	S	S		R			R	S	S		R
063689	2006	CANINE	JACK RUSSELL TERRIER	MALE CASTRATED	skin	6	22	6		R	R	S	S		R			R	S	R		R		R	R		>256			Type 5	Clinical	No	No		R	R	R	S	S		R			R	S	R		R
076277	2007	CANINE			ear	21	35	30		S	R	S	S		S			S	S	S		R		S	S						Referral				S	R	S	S	S		S			S	S	S		R
062228	2006	CANINE	COCKER SPANIEL	MALE CASTRATED	ear	25	32	28		S	S	S	S		S			S	S	S		S		S	S				0		Clinical	No	No		S	S	S	S	S		S			S	S	S		S
062509	2006	CANINE	COCKER SPANIEL	MALE CASTRATED	ear	25	34	30		S	S	S	S		S			S	S	S		S		S	S				37.49		Clinical	No	No		S	S	S	S	S		S			S	S	S		S
81581	2008	CANINE			skin	26	33	28		S	S	S	S		S			S	S	S		S		S	S						Referral				S	S	S	S	S		S			S	S	S		S
85341	2008	CANINE			vaginal	19	26			S	S	S	S		S			S	S	S		S		S	S						Referral				S	S		S	S		S			S	S	S		S
090755	2009	CANINE	WEST HIGHLAND WHITE TERRIER	FEMALE SPAYED	skin	20	36			S	R	S	S		S			S	S	S		R		S	S						Clinical				S	R		S	S		S			S	S	S		R
091383	2009	CANINE			skin	12	27	16		S	R	S	S		S			S	S	S		R		S	S					Neg	Referral				S	R	R	S	S		S			S	S	S		R
070982	2007	CANINE	MIXED BREED DOG	FEMALE SPAYED	nasal	6	22	6		S	R	S	S		R			R	I	R		R		R	R					mec+, Type 5	Clinical				S	R	R	S	S		R			R	R	R		R
82209	2008	CANINE	GREAT DANE	FEMALE SPAYED	skin	24	34	30		S		S	S		S			S	S	S		S		S	S					0, no band	Clinical				S		S	S	S		S			S	S	S		S
061732	2006	CANINE			urine	27	36	32		S	S	S	S		S			S	S	S		S		S	S				0		Referral	No	No		S	S	S	S	S		S			S	S	S		S
063091	2006	CANINE	PEKINGESE	FEMALE SPAYED	urine	24	34	31		S	S	S	S		S			S	S	S		S		S	S				41.57		Clinical	No	No		S	S	S	S	S		S			S	S	S		S
81148	2008	CANINE	PEKINGESE	FEMALE SPAYED	urine	23	34	28		S	S	S	S		S			S	S	S		S		S	S						Clinical				S	S	S	S	S		S			S	S	S		S
84444	2008	CANINE	COCKER SPANIEL	FEMALE SPAYED	skin	6	19	6	S	R	R	R	S		R	I		R	S	R	I	R	S	R	R						Clinical			S	R	R	R	R	S		R	R		R	S	R	R	R	S
81721	2008	CANINE			ear	19	31	28		S	R	S	S		S			S	S	S		R		R	S					0, no band	Referral				S	R	S	S	S		S			S	S	S		R
072696	2007	CANINE			eye	6	23	6		S	R	S	S	R	R			R	S	R		R		R	R					mec+, Type 5	Referral				S	R	R	S	S	R	R			R	S	R		R
060497a	2006	CANINE	SAINT BERNARD	MALE	skin	6	9	6		S	S	S	S		R			R	S	R		S		S	S				26.33	Type 2	Clinical	No	No		S	S	R	S	S		R			R	S	R		S
065431	2006	CANINE	MASTIFF	FEMALE SPAYED	skin	6	22	6		S	R	S	S		R			R	S	R		R		R	R		>256			Type 5	Clinical	No	No		S	R	R	S	S		R			R	S	R		R
70246	2008	CANINE	ENGLISH SPRINGER SPANIEL	MALE CASTRATED	skin	21	33	28		S	R	S	S		S			S	I	S		R		S	R						Clinical				S	R	S	S	S		S			S	R	S		R
093426	2009	CANINE			skin	6	19	6		R	R	R	S		R			R	I	R		R		R	R					POS	Referral				R	R	R	R	S		R			R	R	R		R
093773	2009	CANINE	BULL TERRIER	MALE CASTRATED	skin	18	33	29		S	R	S	S		S			S	S	S		R		S	S					POS	Clinical				S	R	S	S	S		S			S	S	S		R
094410	2009	CANINE			ear	6	21	7		S	R	S	S		R			R	I	R		R		R	R					POS	Referral				S	R	R	S	S		R			R	R	R		R
060647	2006	CANINE			skin	6	20	6		R	R	R	S		R			R	I	S		R		S	S				23.08	1065 bp/ 0	Referral	No	No		R	R	R	R	S		R			R	R	S		R
062232	2006	CANINE			skin	6	22	6		R	R	R	S		S			S	I	R		R		S	S				POS	0 bp/ 0	Referral	No	No		R	R	R	R	S		S			S	R	R		R
063428	2006	CANINE			skin	6	22	6		R	R	R	S		R			R	I	S		R		S	S				POS	0	Referral	No	No		R	R	R	R	S		R			R	R	S		R
064894	2006	CANINE			skin	6	21	6		R	R	I	S		R			R	I	I		R		S	S				POS	0	Referral	No	No		R	R	R	R	S		R			R	R	R		R
065644	2006	CANINE			skin	6	20	6		R	R	R	S		R			R	R	R		R		S	S				POS	0	Referral	No	No		R	R	R	R	S		R			R	R	R		R
071669	2007	CANINE			skin	23	33	30		S	R	S	S		R			R	S	S		R		S	S						Referral				S	R	S	S	S		R			R	S	S		R
074278a	2007	CANINE			skin	22	32	22		S	R	S	S		R			R	S	S		R		S	S					Neg	Referral				S	R	S	S	S		R			R	S	S		R
074278b	2007	CANINE			skin	6	17	6		R	R	I	S		S			S	R	S		R		S	S					mec+, no band	Referral				R	R	R	R	S		S			S	R	S		R
076174	2007	CANINE			skin	6	17	6		R	R	R	S		R		I	R	R			R		S	S					mec+, no band	Referral				R	R	R	R	S		R		R	R	R			R
81200	2008	CANINE			skin	20	35	30		S	R	S	S		S			S	S	S		R		R	S						Referral				S	R	S	S	S		S			S	S	S		R
84967	2008	CANINE			skin	6	14	6		S	R	R	S		R			R	I	I		R		S	S						Referral				S	R	R	R	S		R			R	R	R		R
090868	2009	CANINE			skin	18	34			S	R	S	S		S			S	S	S		R		R	S						Referral				S	R		S	S		S			S	S	S		R
072498	2007	CANINE			urine	26	36	31		S	S	S	S		S			S	S	S		S		S	S						Referral				S	S	S	S	S		S			S	S	S		S
090853	2009	CANINE			skin	8	25		S	S	R	S	S		R	I		R	I	R	R	R	S	R	R					POS	Referral			S	S	R		S	S		R	R		R	R	R	R	R	S
094023	2009	CANINE	MIXED BREED DOG	FEMALE SPAYED	skin	17	33	29		S	R	S	S	S	S			S	I	S		R	S	R	S	=0.25				Neg	Clinical				S	R	S	S	S	S	S			S	R	S		R	S
094442	2009	CANINE	MIXED BREED DOG	FEMALE SPAYED	skin	20	33	29		S	R	S	S		S			S	I	S		R		R	S						Clinical				S	R	S	S	S		S			S	R	S		R
093726	2009	CANINE	MIXED BREED DOG	MALE CASTRATED	skin	18	36	31		S	R	S	S		S			S	S	S		R		R	S					Neg	Clinical				S	R	S	S	S		S			S	S	S		R
063352	2006	CANINE	MALTESE DOG	MALE CASTRATED	ear	26	35	31		S	R	S	R		R			R	R	S		R		R	R		0.125			0	Referral	No	No		S	R	S	S	R		R			R	R	S		R
075346	2007	CANINE	BEAGLE	FEMALE SPAYED	skin	22	30	26		S	S	S	S		S			S	S	S		S		S	S						Referral				S	S	S	S	S		S			S	S	S		S
83526	2008	CANINE	COLLIE	MALE CASTRATED	skin	19	32	29		S	R	S	S		S			S	S	S		R		S	S						Clinical				S	R	S	S	S		S			S	S	S		R
094496	2009	CANINE	MIXED BREED DOG	FEMALE SPAYED	skin	25	32	28		S	S	S	S		S			S	S	S		S		R	S						Clinical				S	S	S	S	S		S			S	S	S		S
091026	2009	CANINE	BOXER	MALE CASTRATED	skin	18	32	27		S	R	S	S		S			S	S	S		R		S	S						Clinical				S	R	S	S	S		S			S	S	S		R
061770	2006	CANINE	DACHSHUND	FEMALE SPAYED	urine	27	36	29		S	S	S	S		S			S	S	S		S		S	S				37.93		Clinical	No	No		S	S	S	S	S		S			S	S	S		S
[truncated: 5,806 more rows]
[truncated: 13 more columns]
